# Supplementary material for: FSTL1 aggravates high glucose-induced oxidative stress and transdifferentiation in HK-2 cells
Source: PubMed Central journal article supplement — Sci Rep. 2025 Jan 2;15:434. doi: 10.1038/s41598-024-84462-5 (PMC11696259; doi:10.1038/s41598-024-84462-5), 2025-01-02
Supplement: 41598_2024_84462_MOESM1_ESM.pdf [file 41598_2024_84462_MOESM1_ESM.pdf]

## **Instructions**

- To provide experimental efficiency, the blots were cut prior to hybridisation with antibodies during blotting.
- The code at the top left of all spots means the corresponding antibody and/or date of incubation.
- The red boxes represent the original blot areas used in the manuscript.

FSTL1-32kDa

2022-12-06

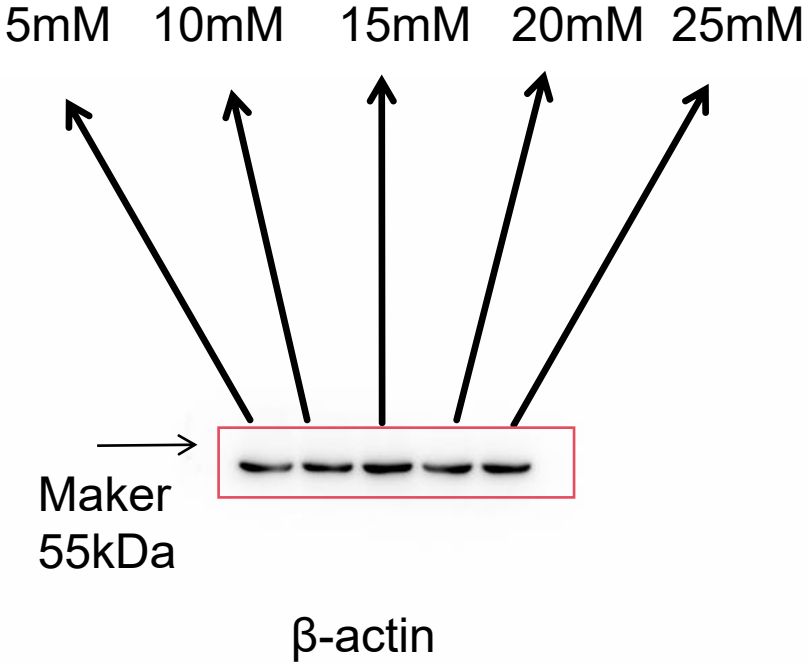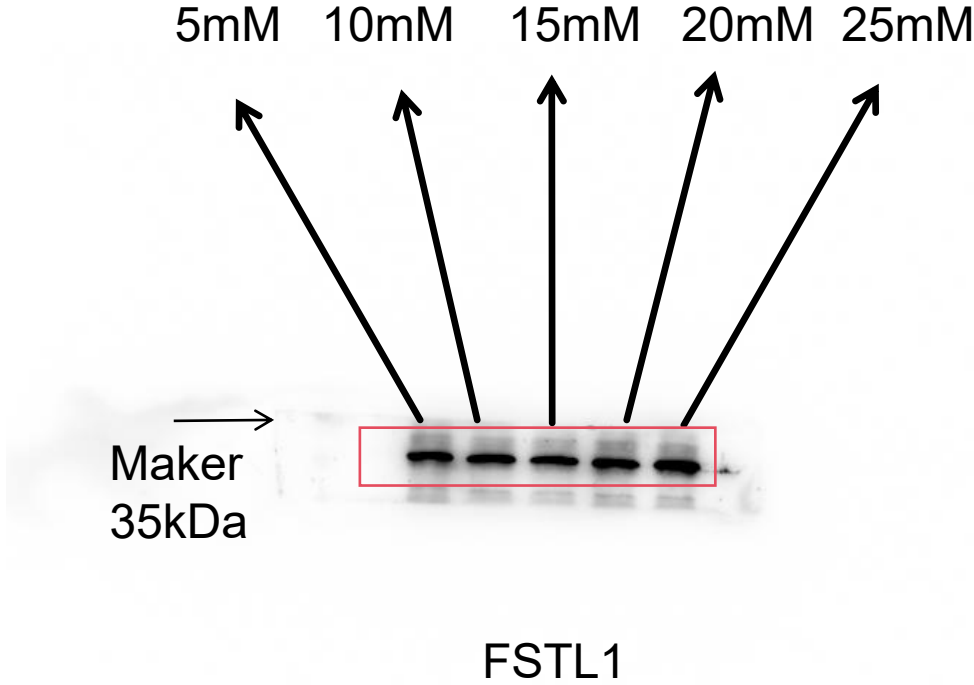

$\beta$ -actin

2022-12-16

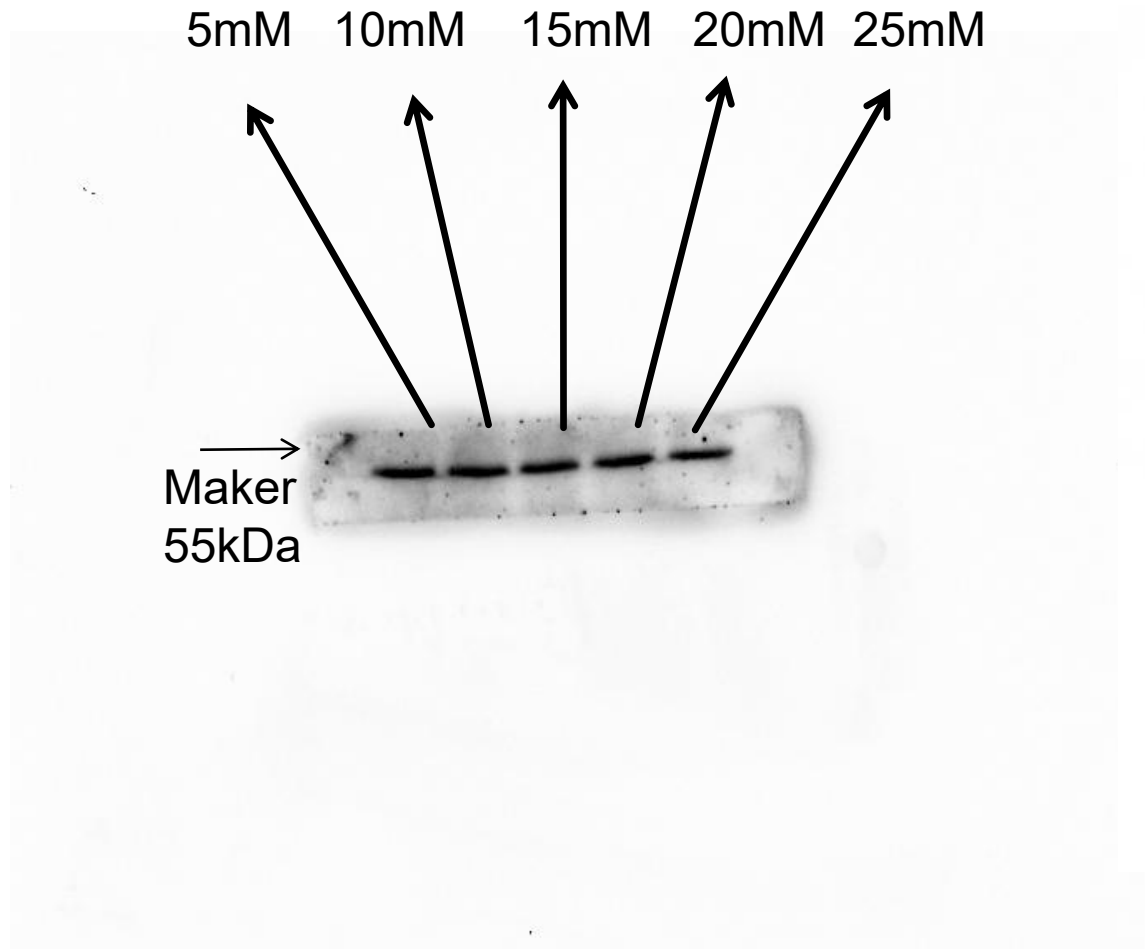

2022-12-20

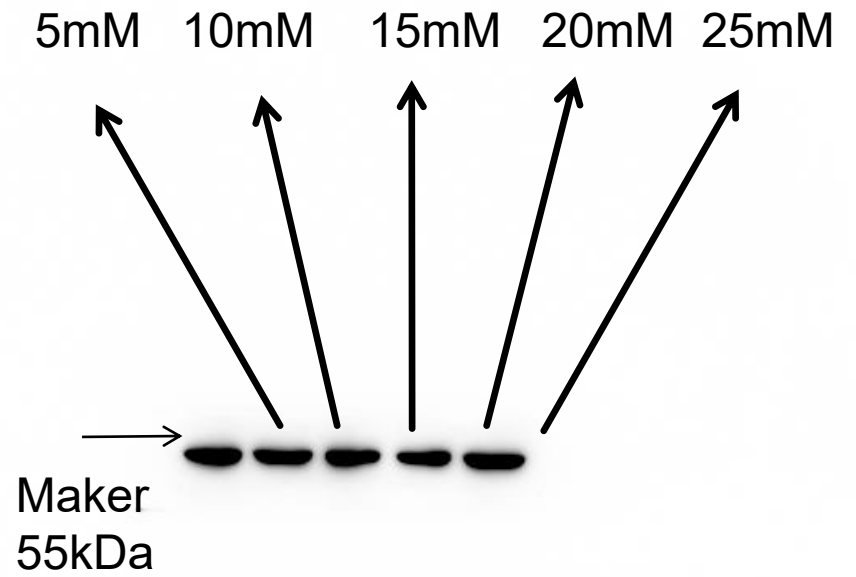

FSTL1-32kDa

2022-12-22

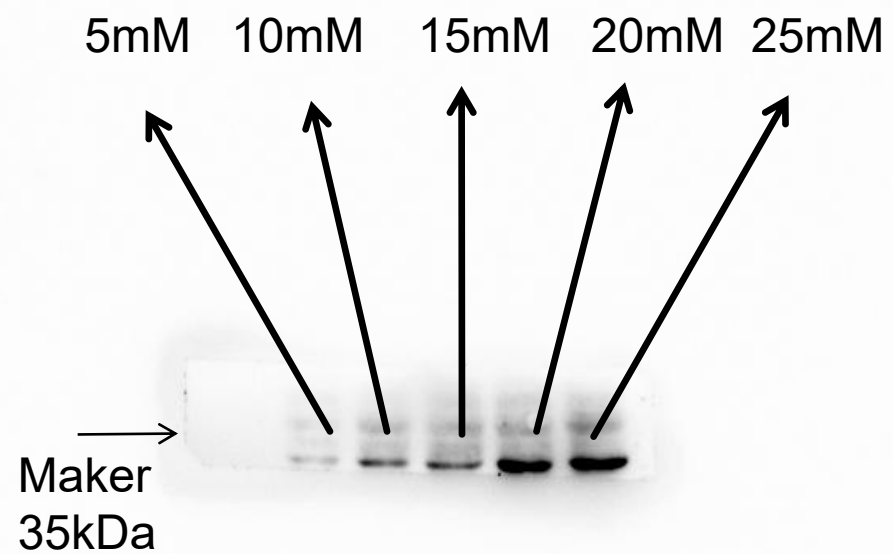

2022-12-18

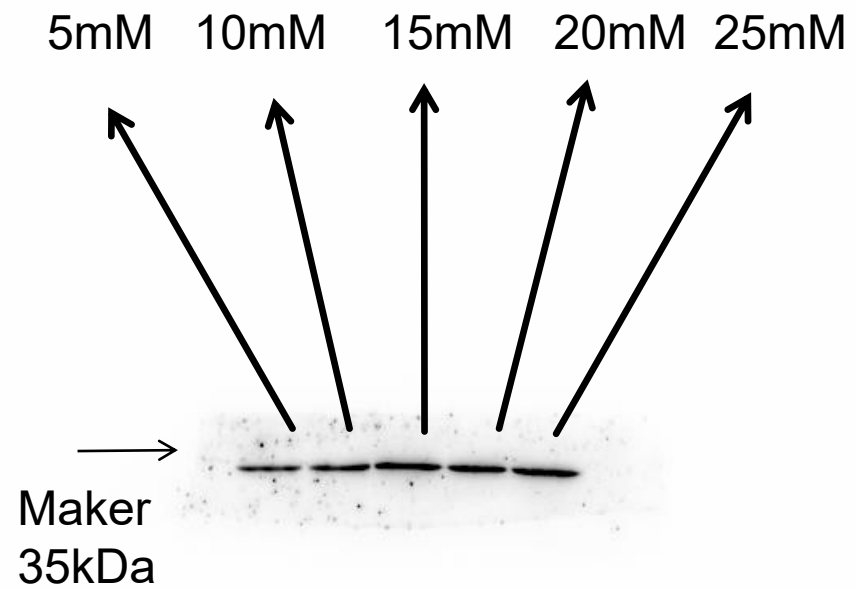

FSTL1-32kDa

2022-12-08

0h 12h 24h 48h 72h

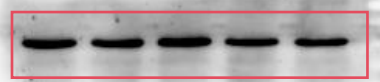

←  
Maker  
55kDa

β-actin

0h 12h 24h 48h 72h

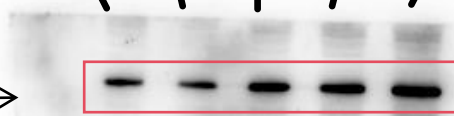

→  
Maker  
25kDa

FSTL1

$\beta$ -actin

2022-12-25

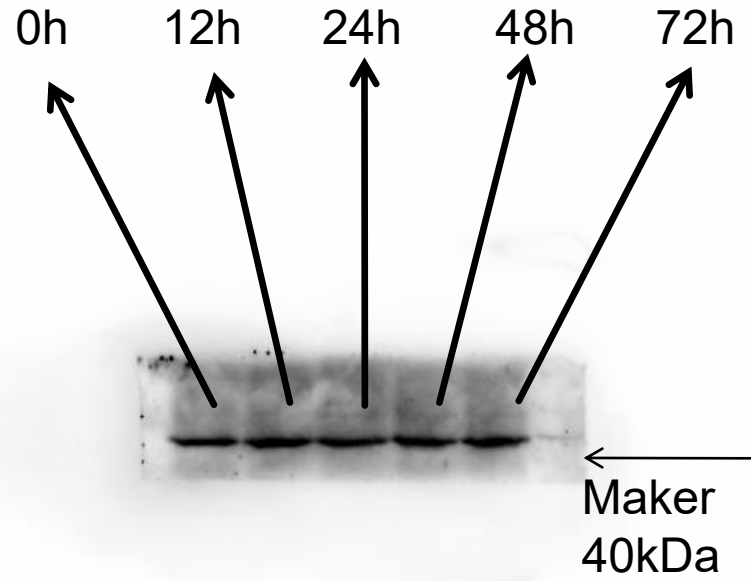

2023-01-10

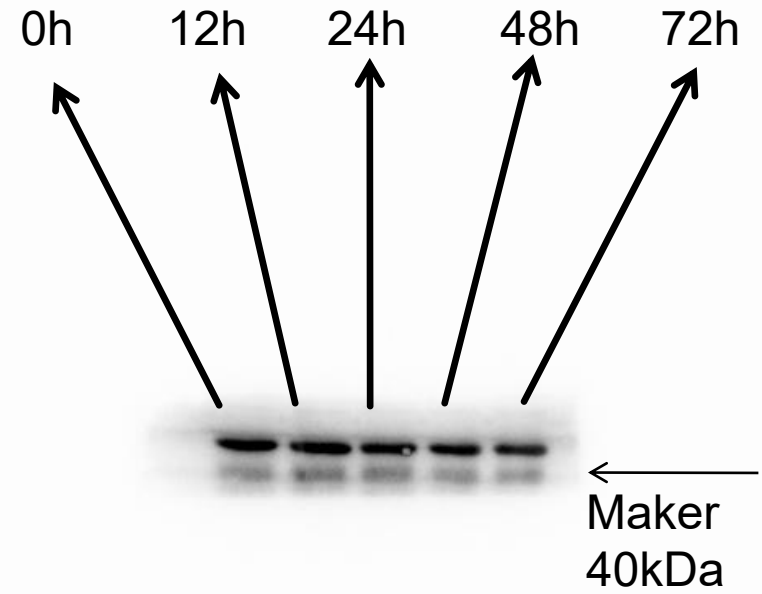

FSTL1-32kDa

2022-12-27

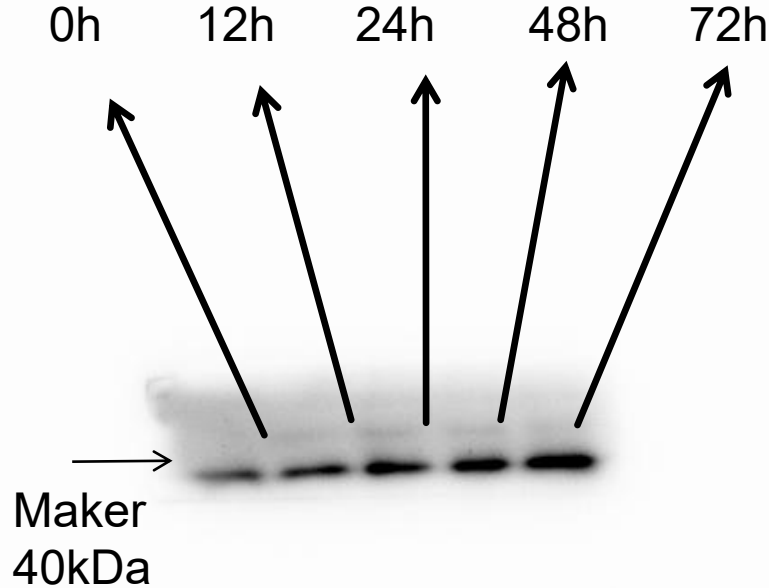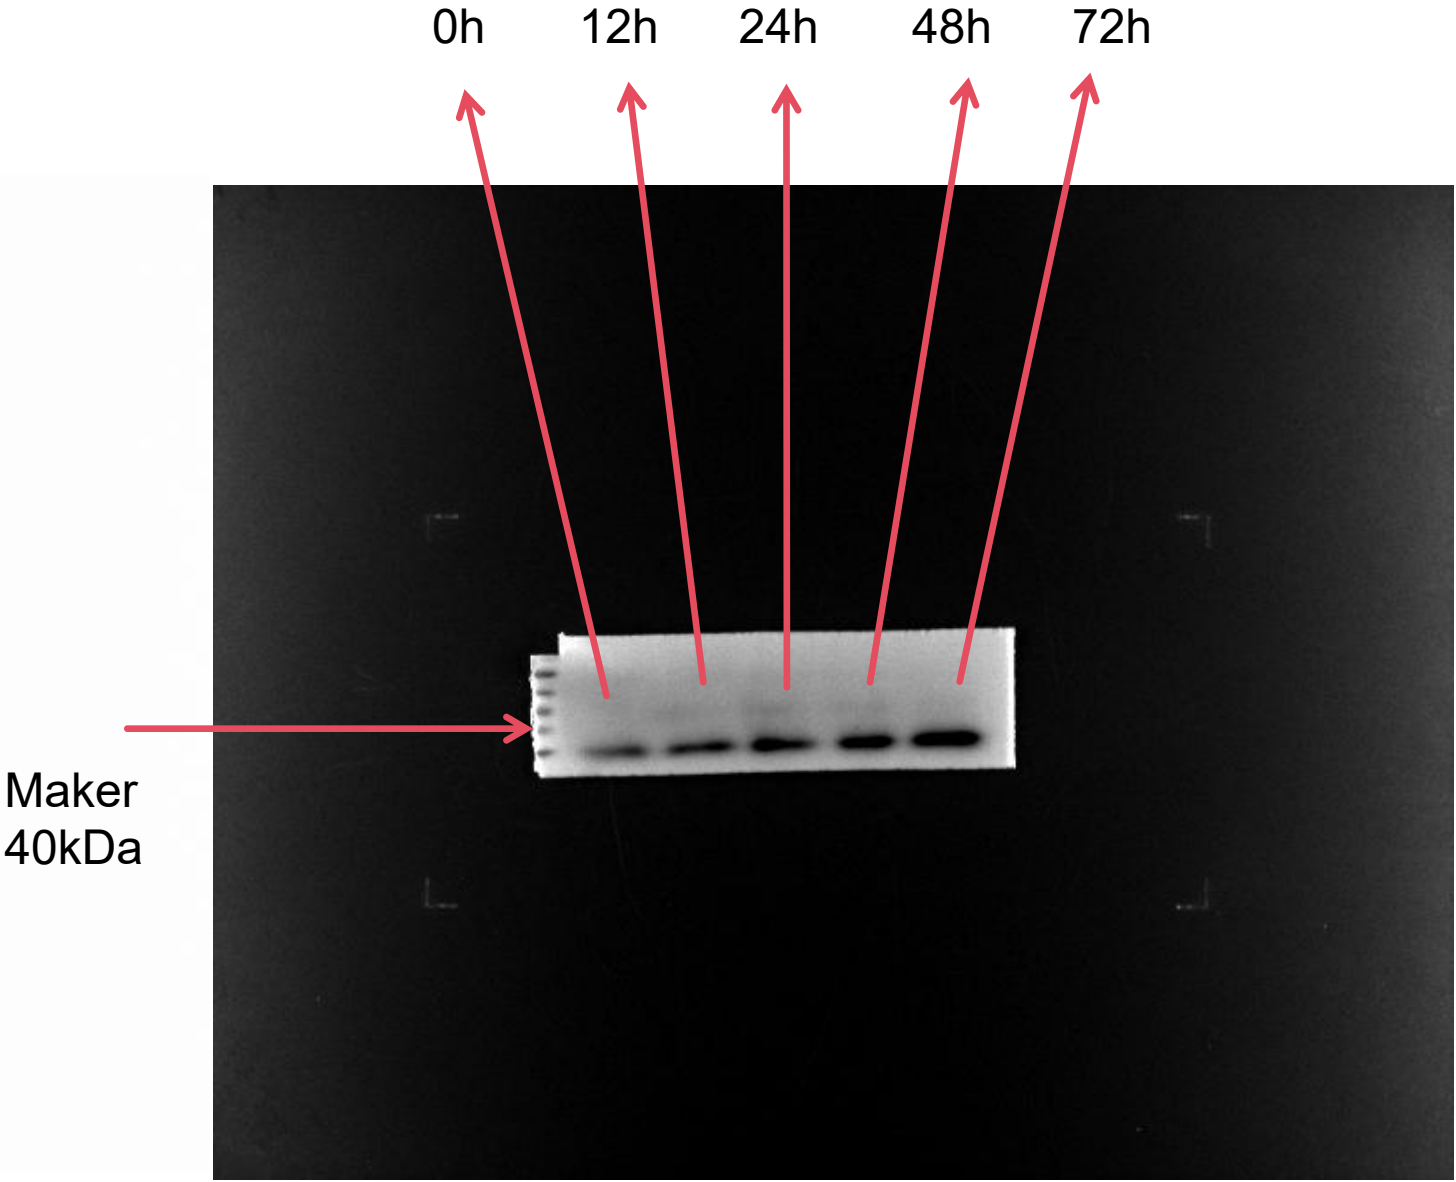

FSTL1-32kDa

2023-01-12

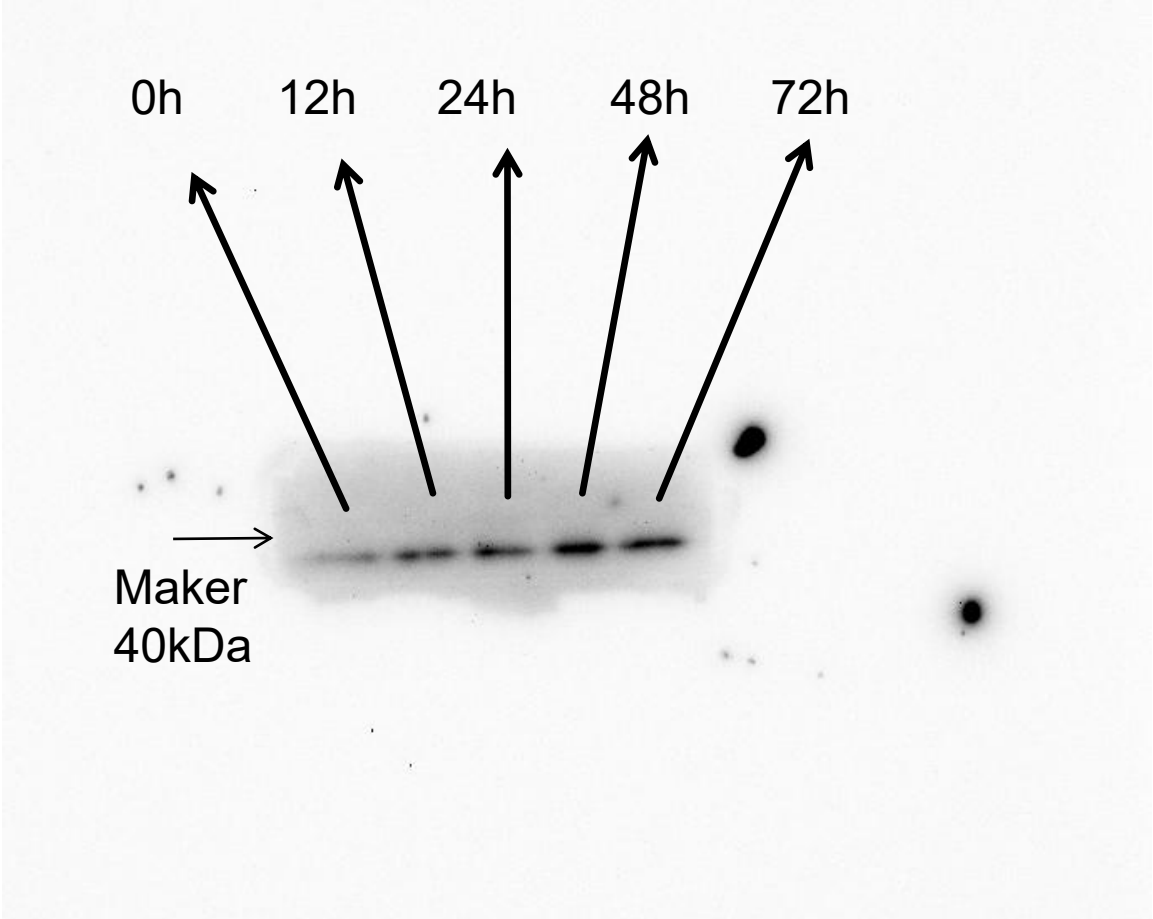



FSTL1-32kDa

2023-01-03

NG Mannitol HG

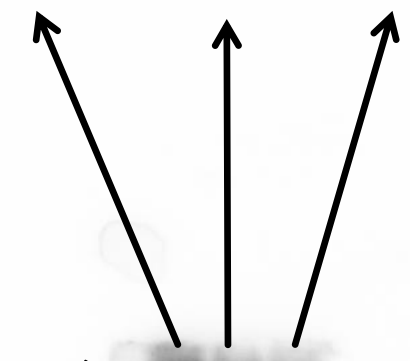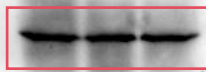

Marker  
55kDa

$\beta$ -actin

NG Mannitol HG

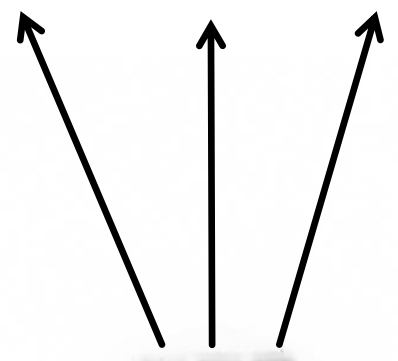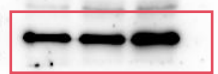

Marker  
35kDa

FSTL1

FSTL1-32kDa

2023-01-16

NG Mannitol HG

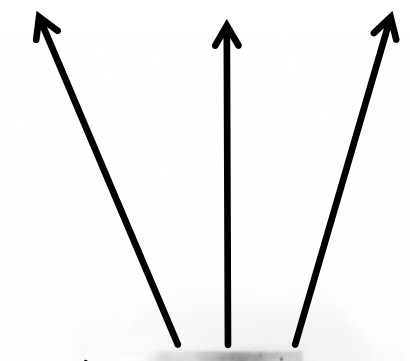

Maker  
55kDa

$\beta$ -actin

NG Mannitol HG

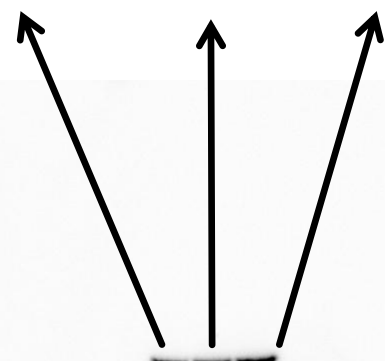

Maker  
35kDa

FSTL1

FSTL1-32kDa

2023-01-25

NG Mannitol HG

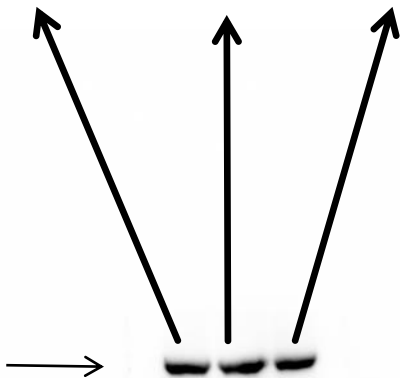

Marker  
55kDa

$\beta$ -actin

NG Mannitol HG

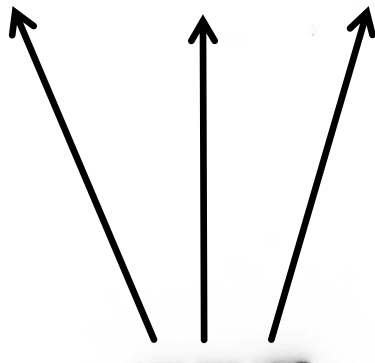

Marker  
35kDa

FSTL1

$\beta$ -actin

2023-02-27

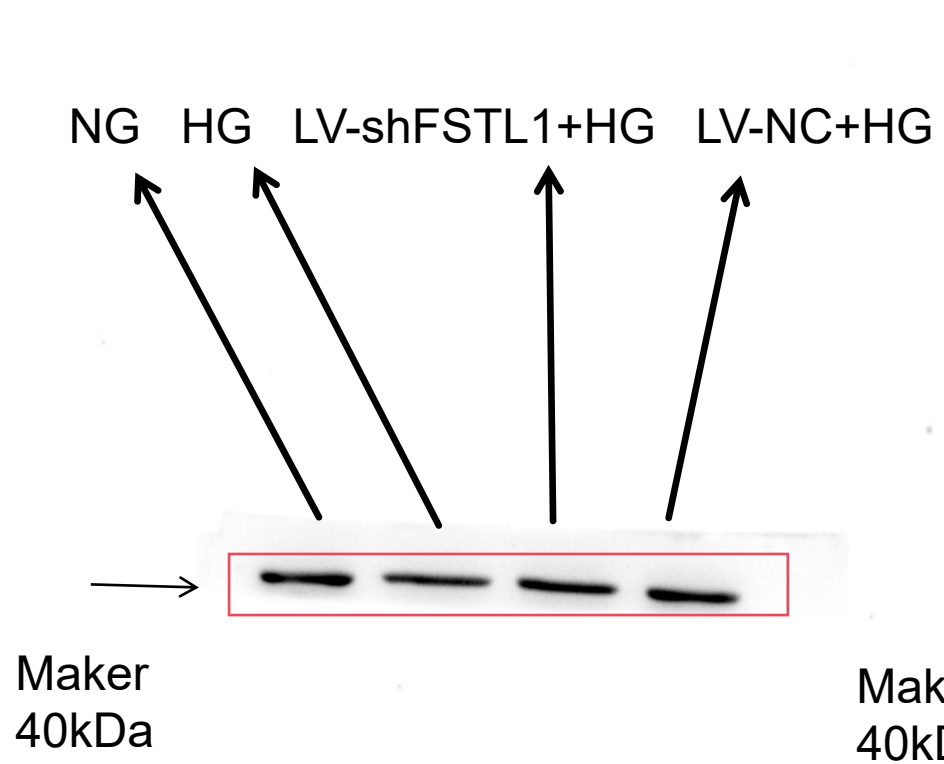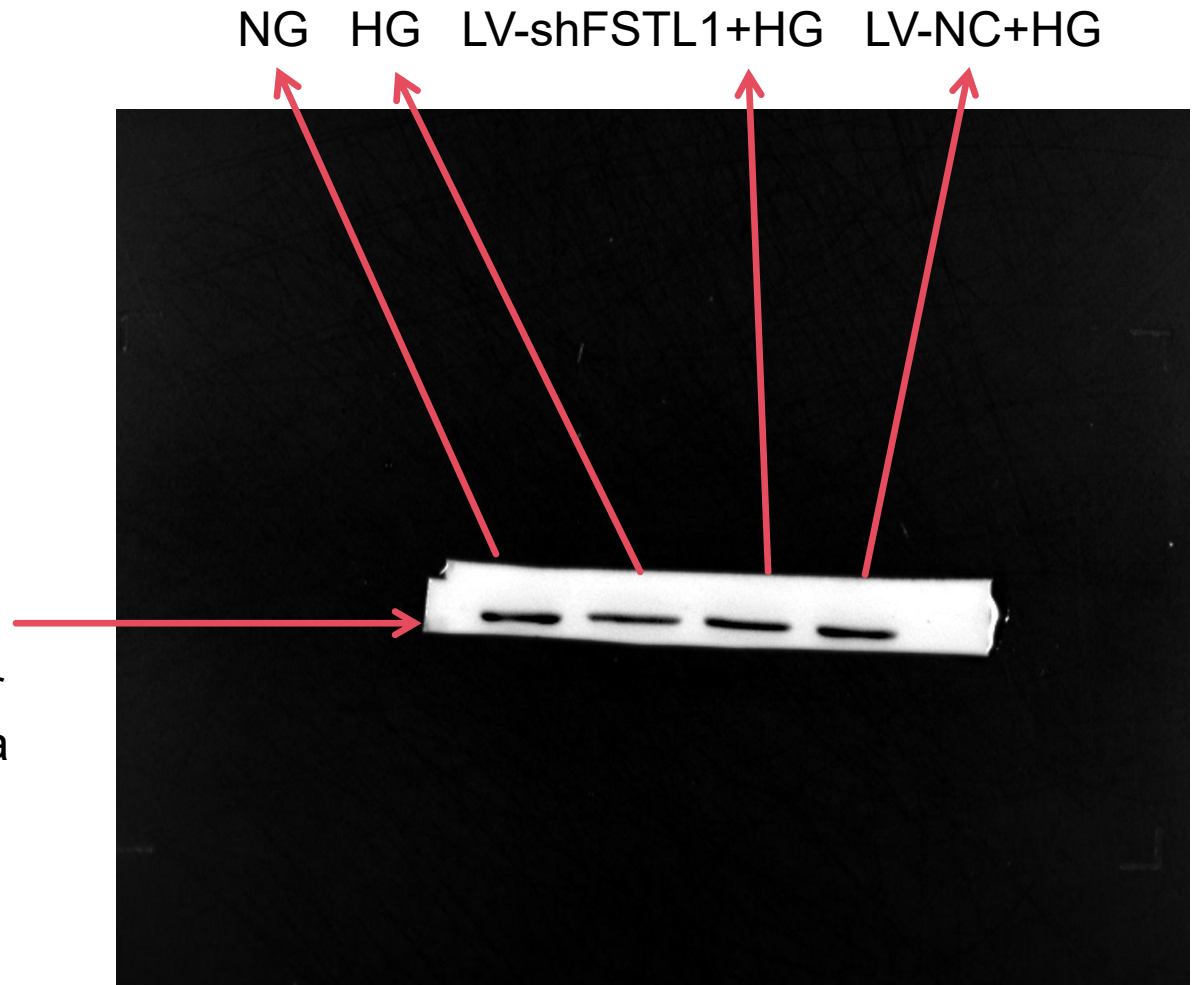

$\beta$ -actin

2023-03-20

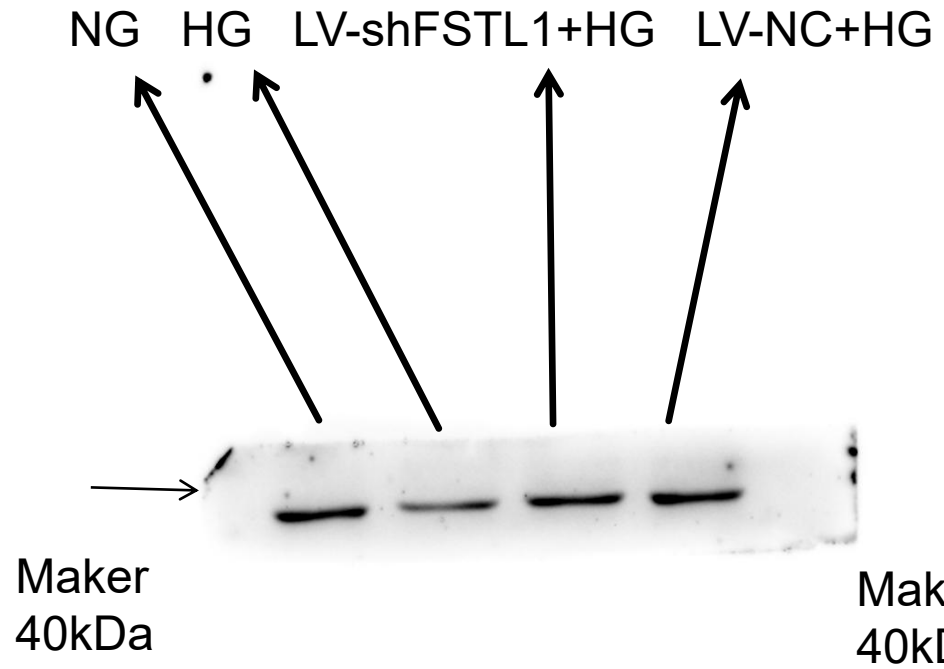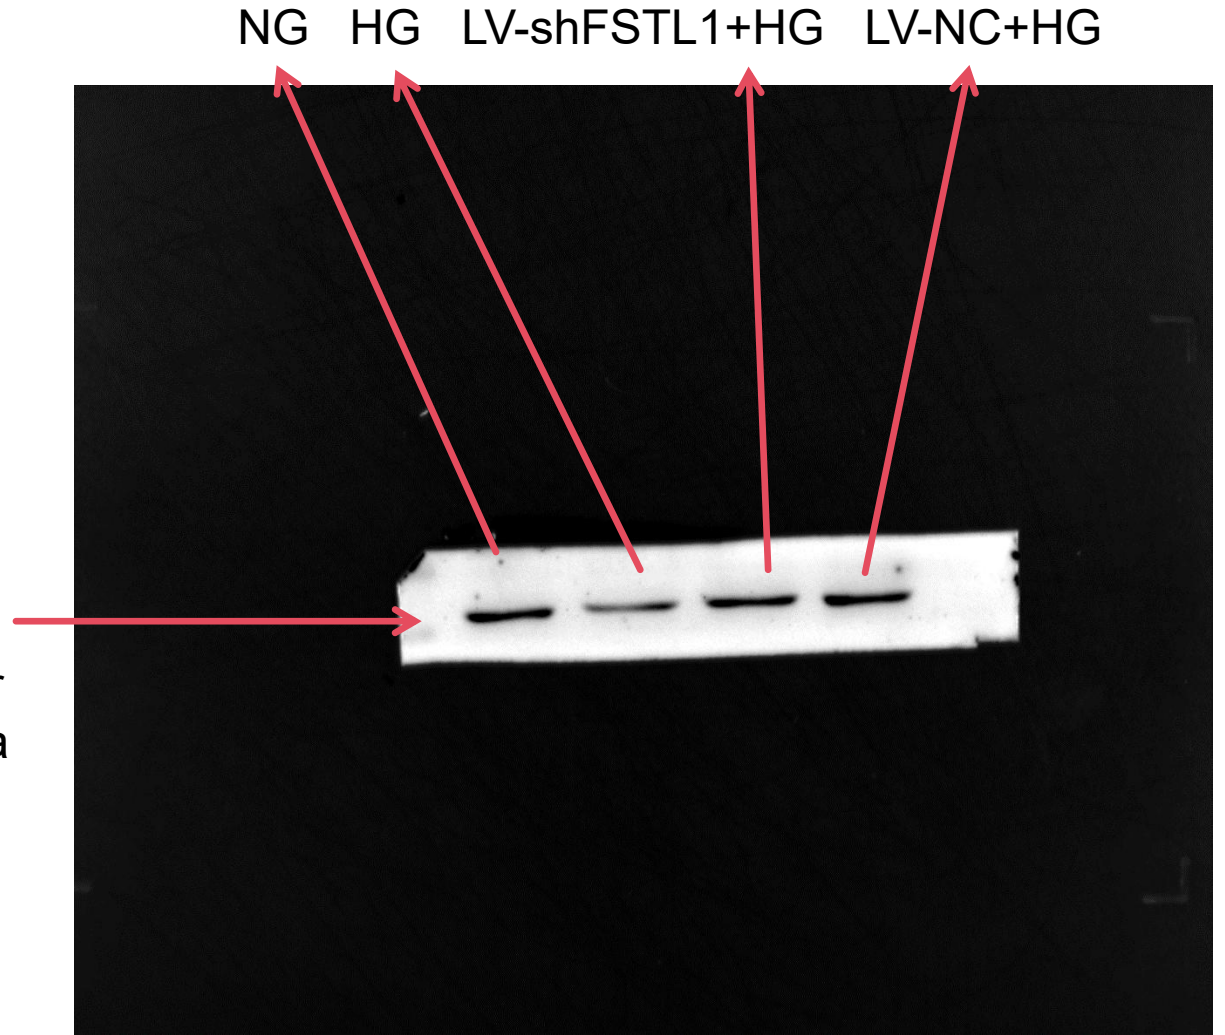

E-cadherin-120kDa

2023-03-03

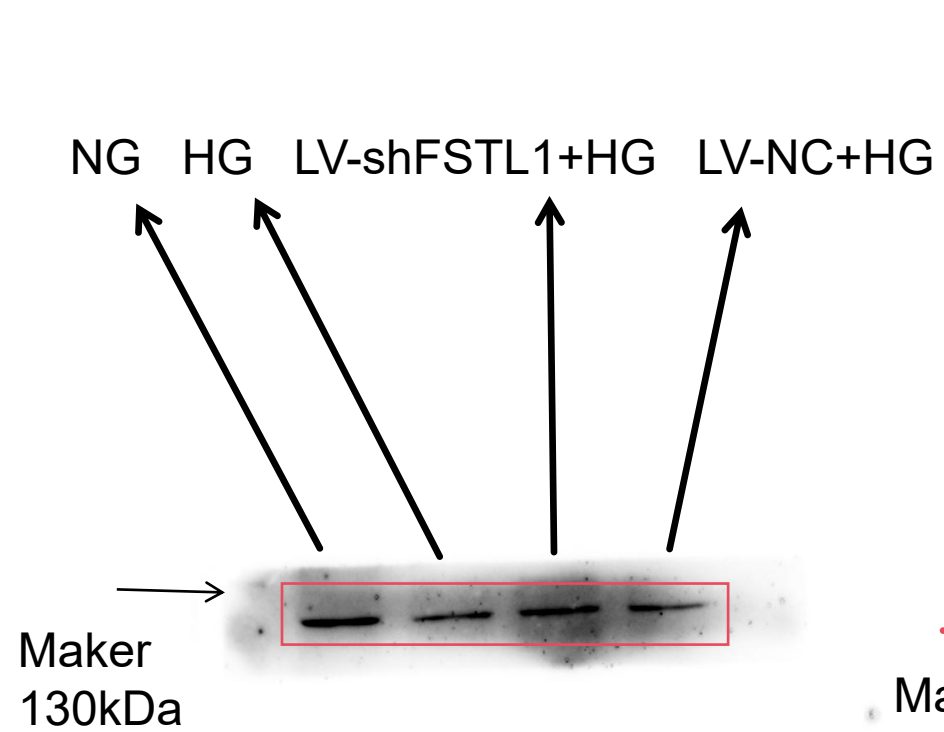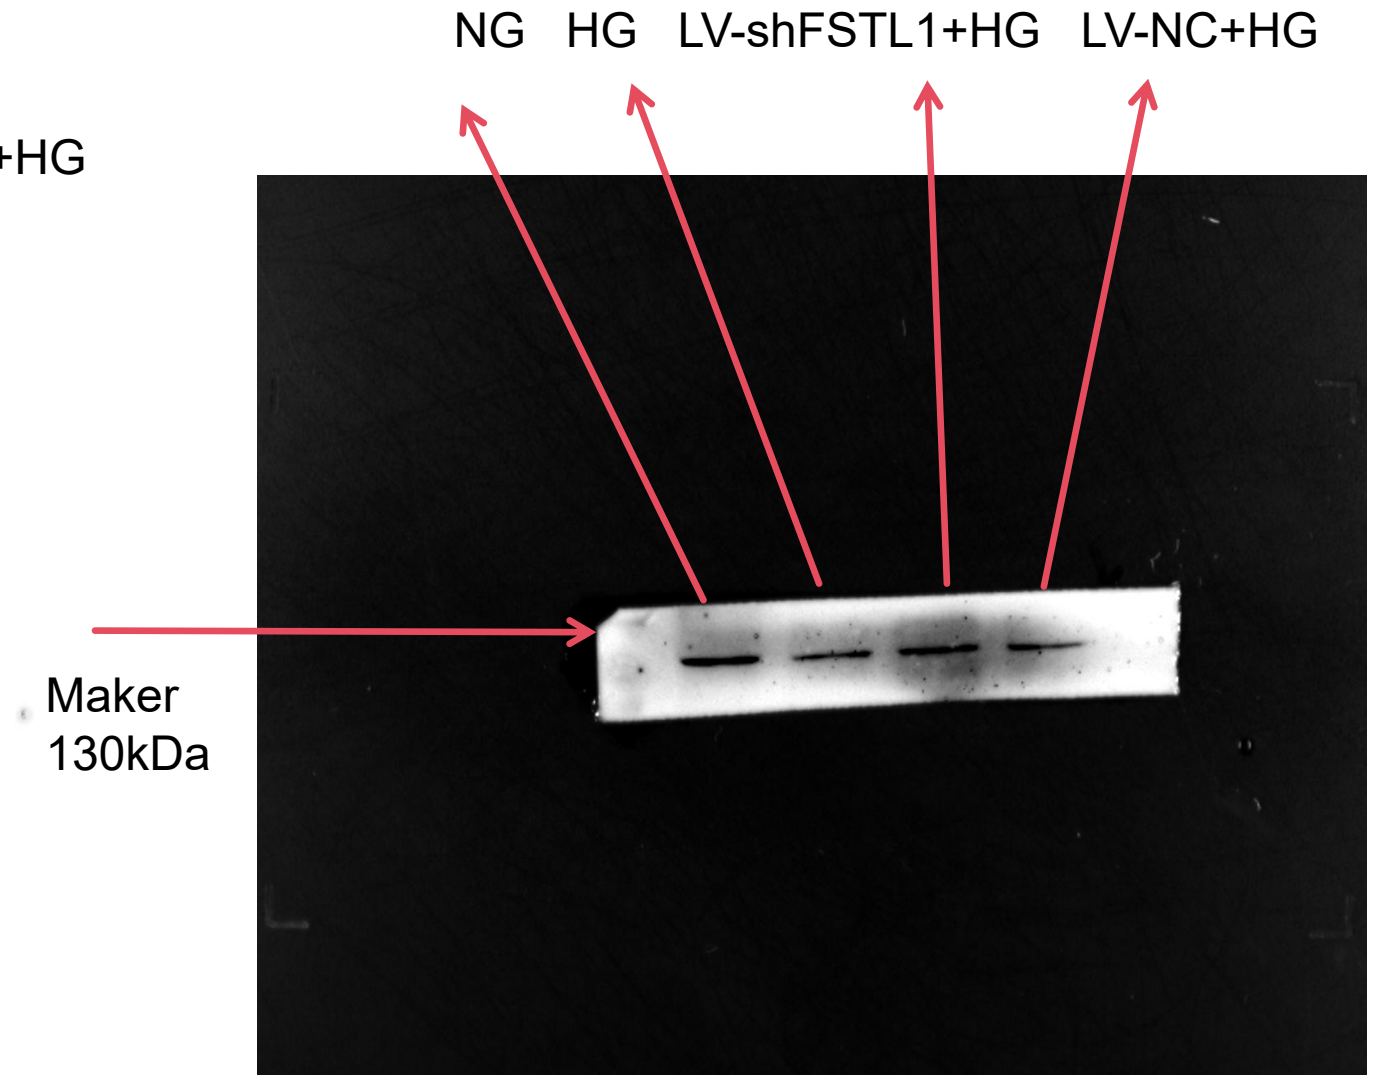

E-cadherin-120kDa

2023-03-26

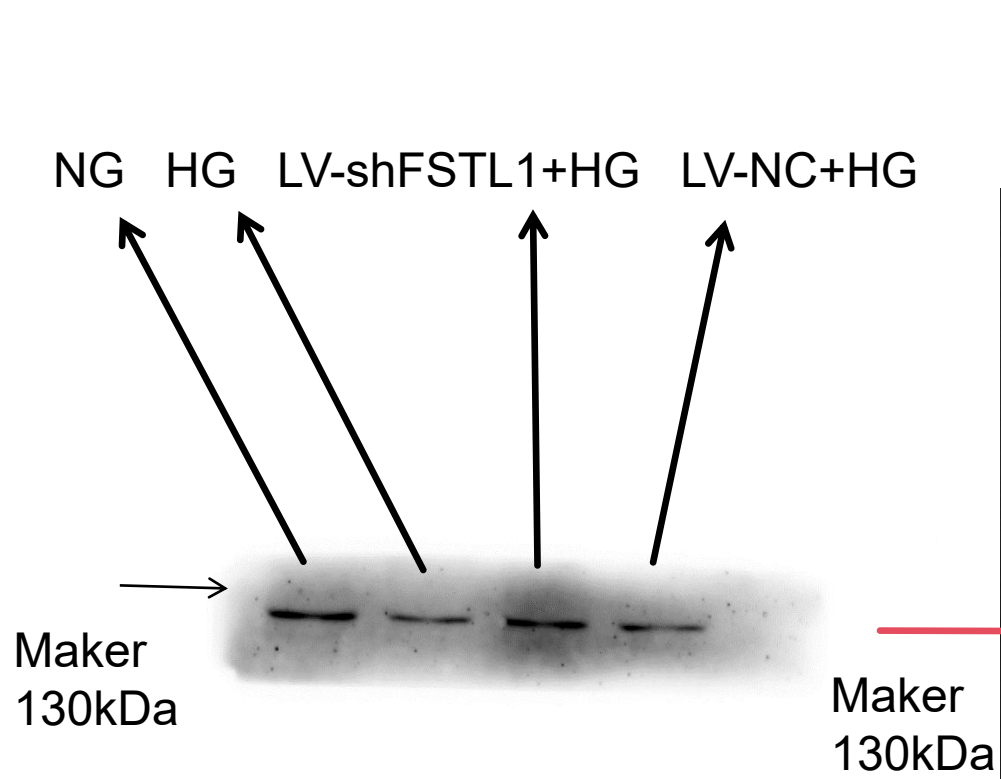

NG HG LV-shFSTL1+HG LV-NC+HG

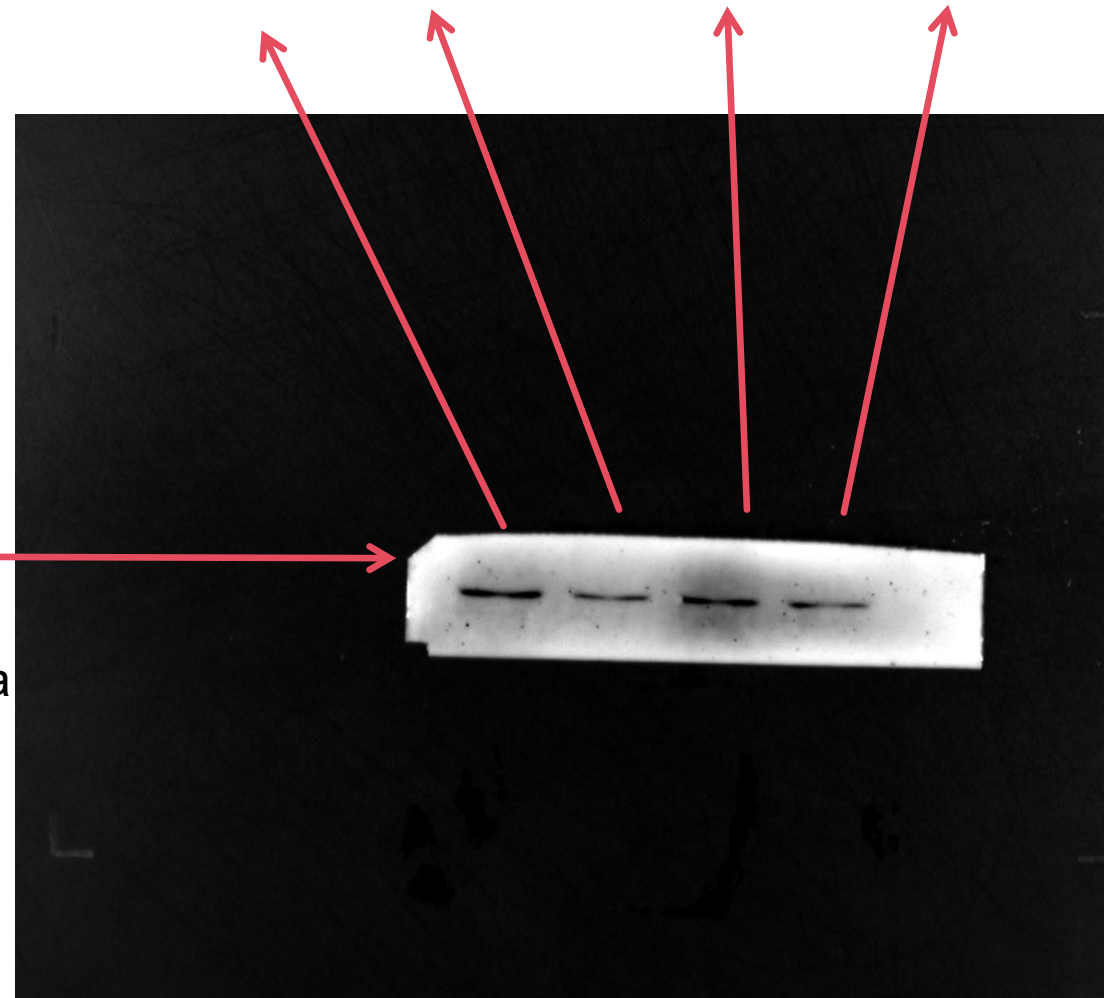

E-cadherin-120kDa

2023-04-02

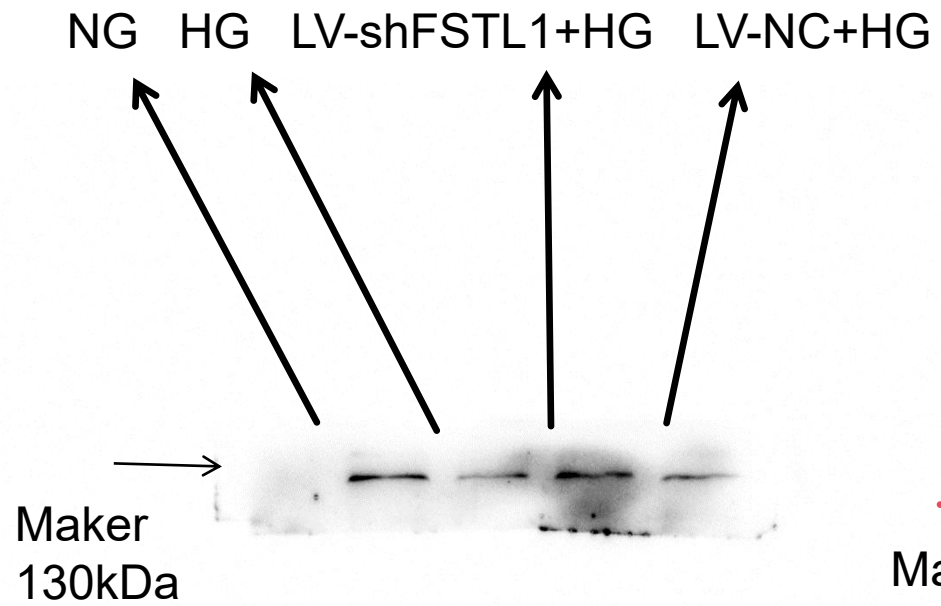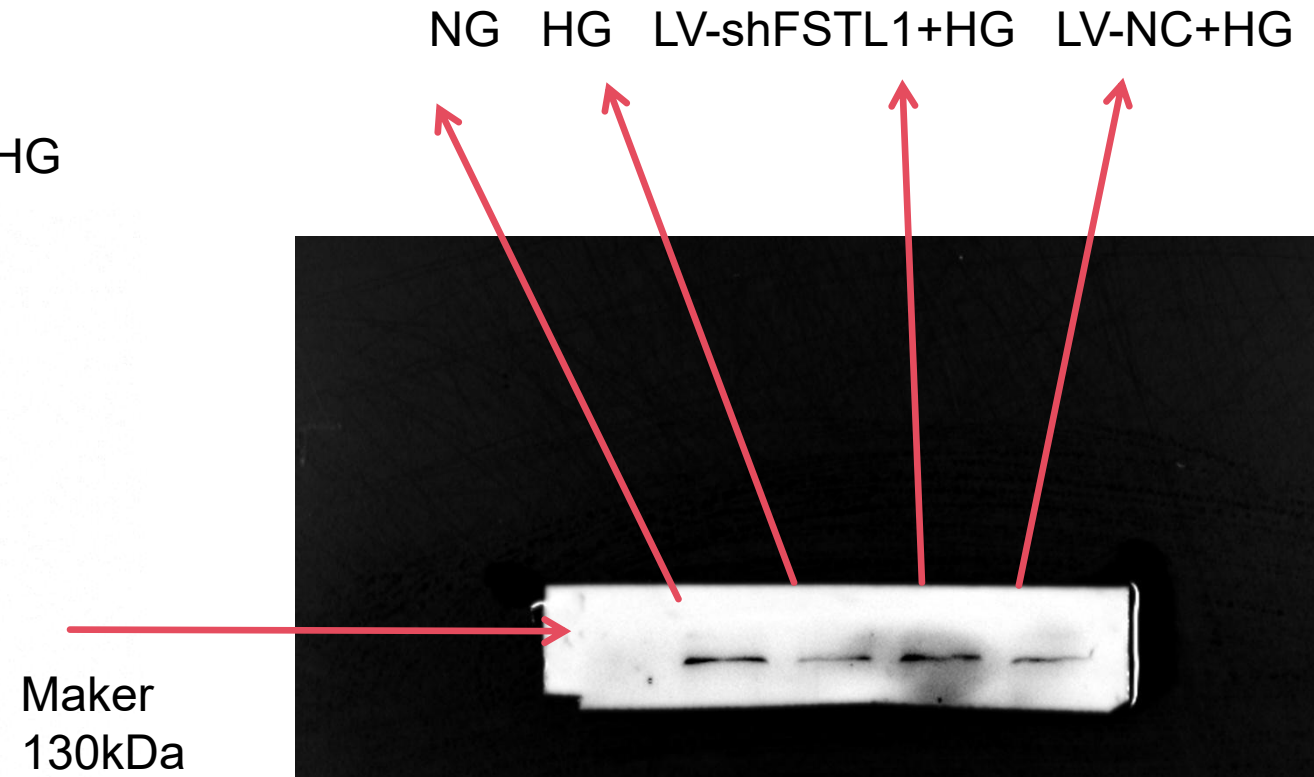



FN-263kDa

2023-04-04

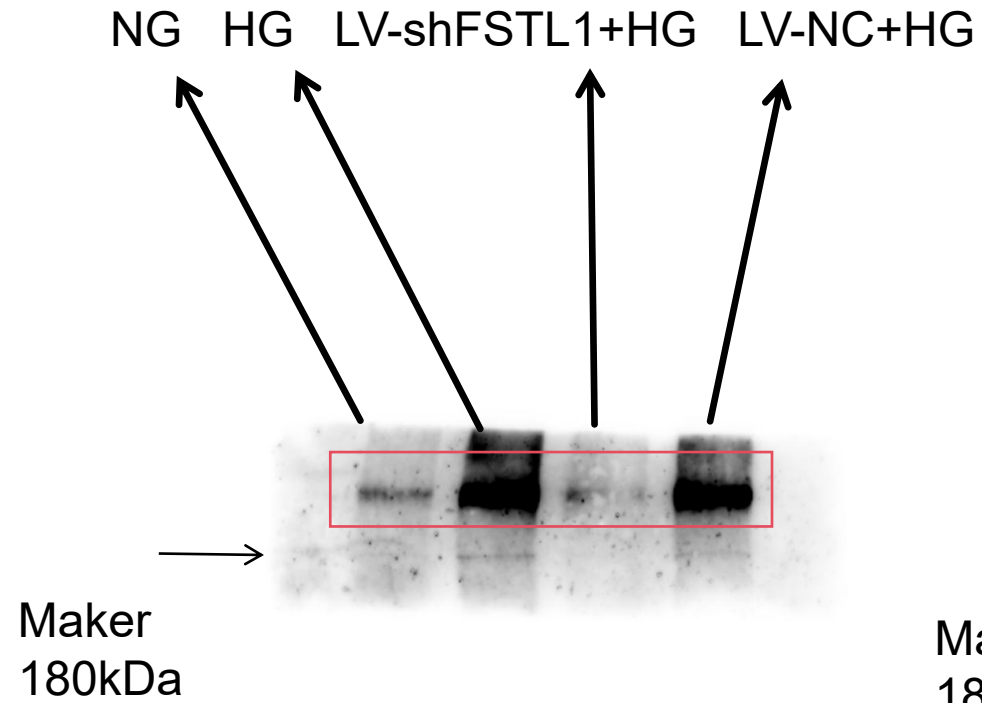

NG HG LV-shFSTL1+HG LV-NC+HG

Maker  
180kDa

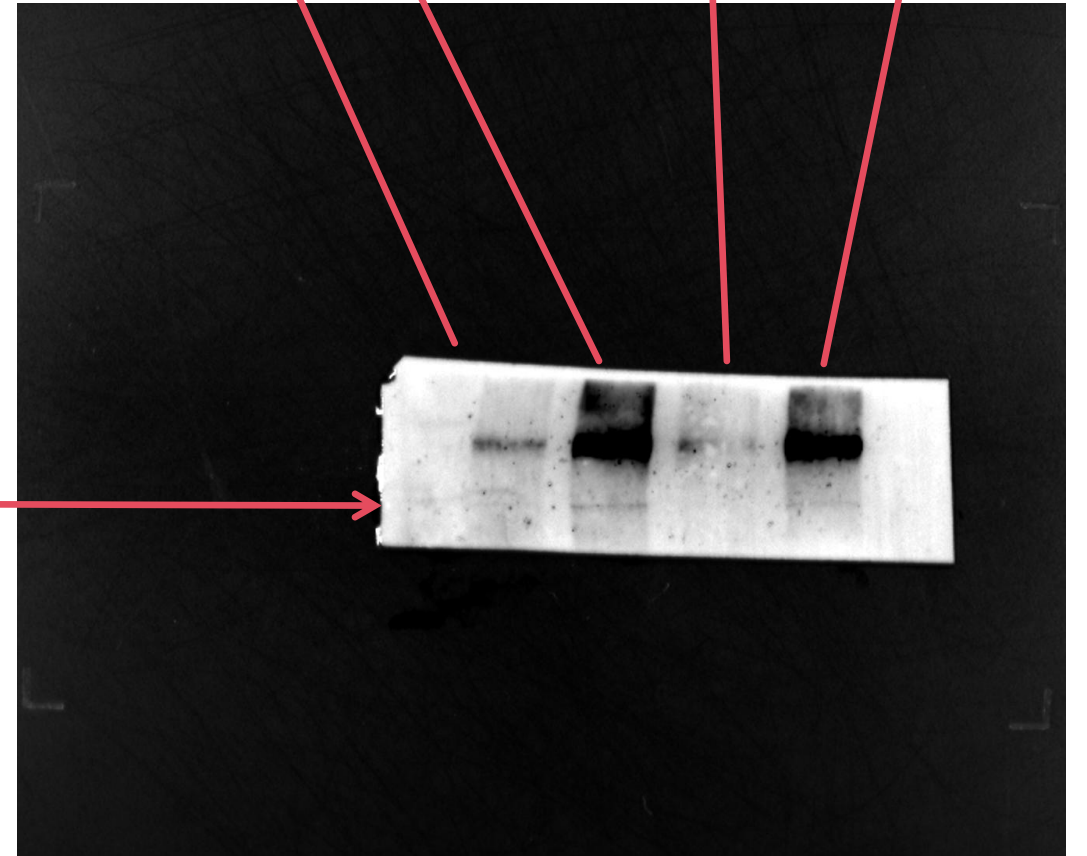

FN-263kDa

2023-04-21

NG HG LV-shFSTL1+HG LV-NC+HG

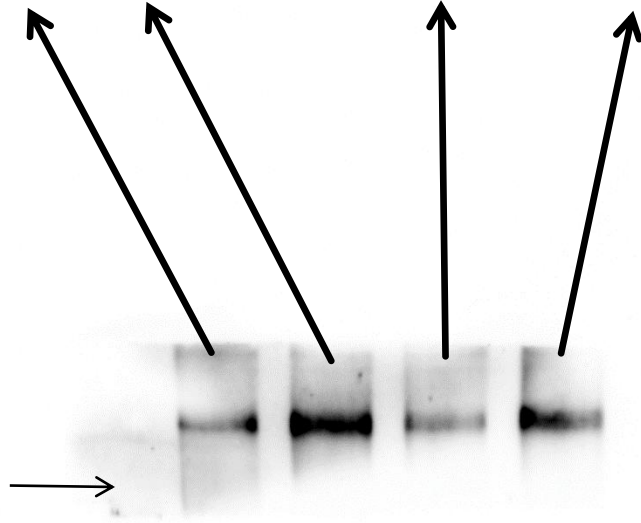

Maker  
180kDa

NG HG LV-shFSTL1+HG LV-NC+HG

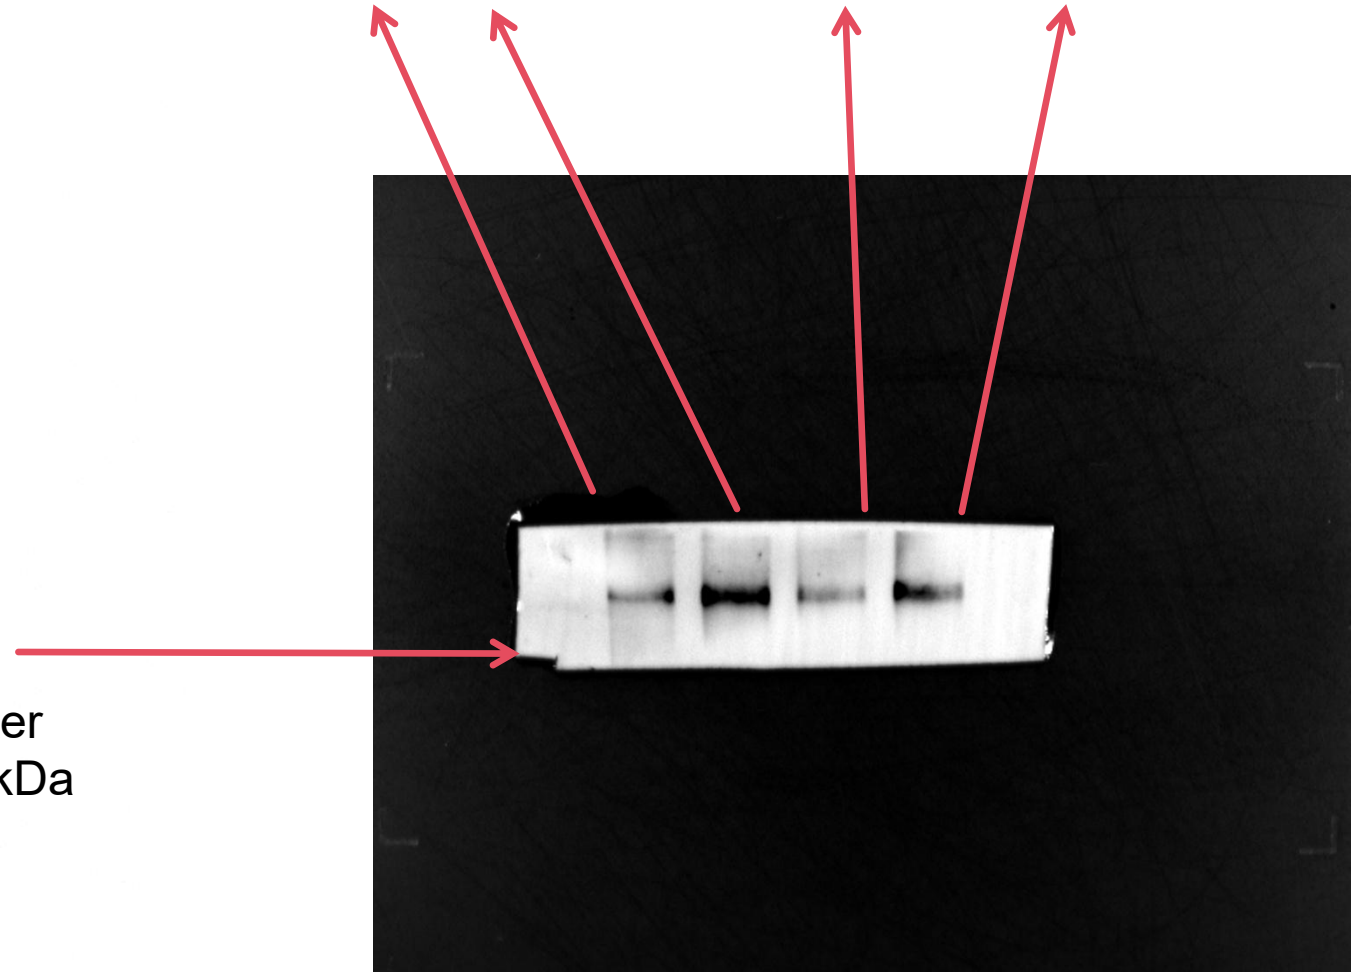

Maker  
180kDa

FN-263kDa

2023-05-01

NG HG LV-shFSTL1+HG LV-NC+HG

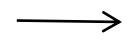

Maker  
180kDa

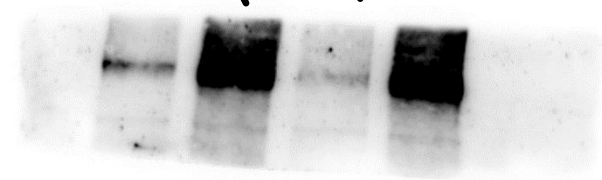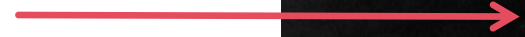

Maker  
180kDa

NG HG LV-shFSTL1+HG LV-NC+HG

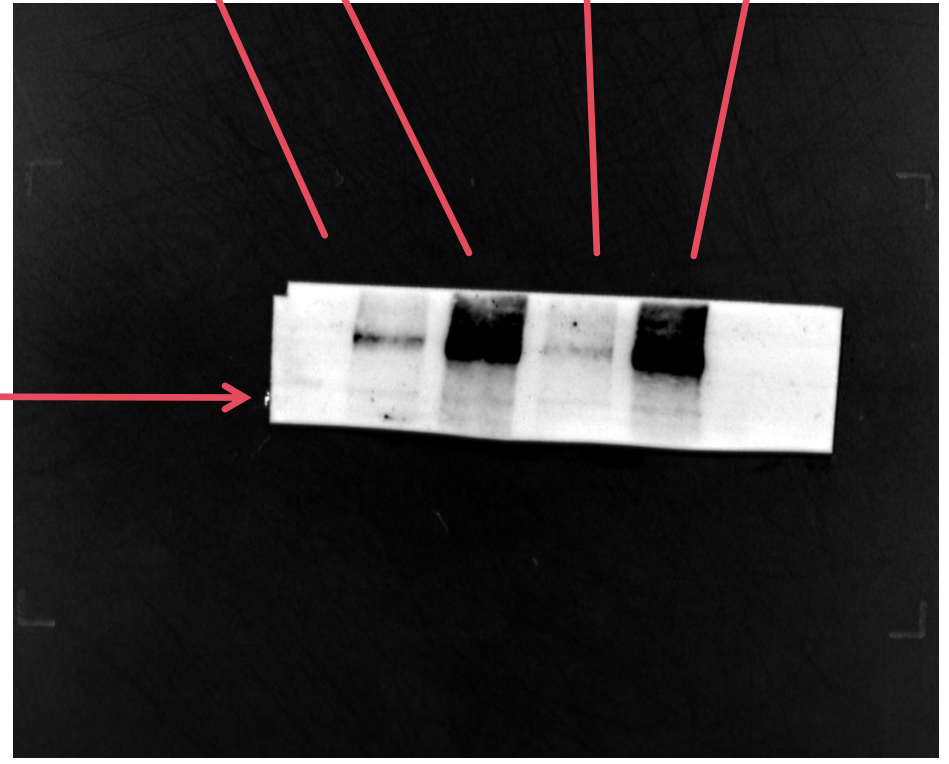

$\alpha$ -SMA-45kDa

2023-04-03

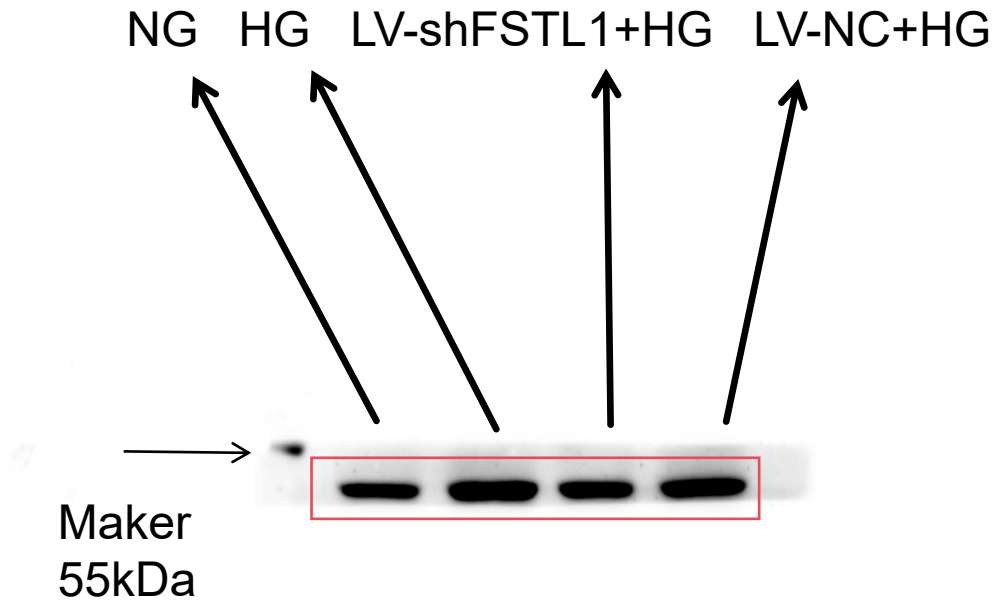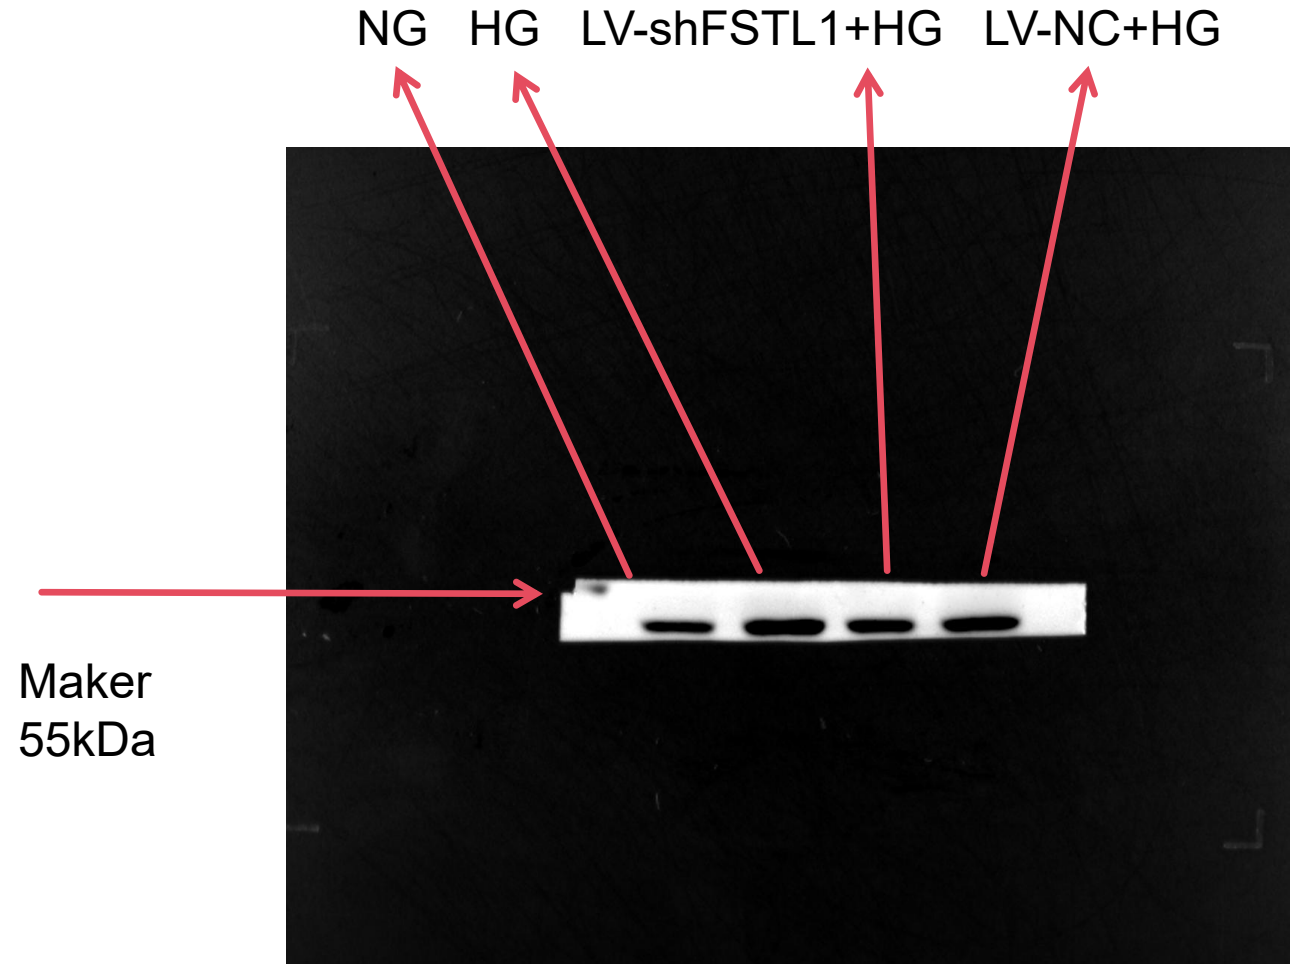

$\alpha$ -SMA-45kDa

2023-04-05

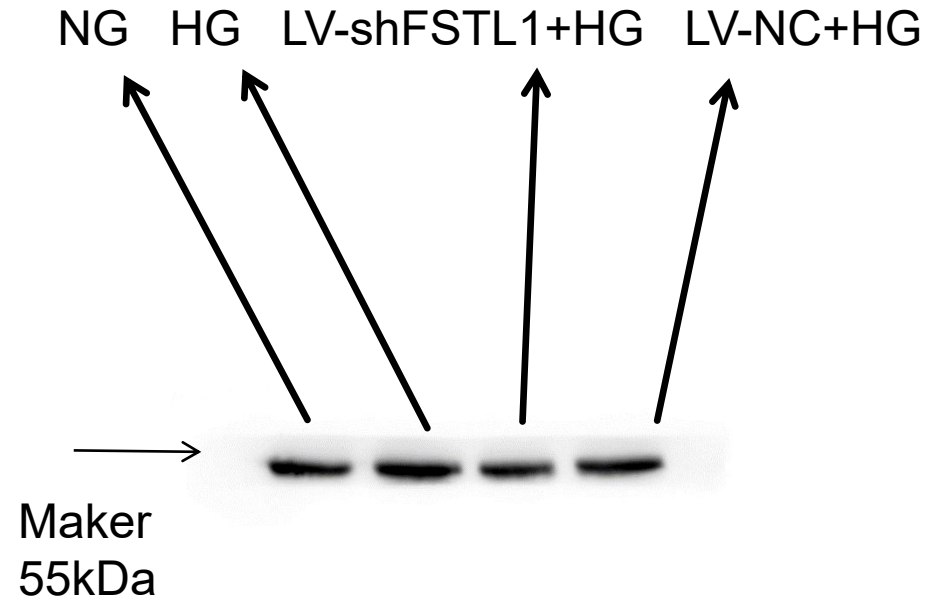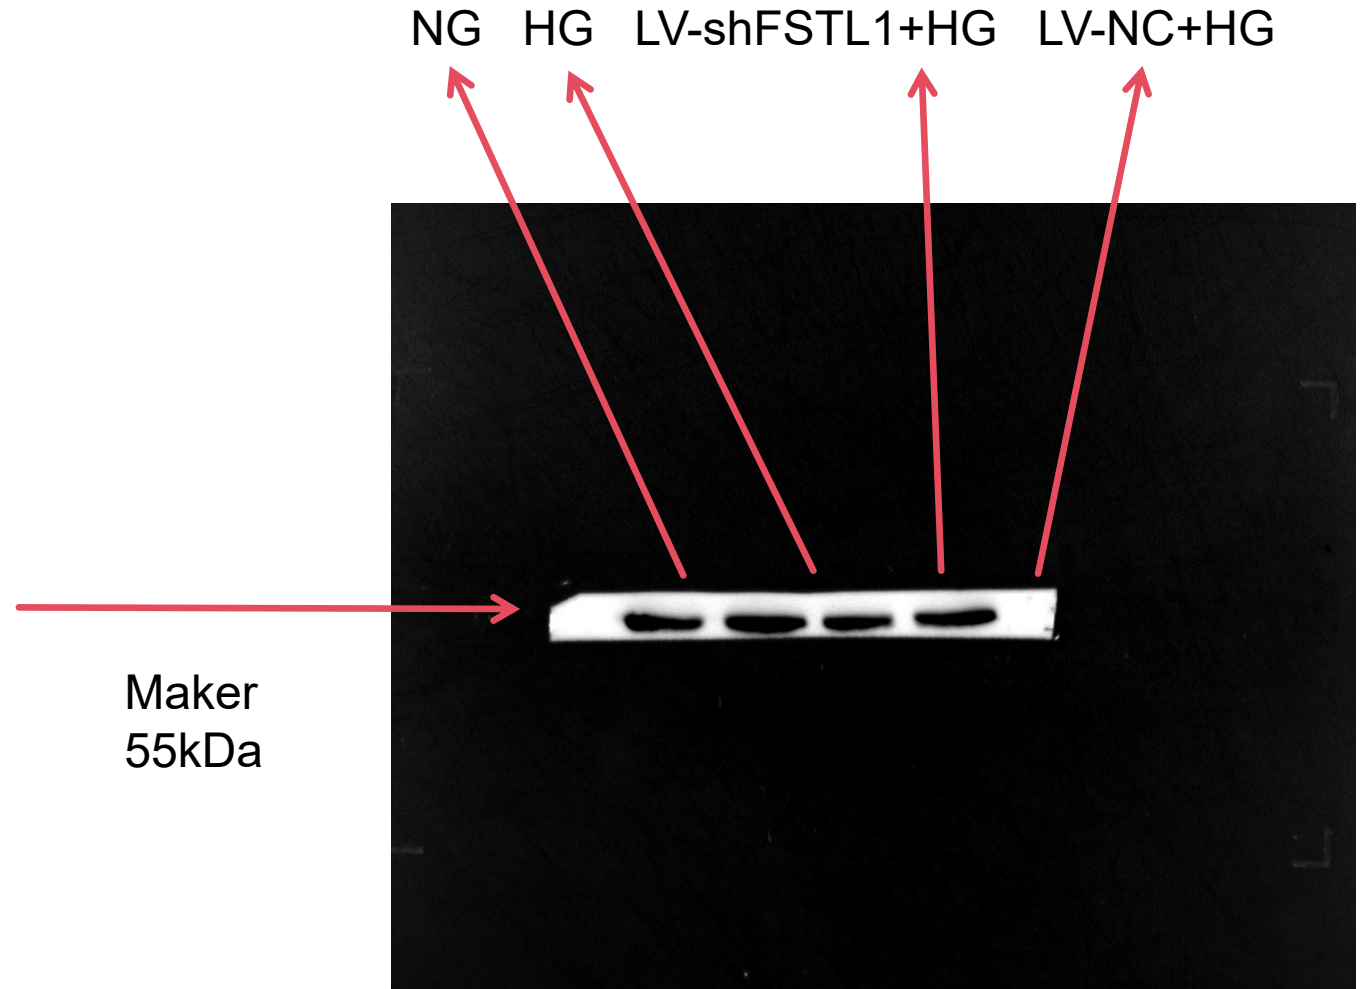

$\alpha$ -SMA-45kDa

2023-04-22

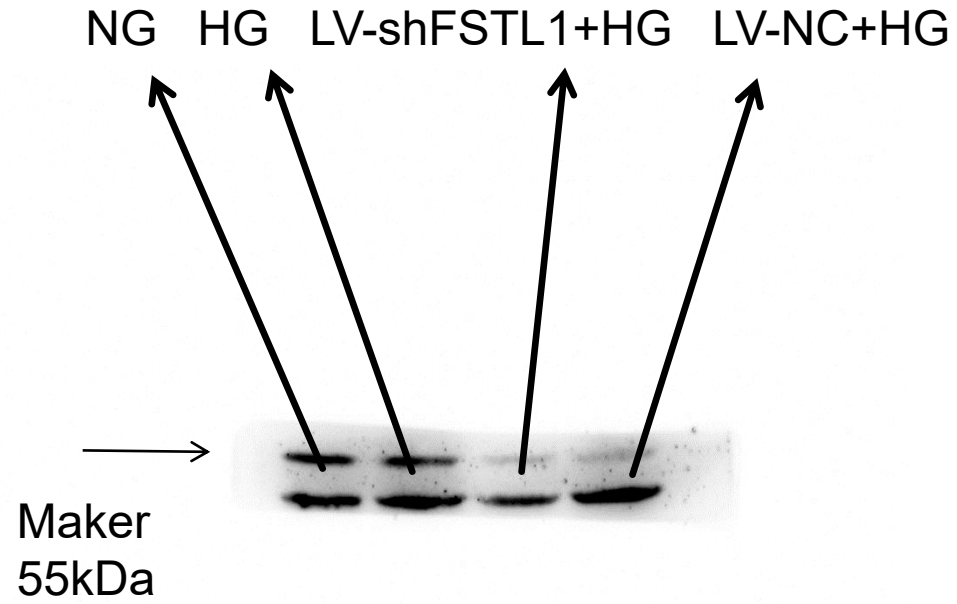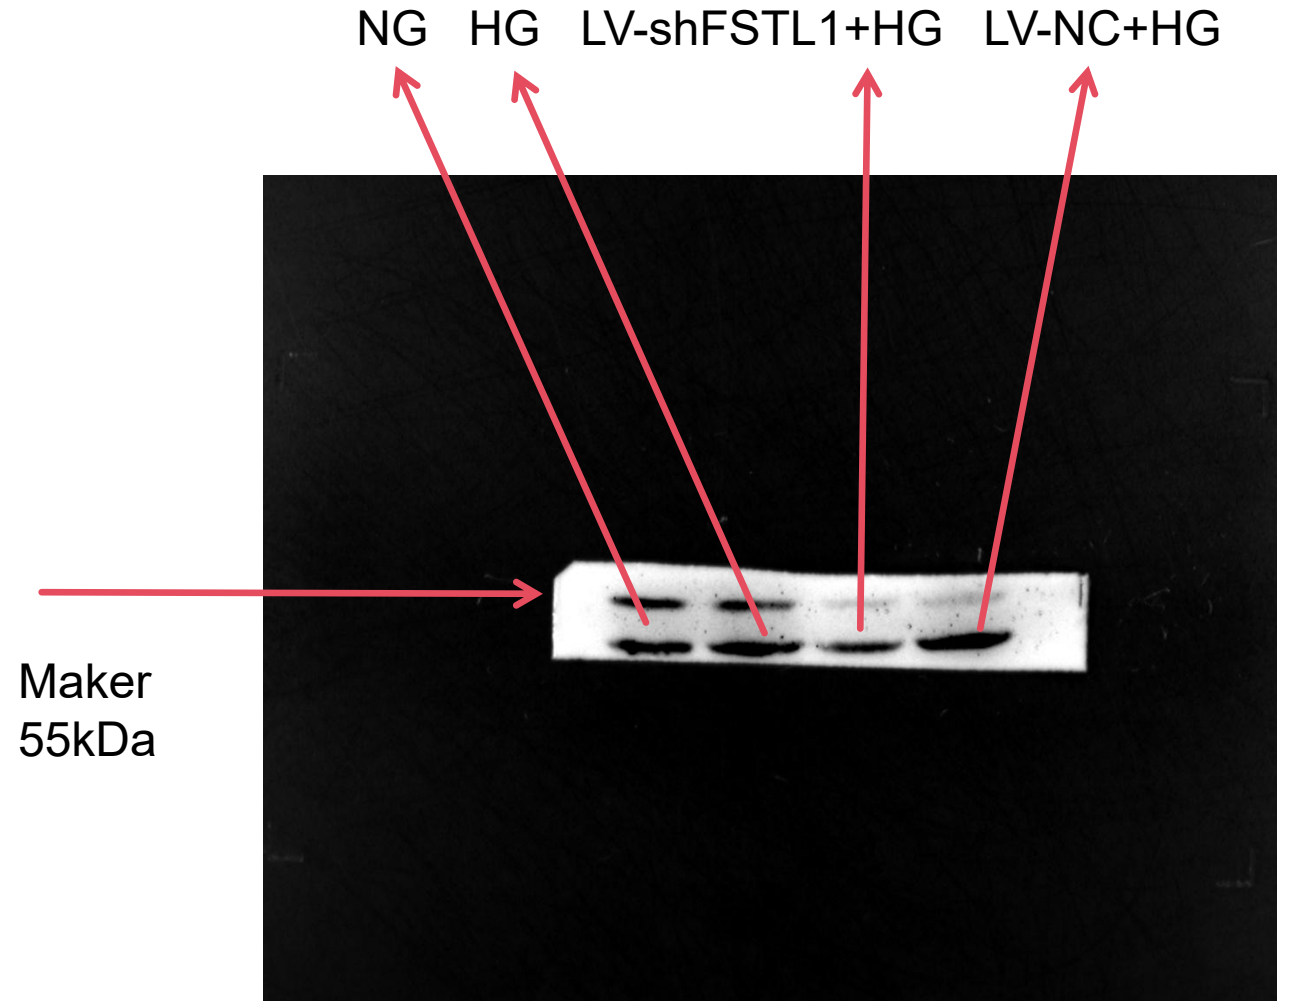

$\beta$ -actin

2023-04-16

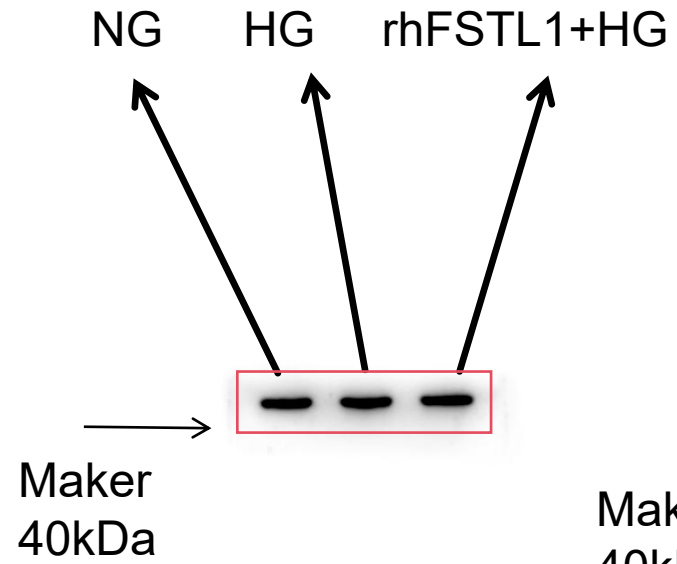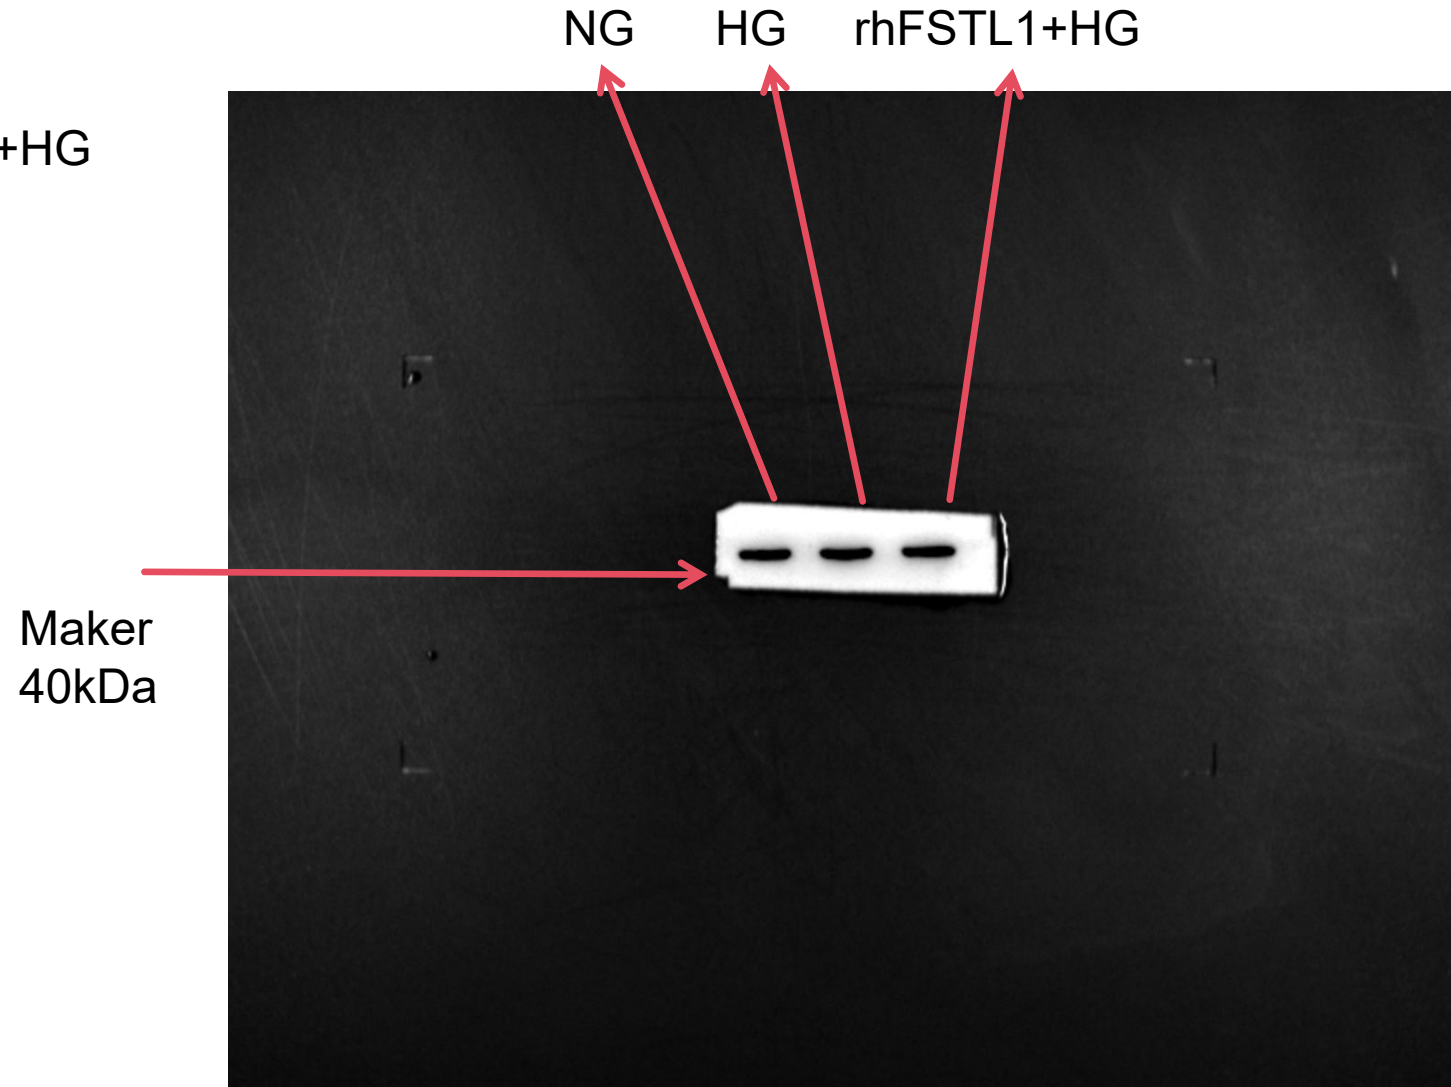

$\beta$ -actin

2023-05-03

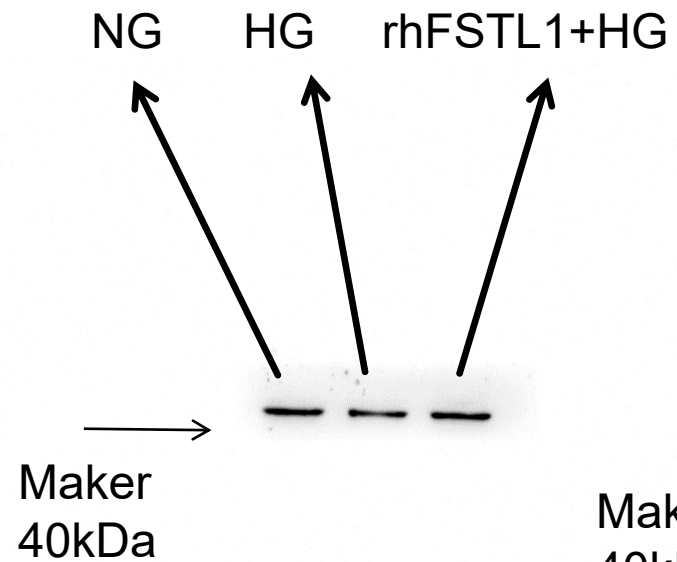

Maker  
40kDa

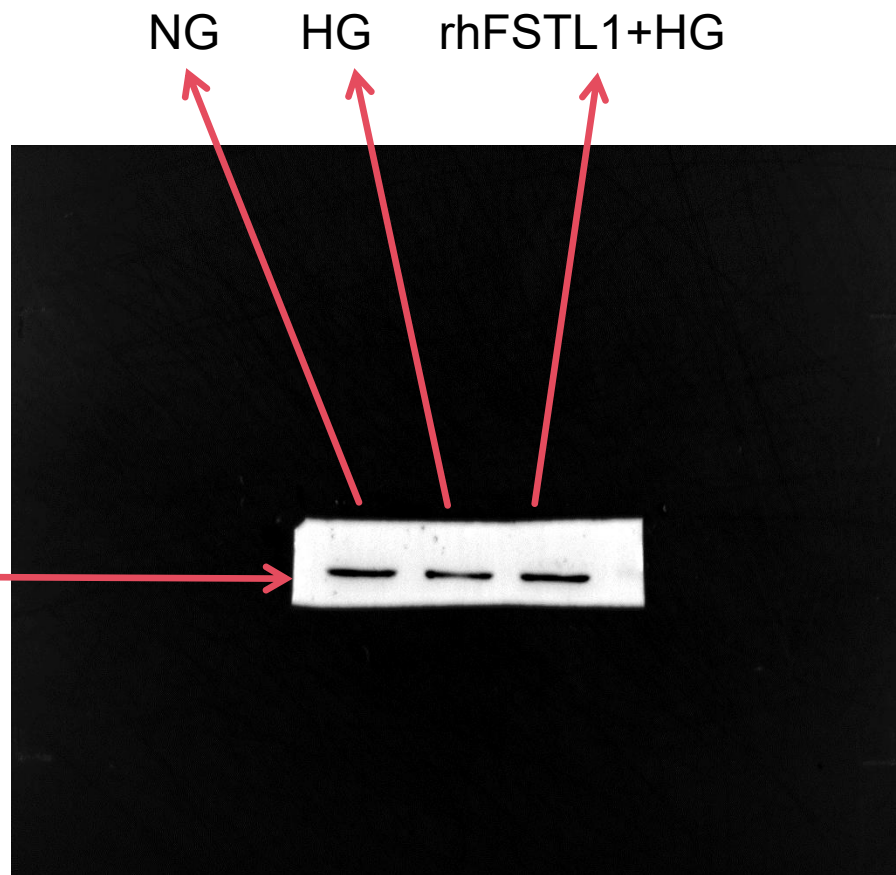



E-cadherin-120kDa

2023-04-21

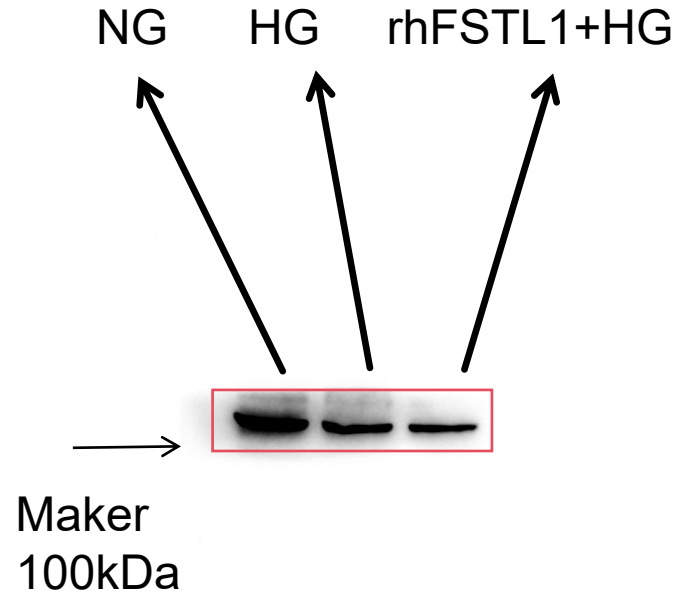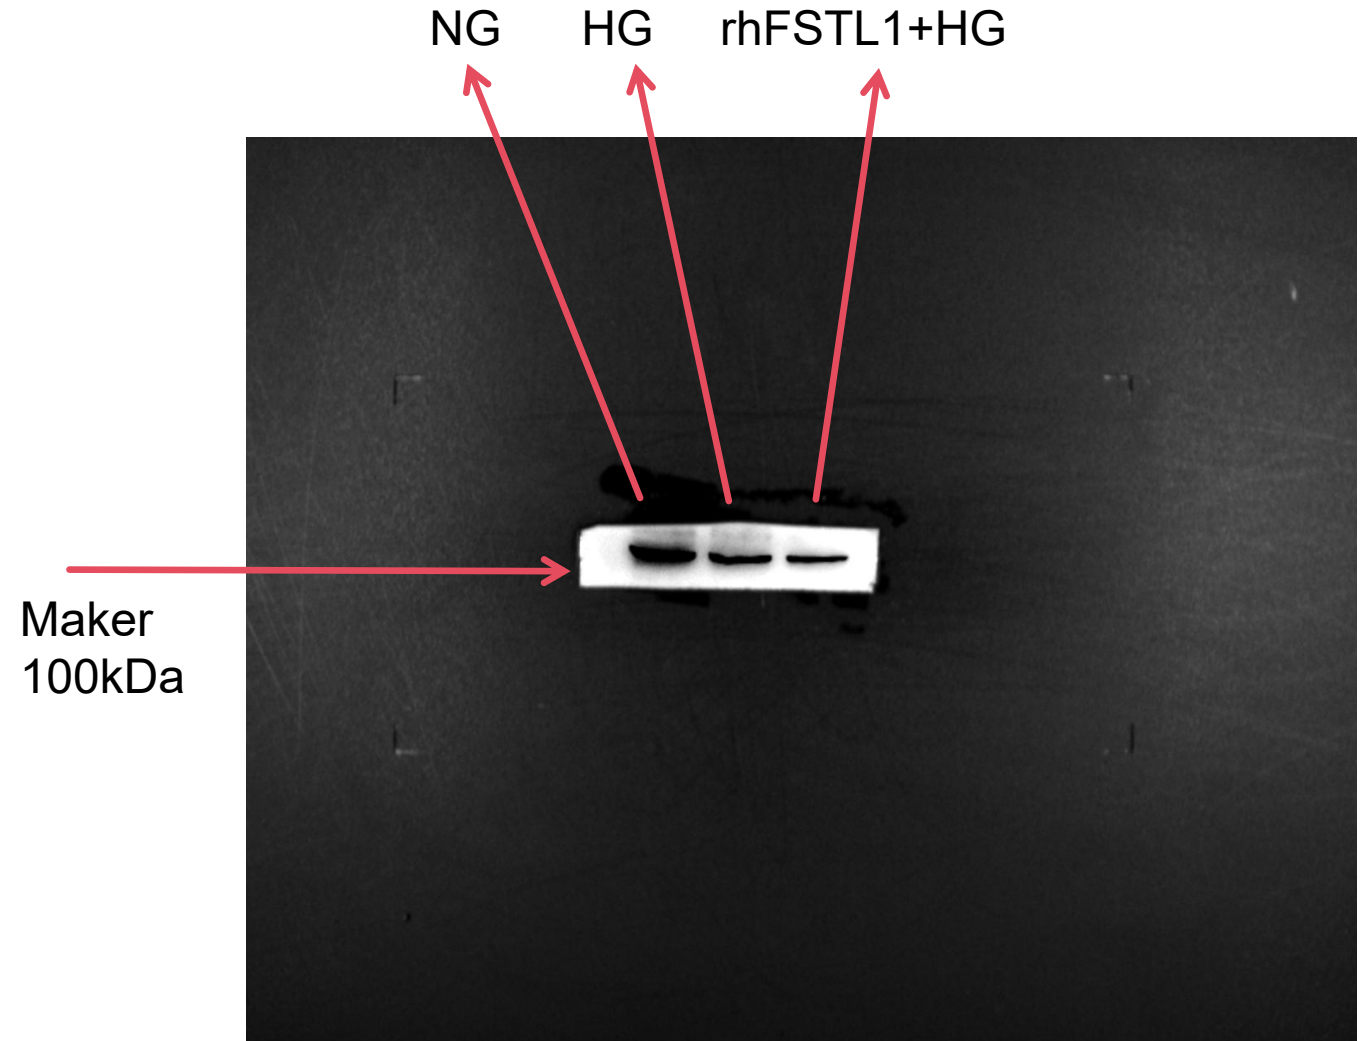

E-cadherin-120kDa

2023-04-29

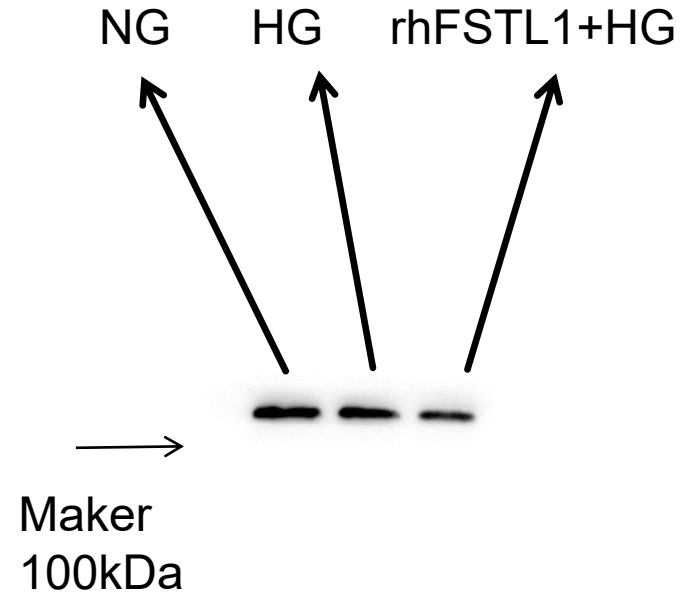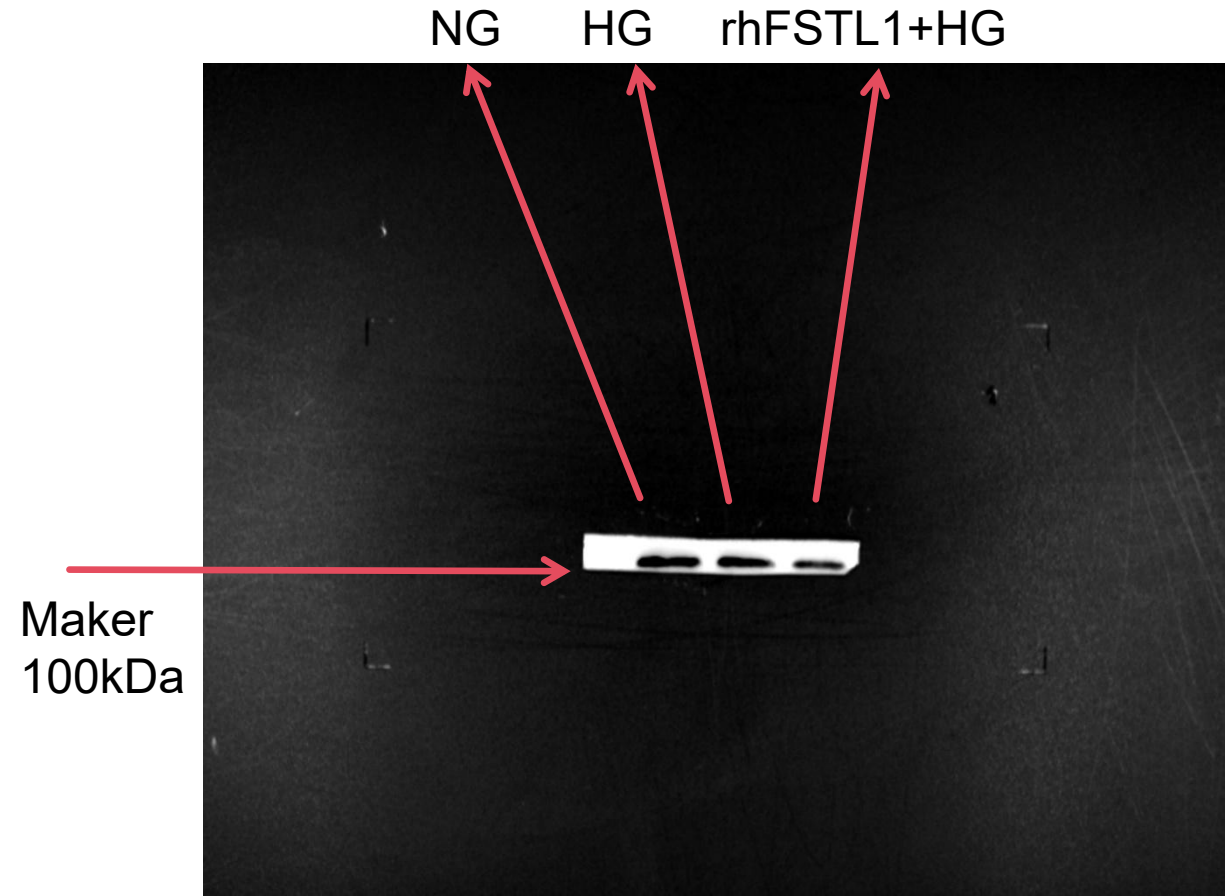

E-cadherin-120kDa

2023-05-16

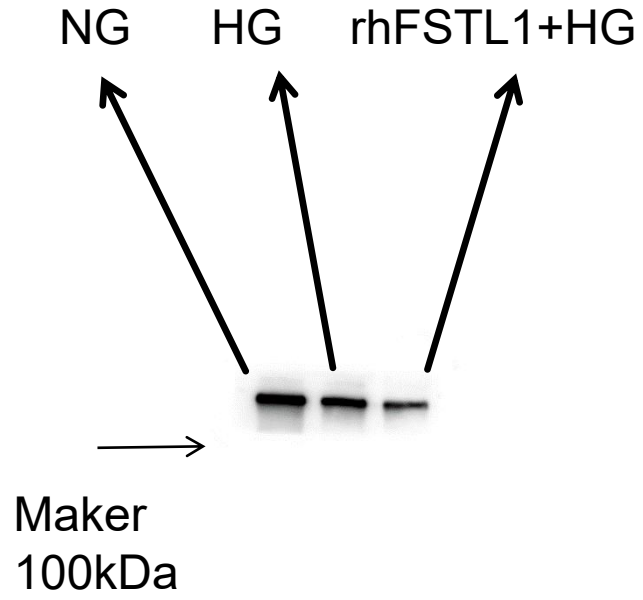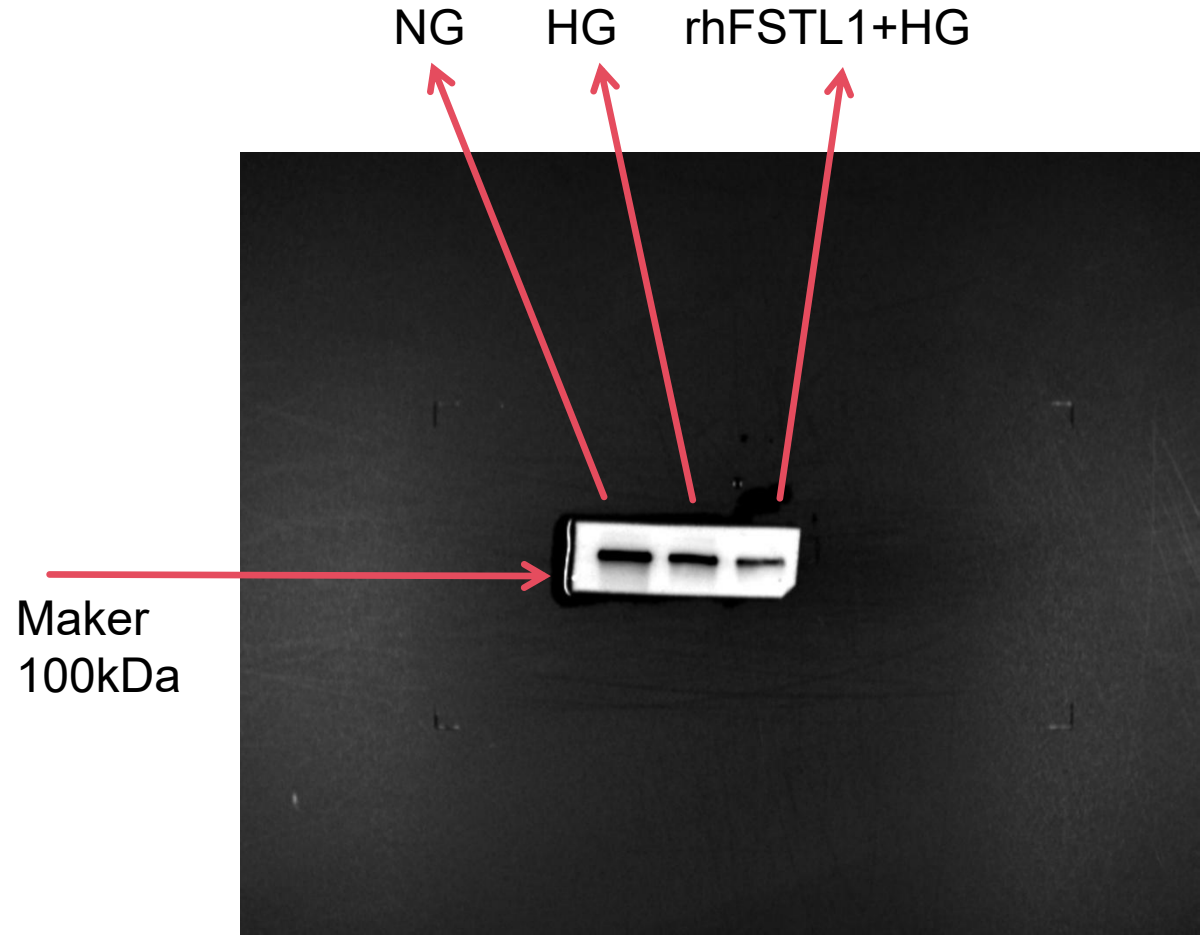

FN-263kDa

2023-05-29

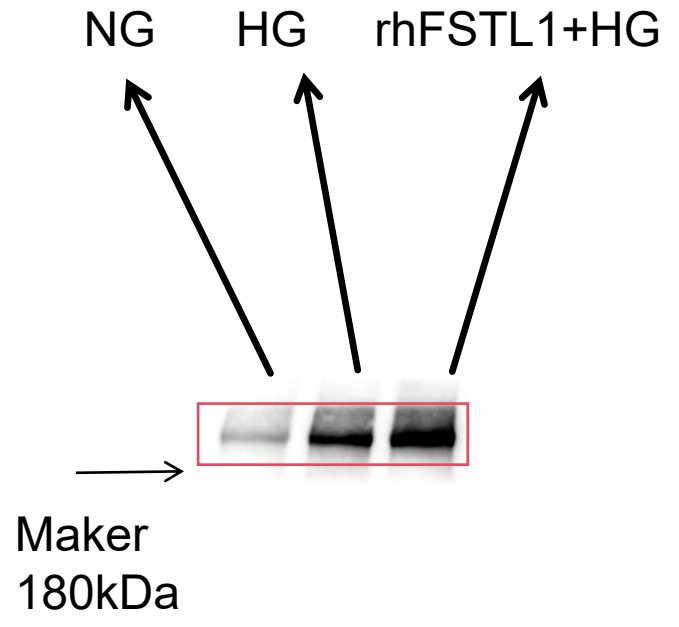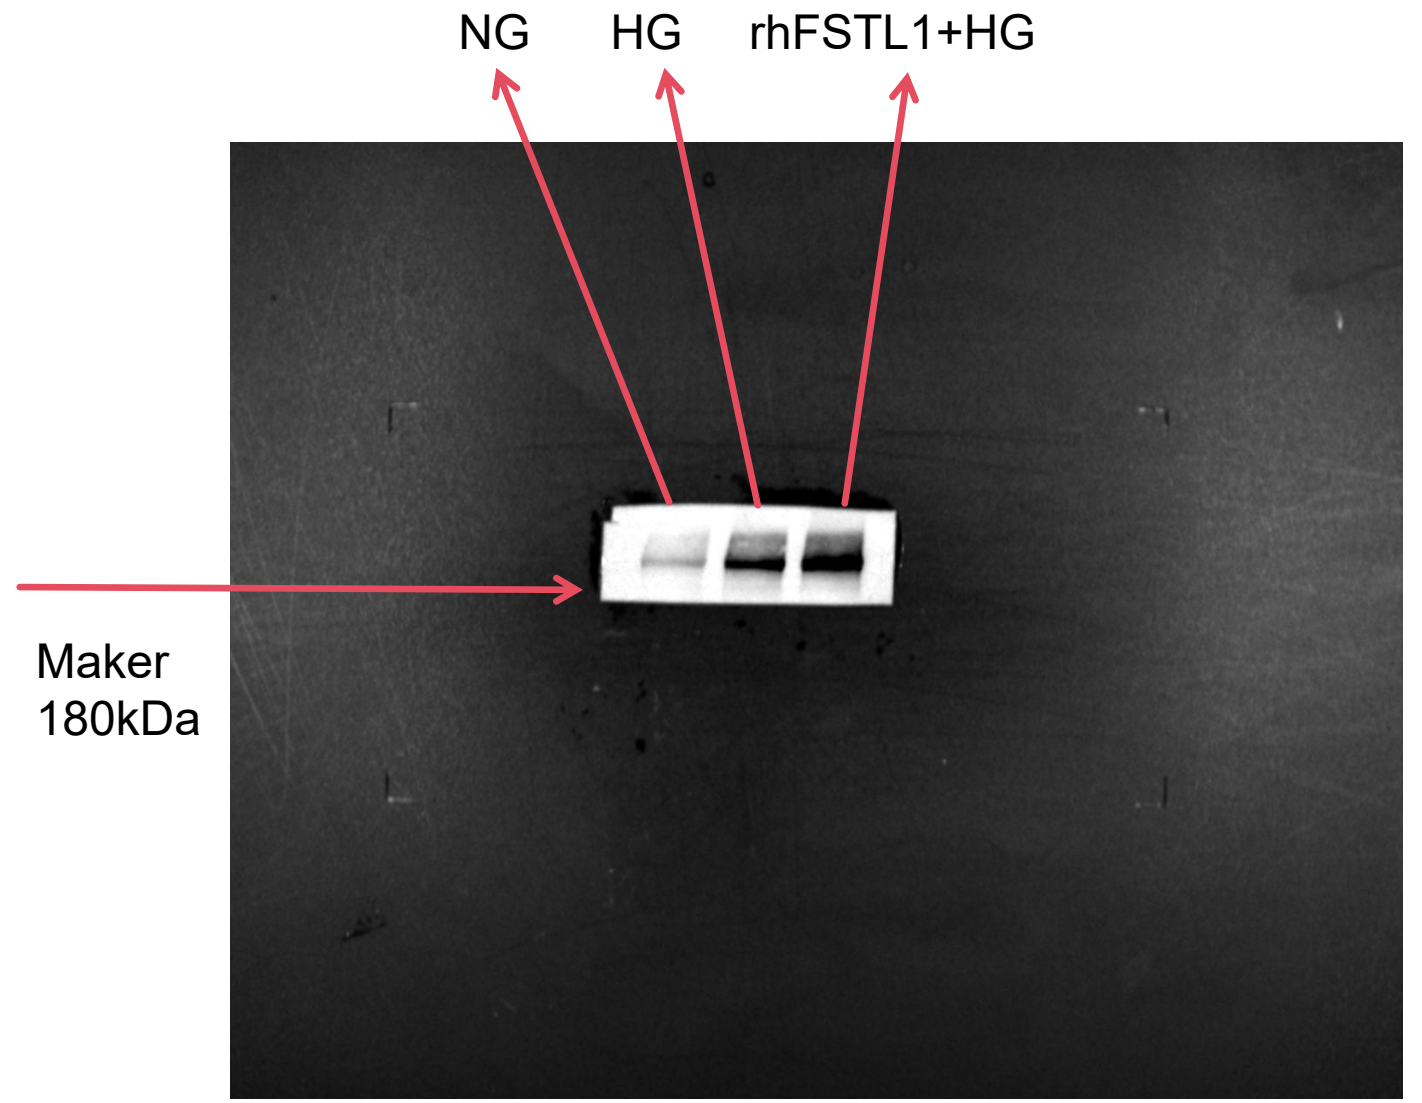

FN-263kDa

2023-06-05

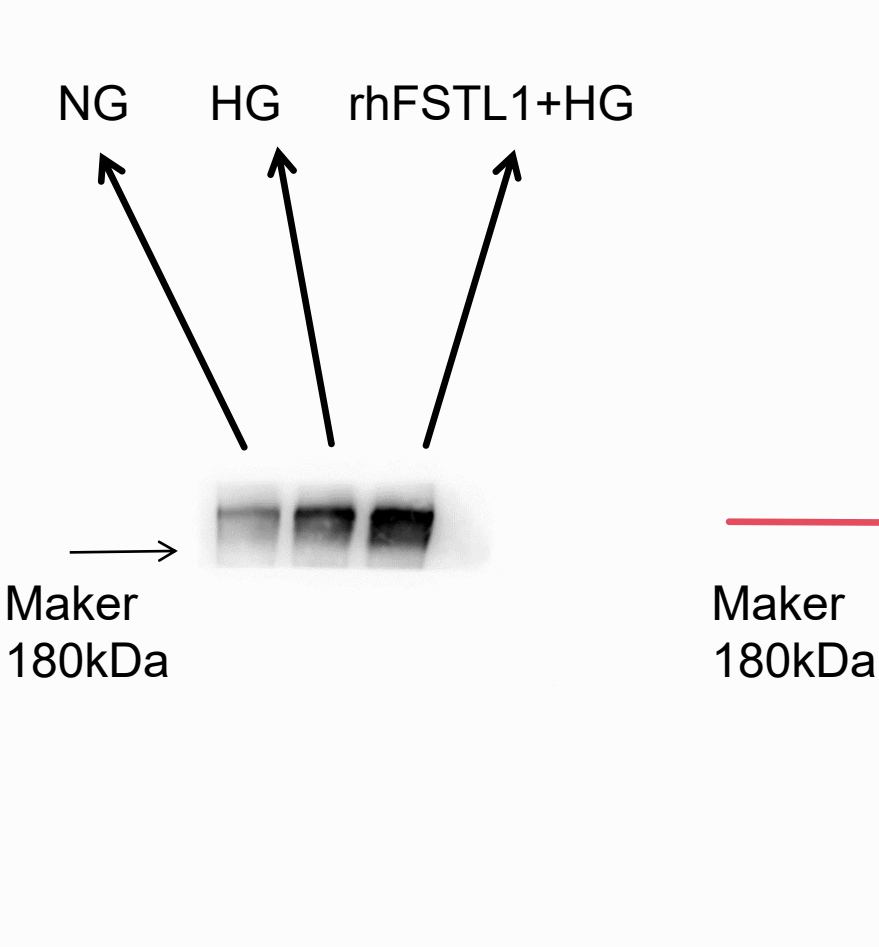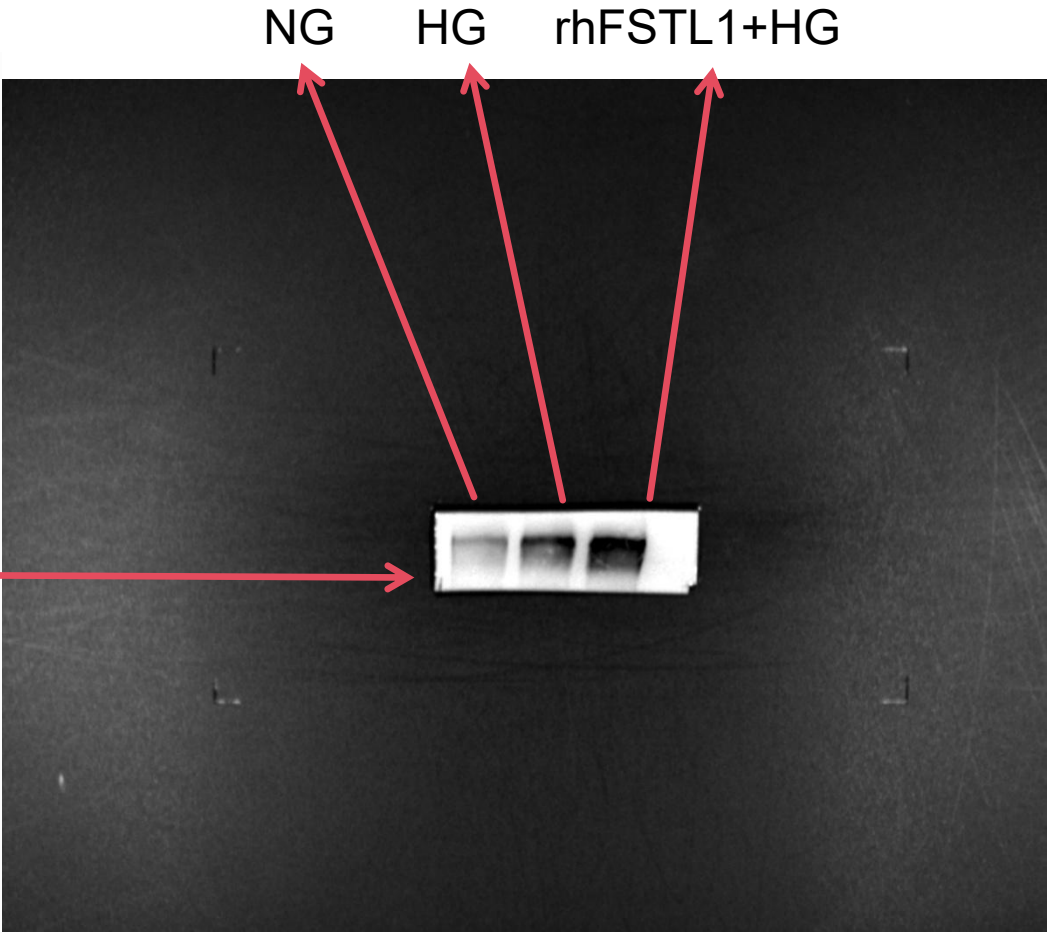

FN-263kDa

2023-06-13

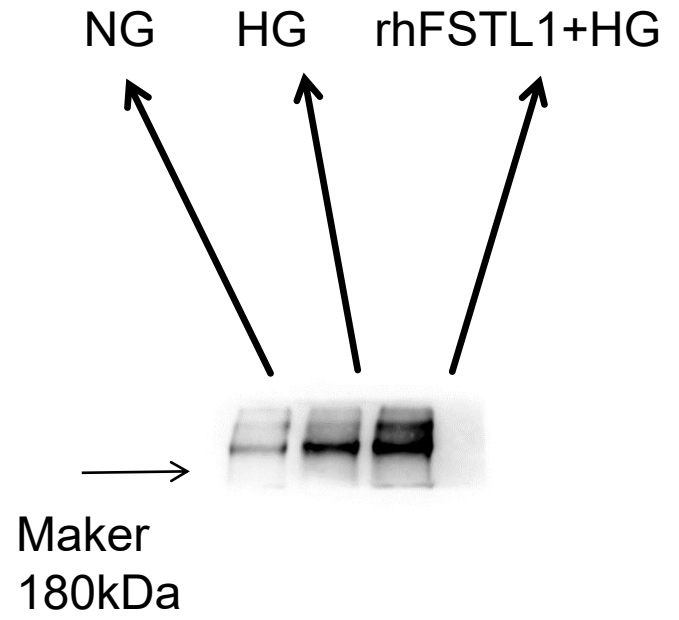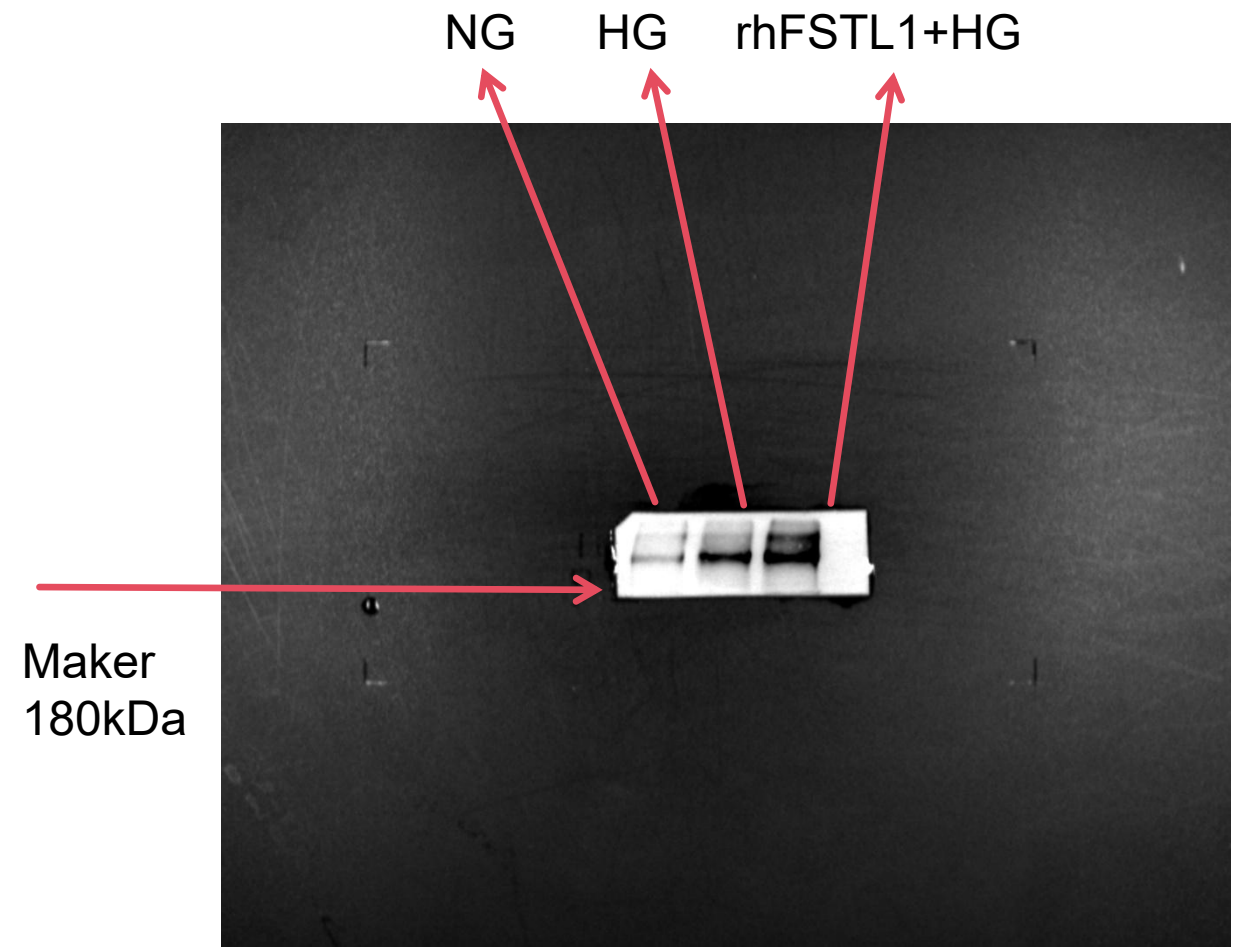

$\alpha$ -SMA-45kDa

2023-06-23

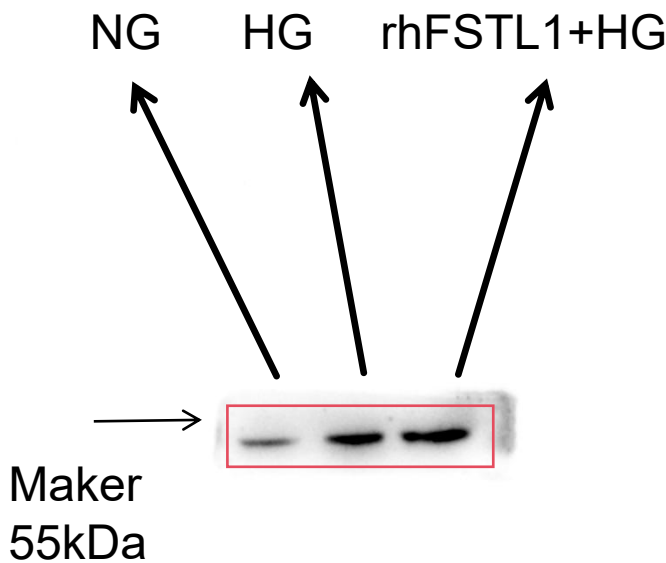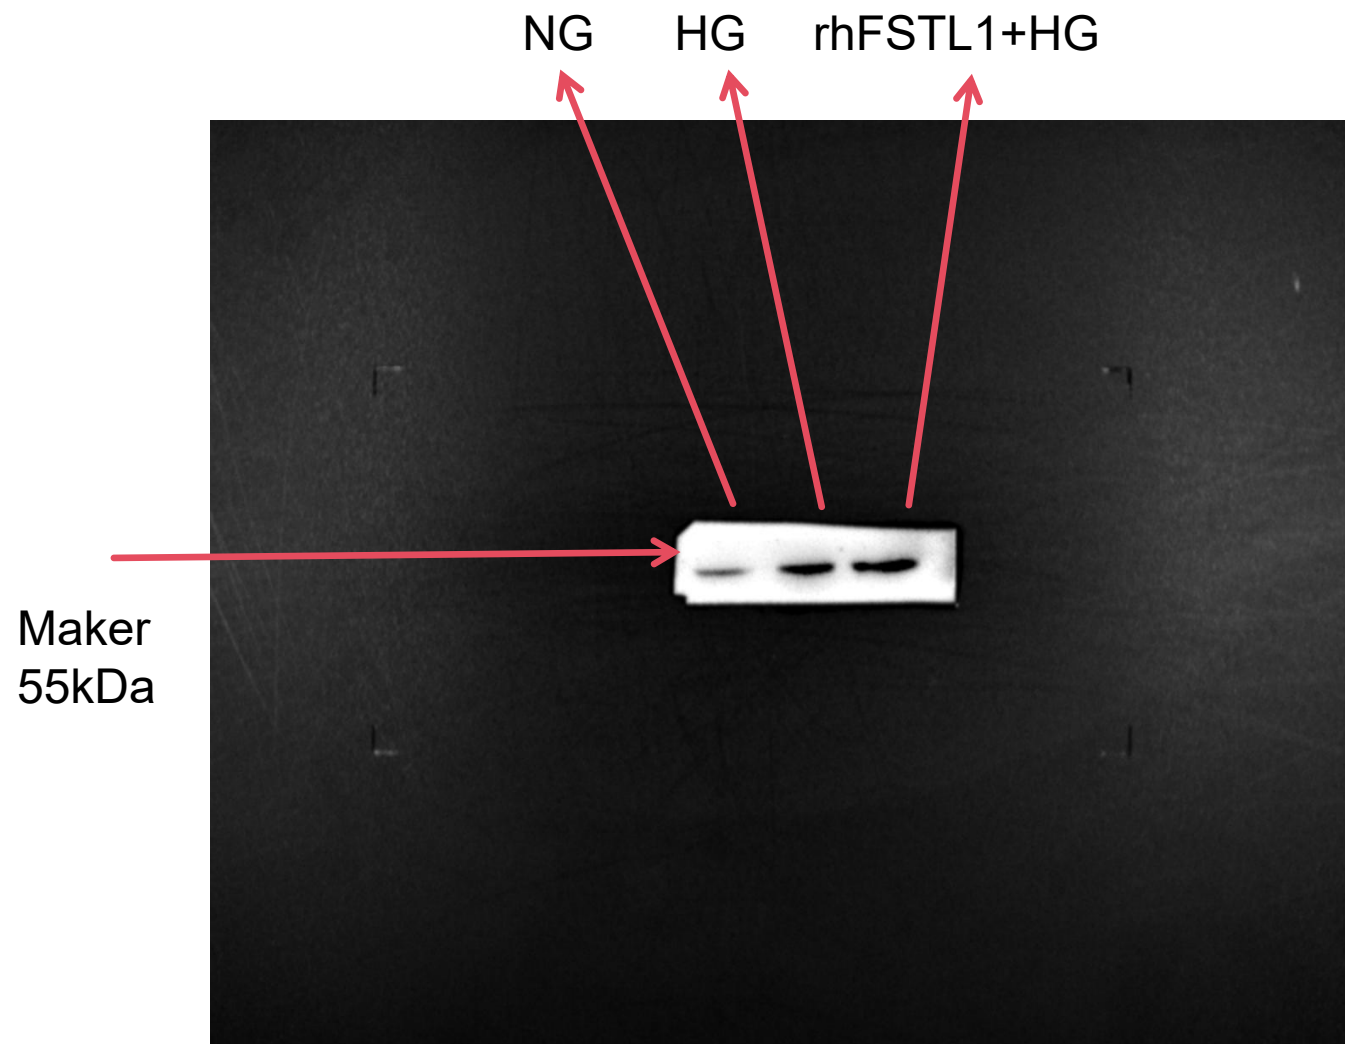

$\alpha$ -SMA-45kDa

2023-06-05

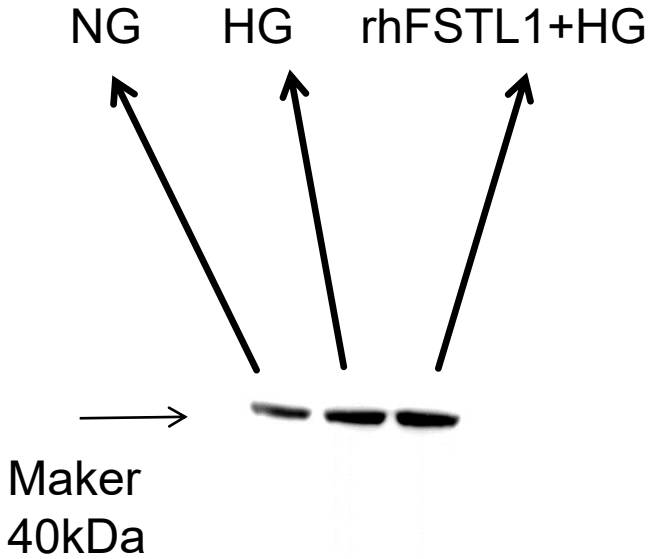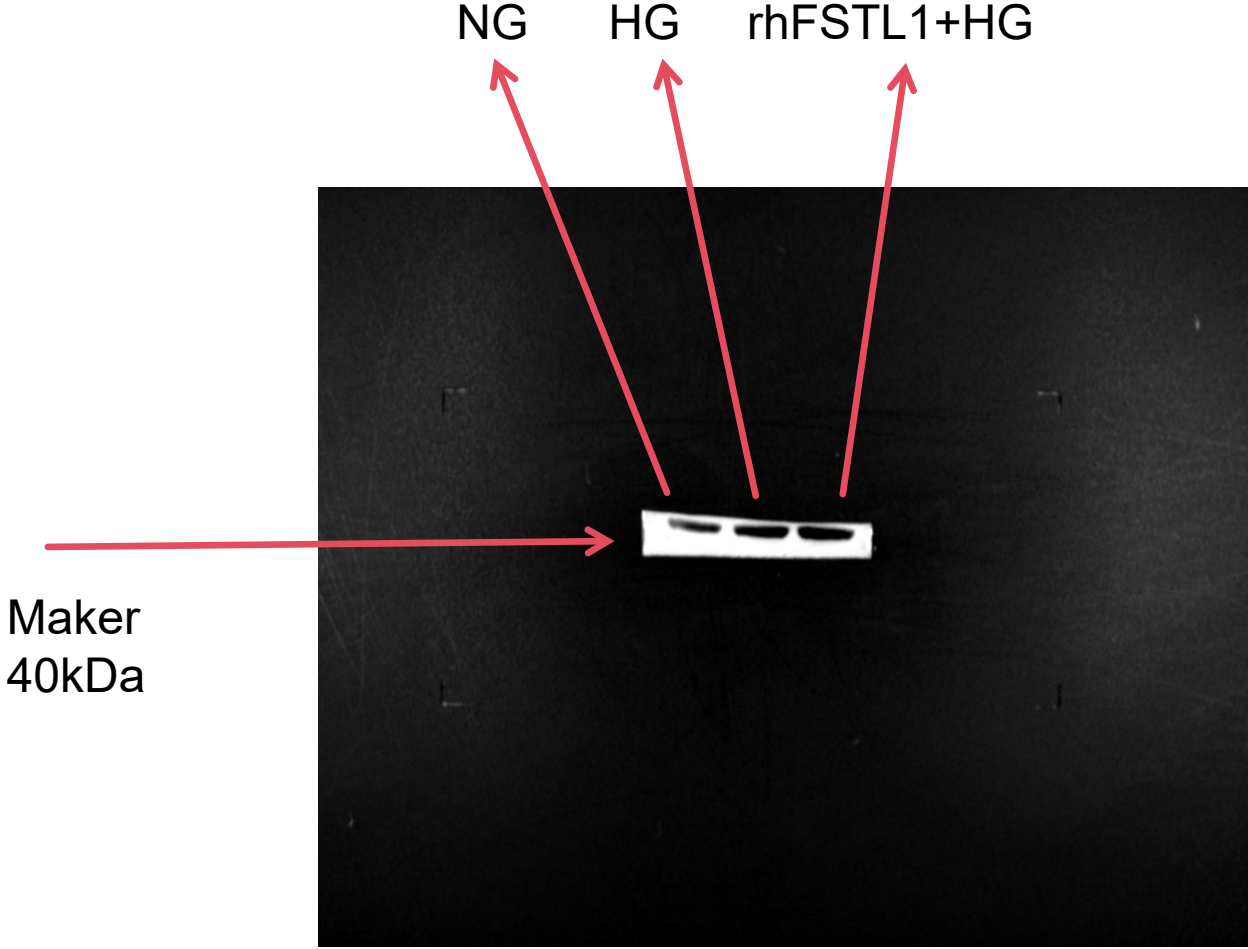



$\alpha$ -SMA-45kDa

2023-06-15

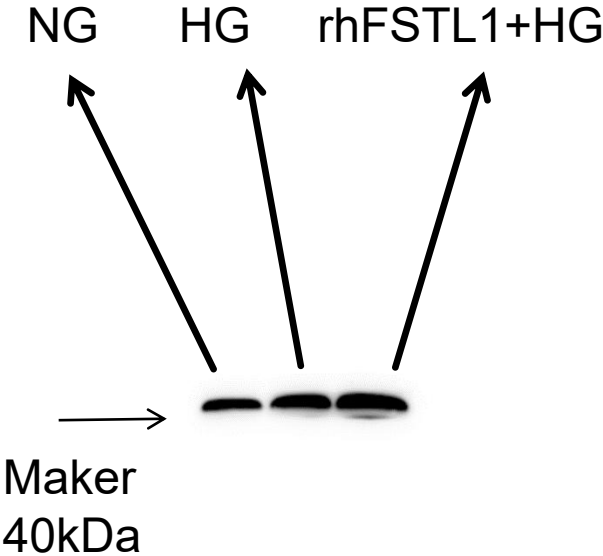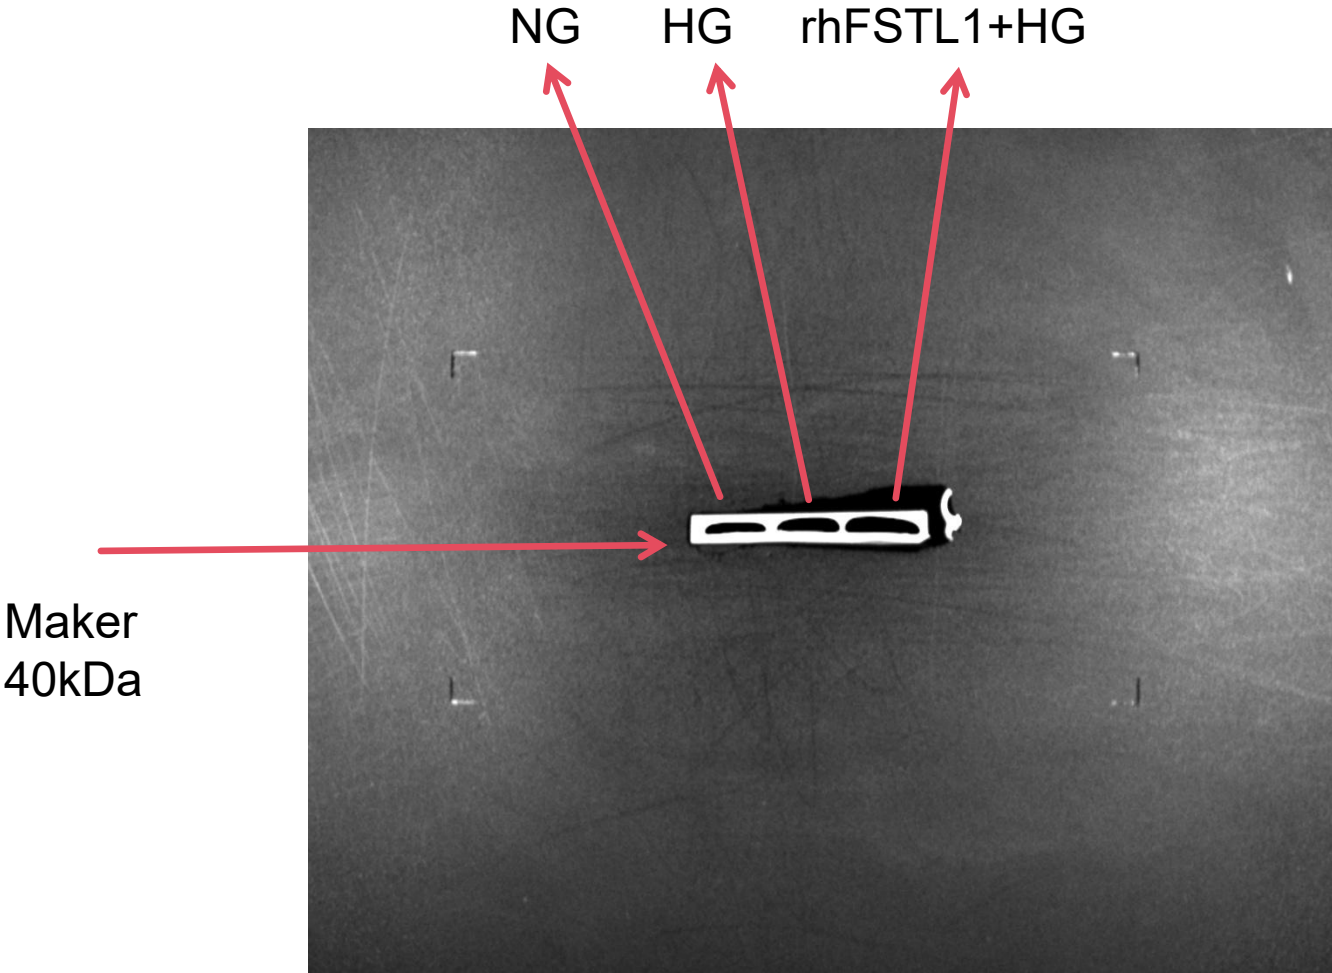

$\beta$ -actin

2023-09-01

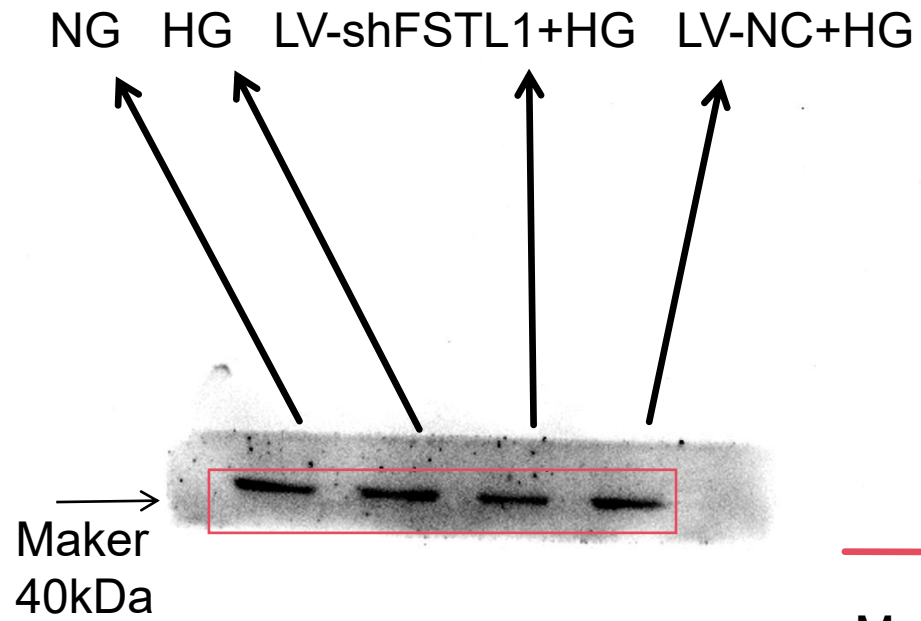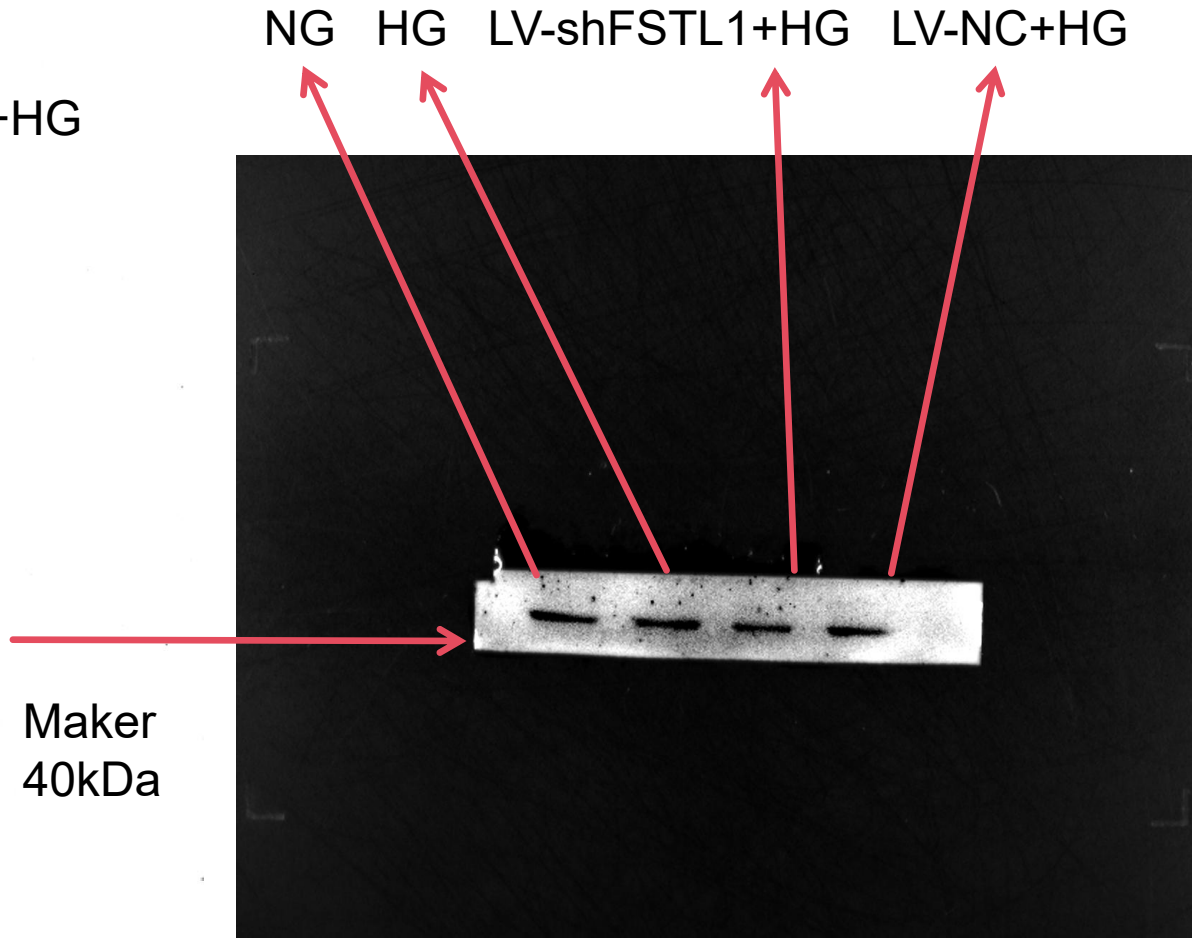

p-p65-65kDa

2023-09-07

NG HG LV-shFSTL1+HG LV-NC+HG

→  
Maker  
70kDa

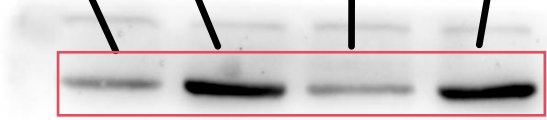

NG HG LV-shFSTL1+HG LV-NC+HG

→  
Maker  
70kDa

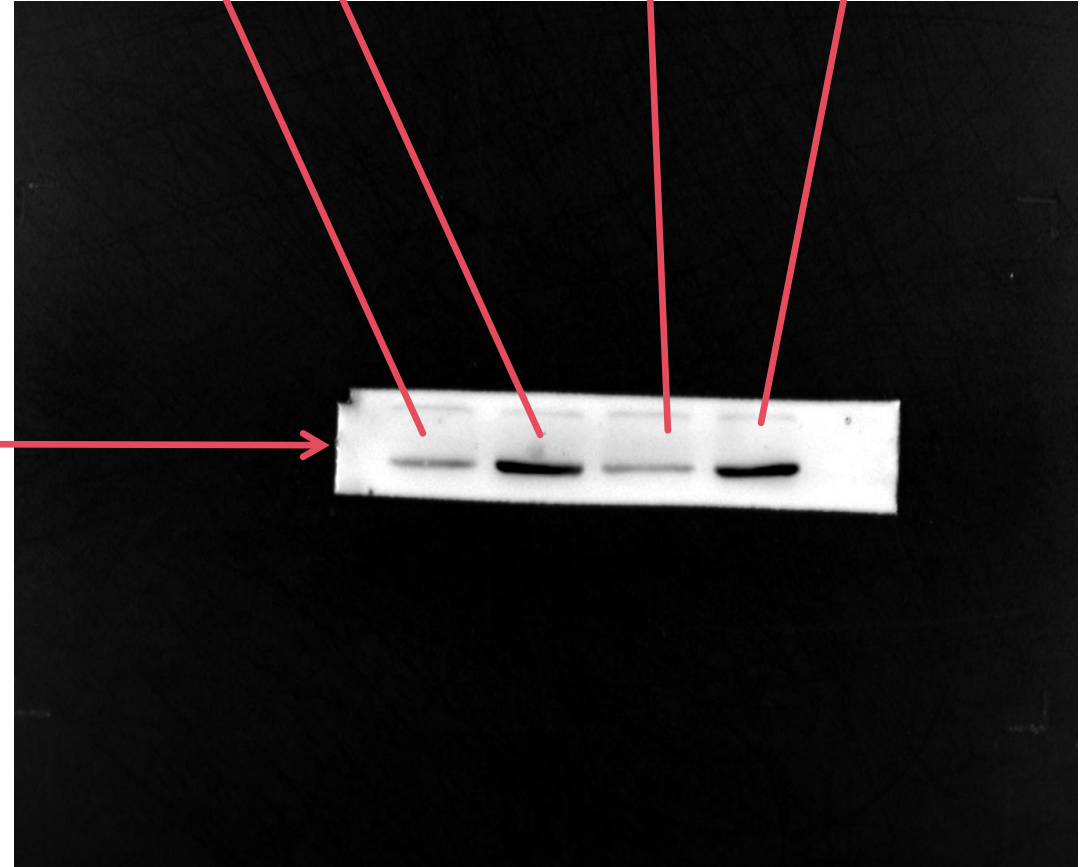

p-p65-65kDa

2023-09-15

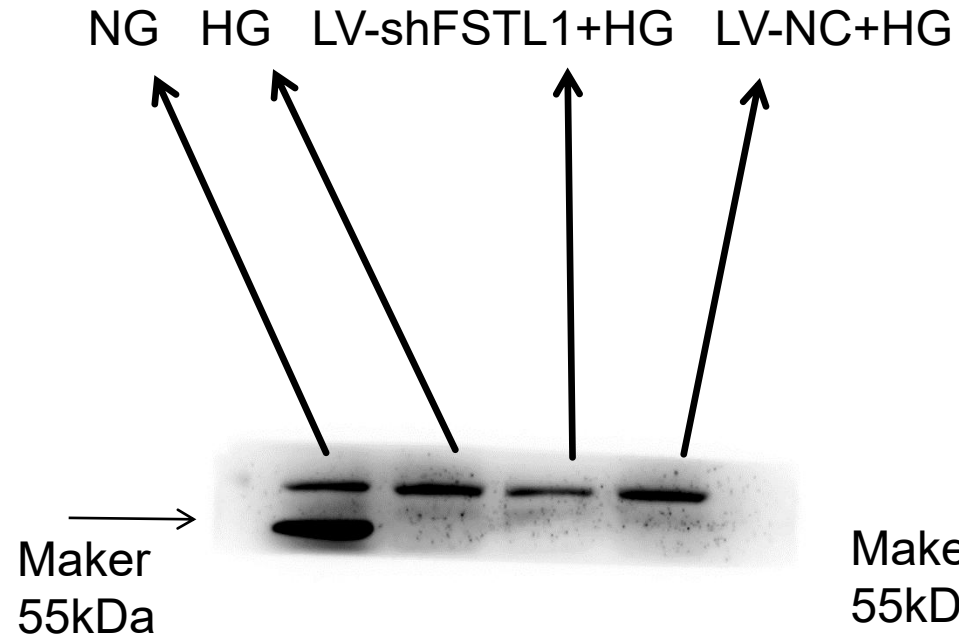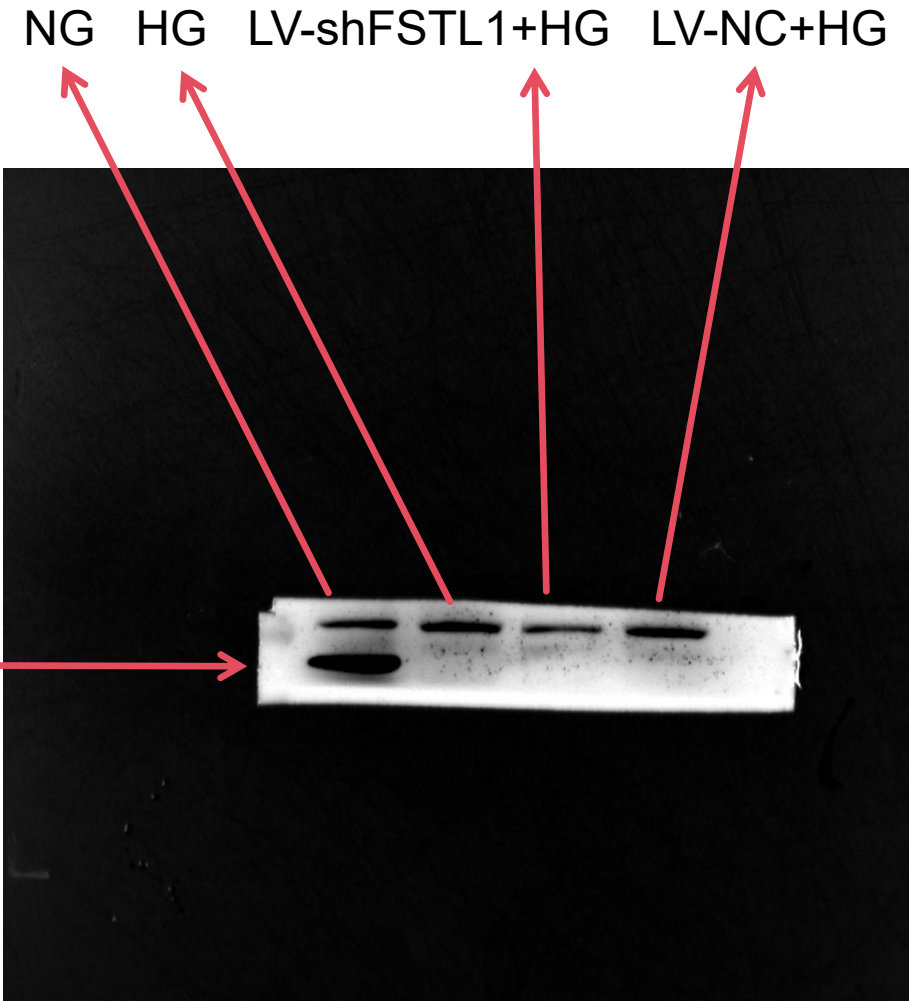

p-p65-65kDa

2023-09-28

NG HG LV-shFSTL1+HG LV-NC+HG

Maker  
55kDa

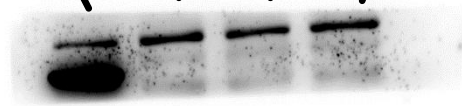

NG HG LV-shFSTL1+HG LV-NC+HG

Maker  
55kDa

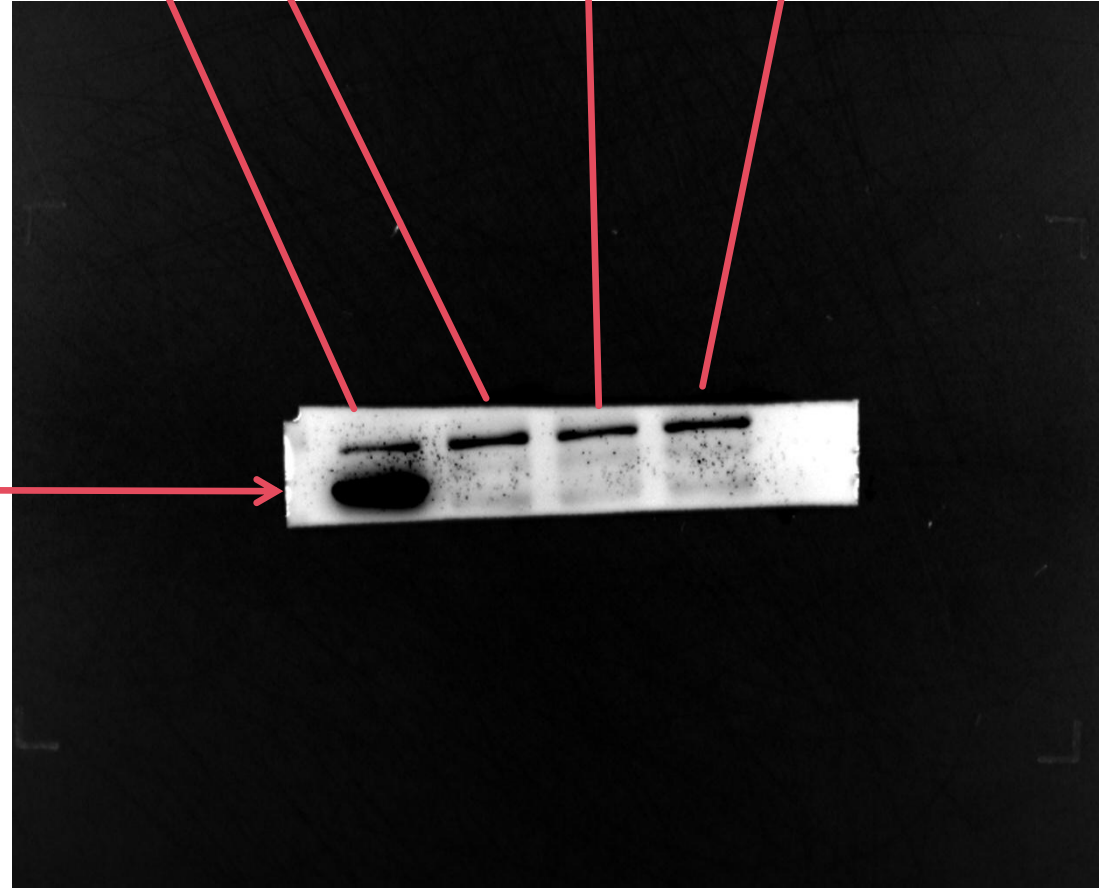

p65-65kDa

2023-09-06

NG HG LV-shFSTL1+HG LV-NC+HG

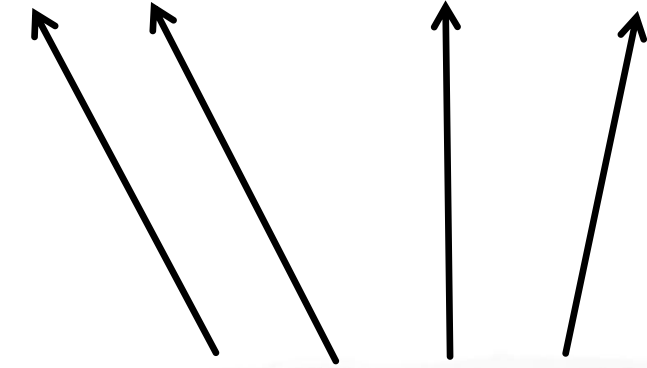

Maker  
70kDa

Maker  
70kDa

NG HG LV-shFSTL1+HG LV-NC+HG

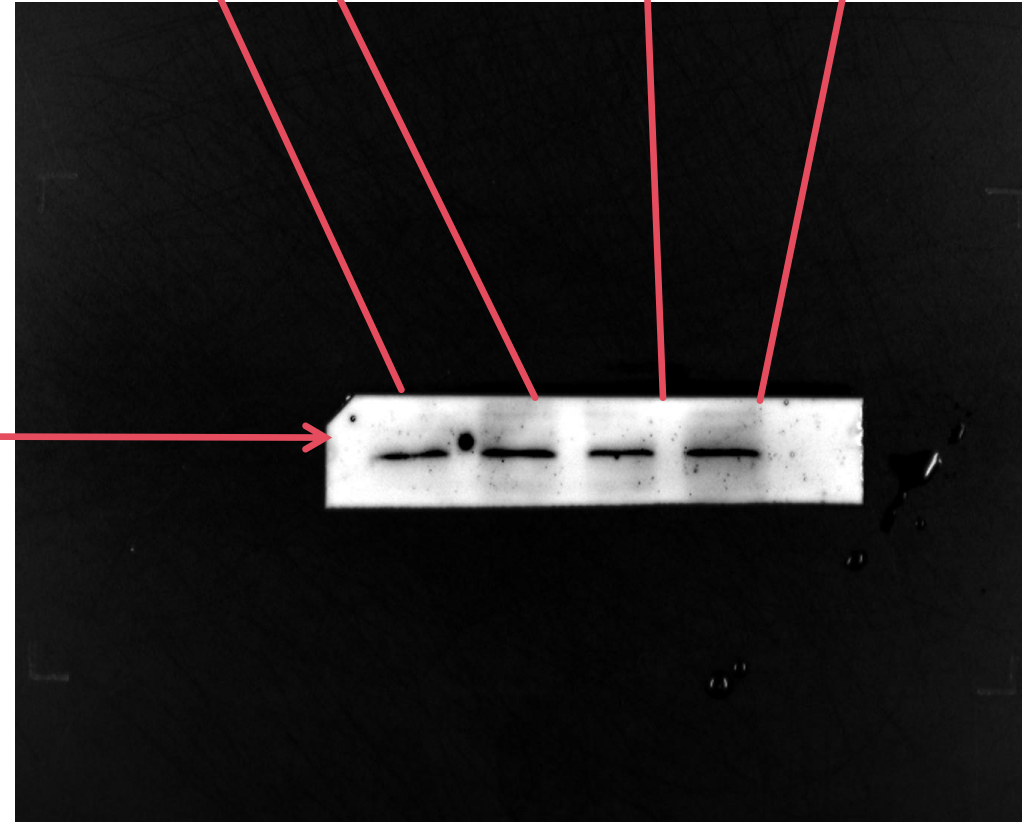

p65-65kDa

2023-09-16

NG HG LV-shFSTL1+HG LV-NC+HG

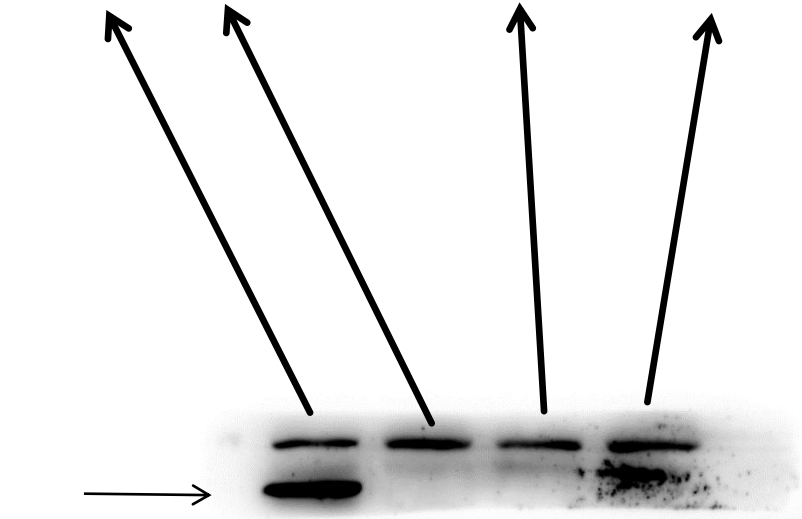

Maker  
55kDa

NG HG LV-shFSTL1+HG LV-NC+HG

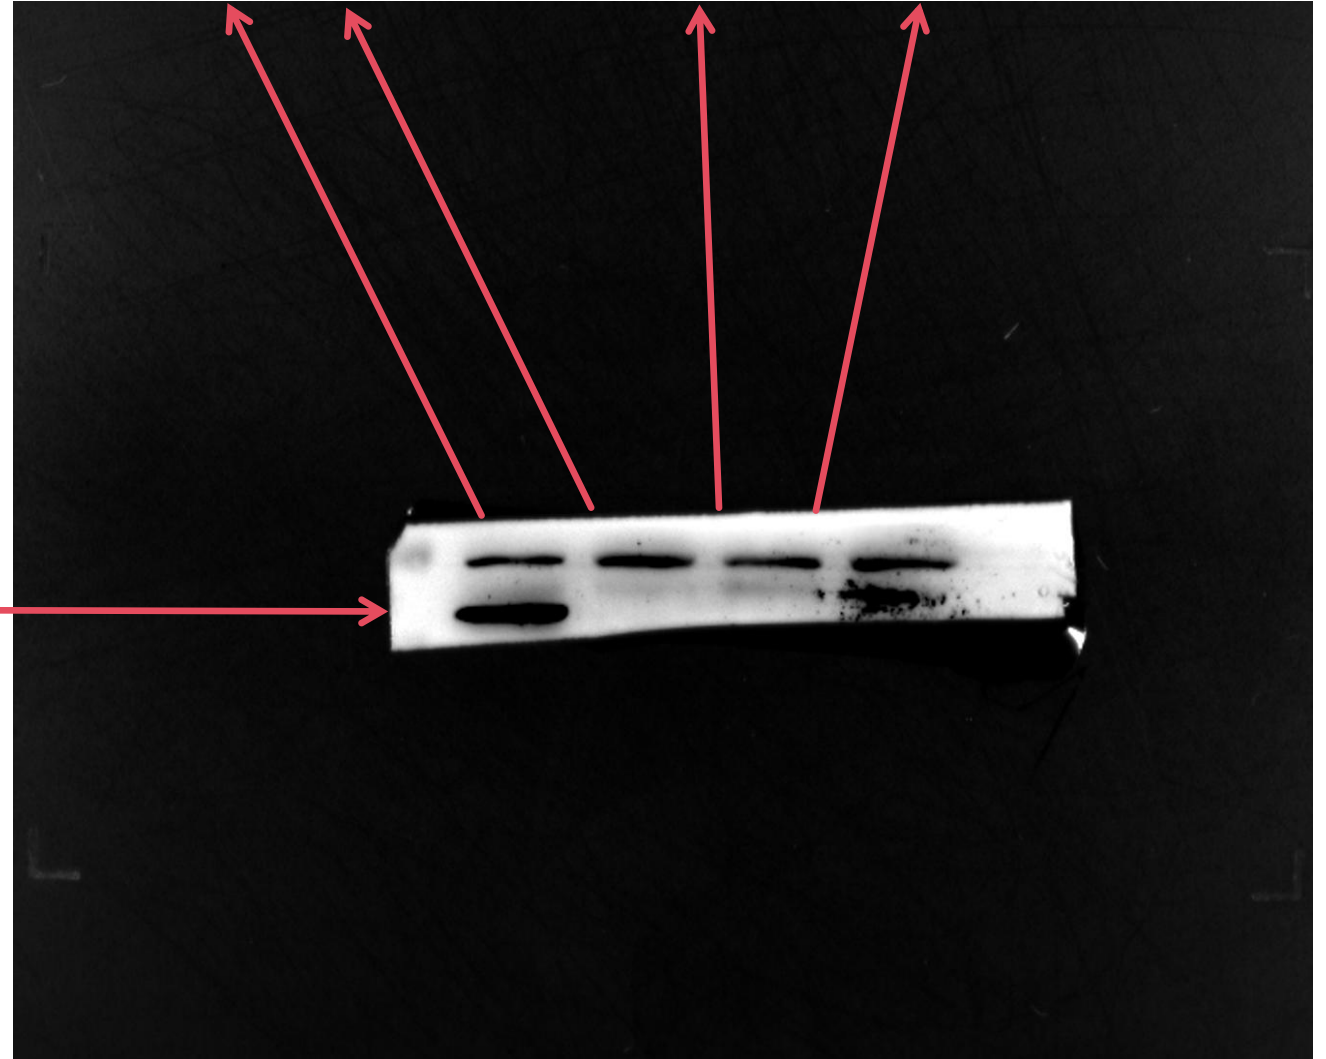

Maker  
55kDa

p65-65kDa

2023-09-29

NG HG LV-shFSTL1+HG LV-NC+HG

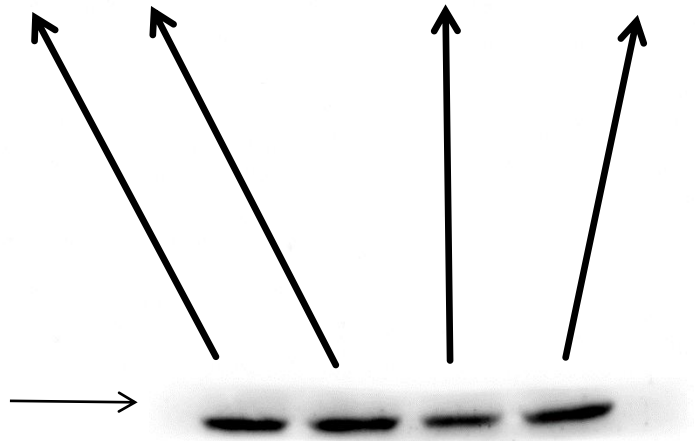

Maker  
70kDa

NG HG LV-shFSTL1+HG LV-NC+HG

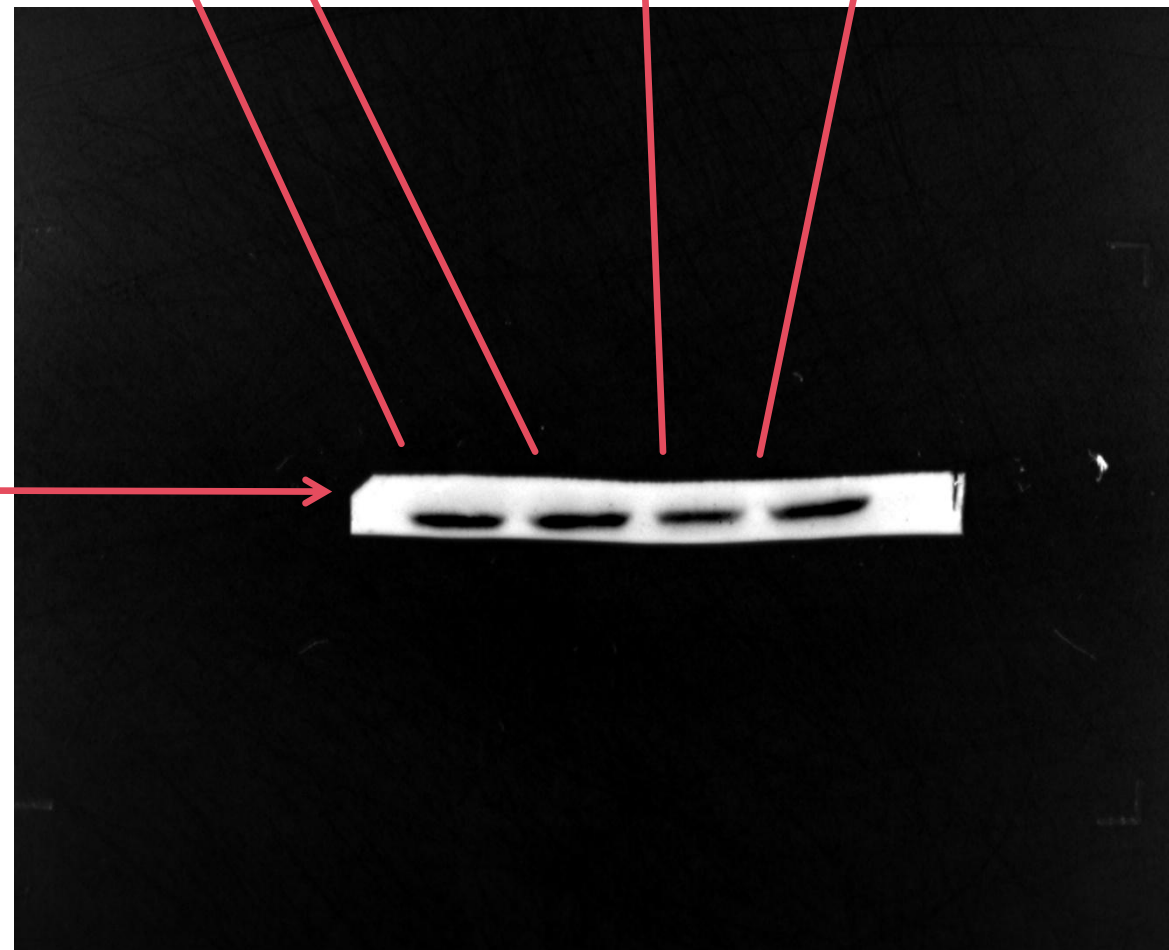

Maker  
70kDa



$\beta$ -actin

2023-09-08

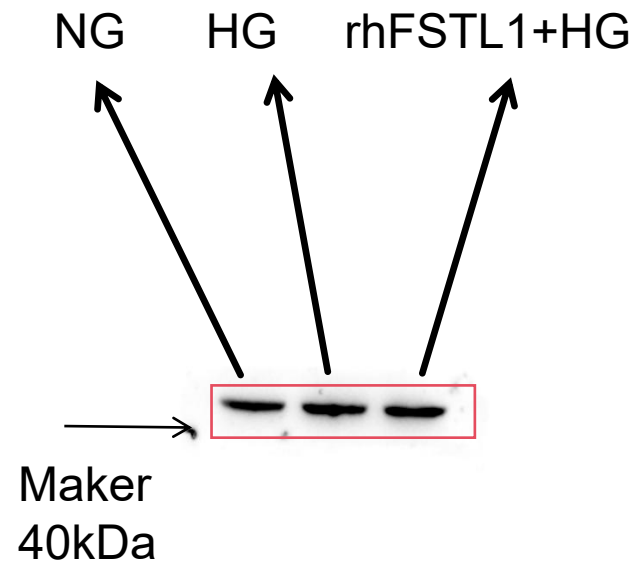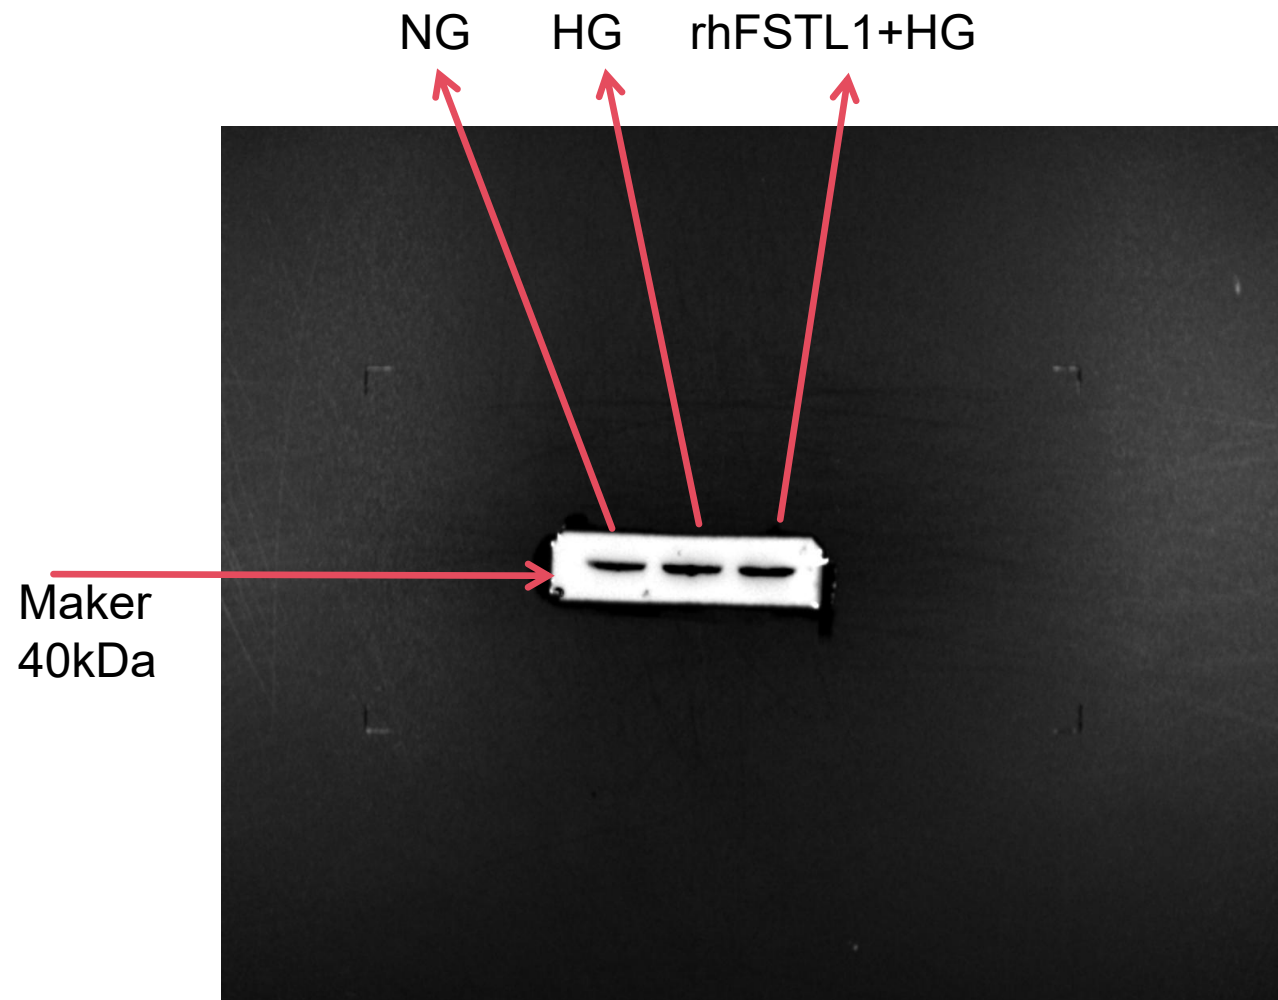

p-p65-65kDa

2023-09-12

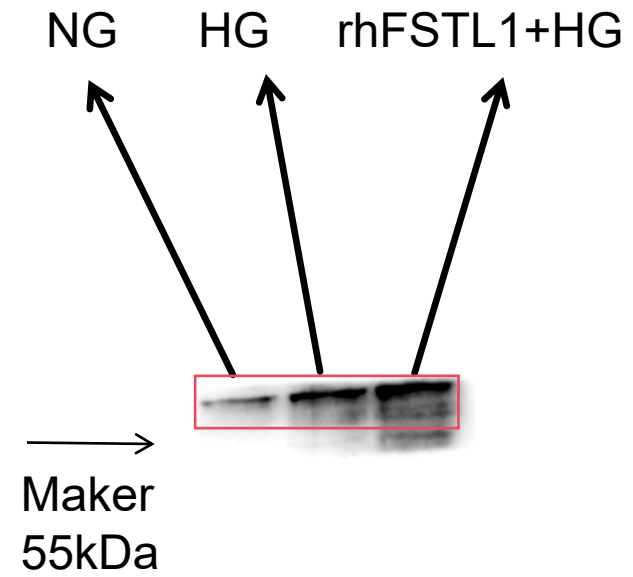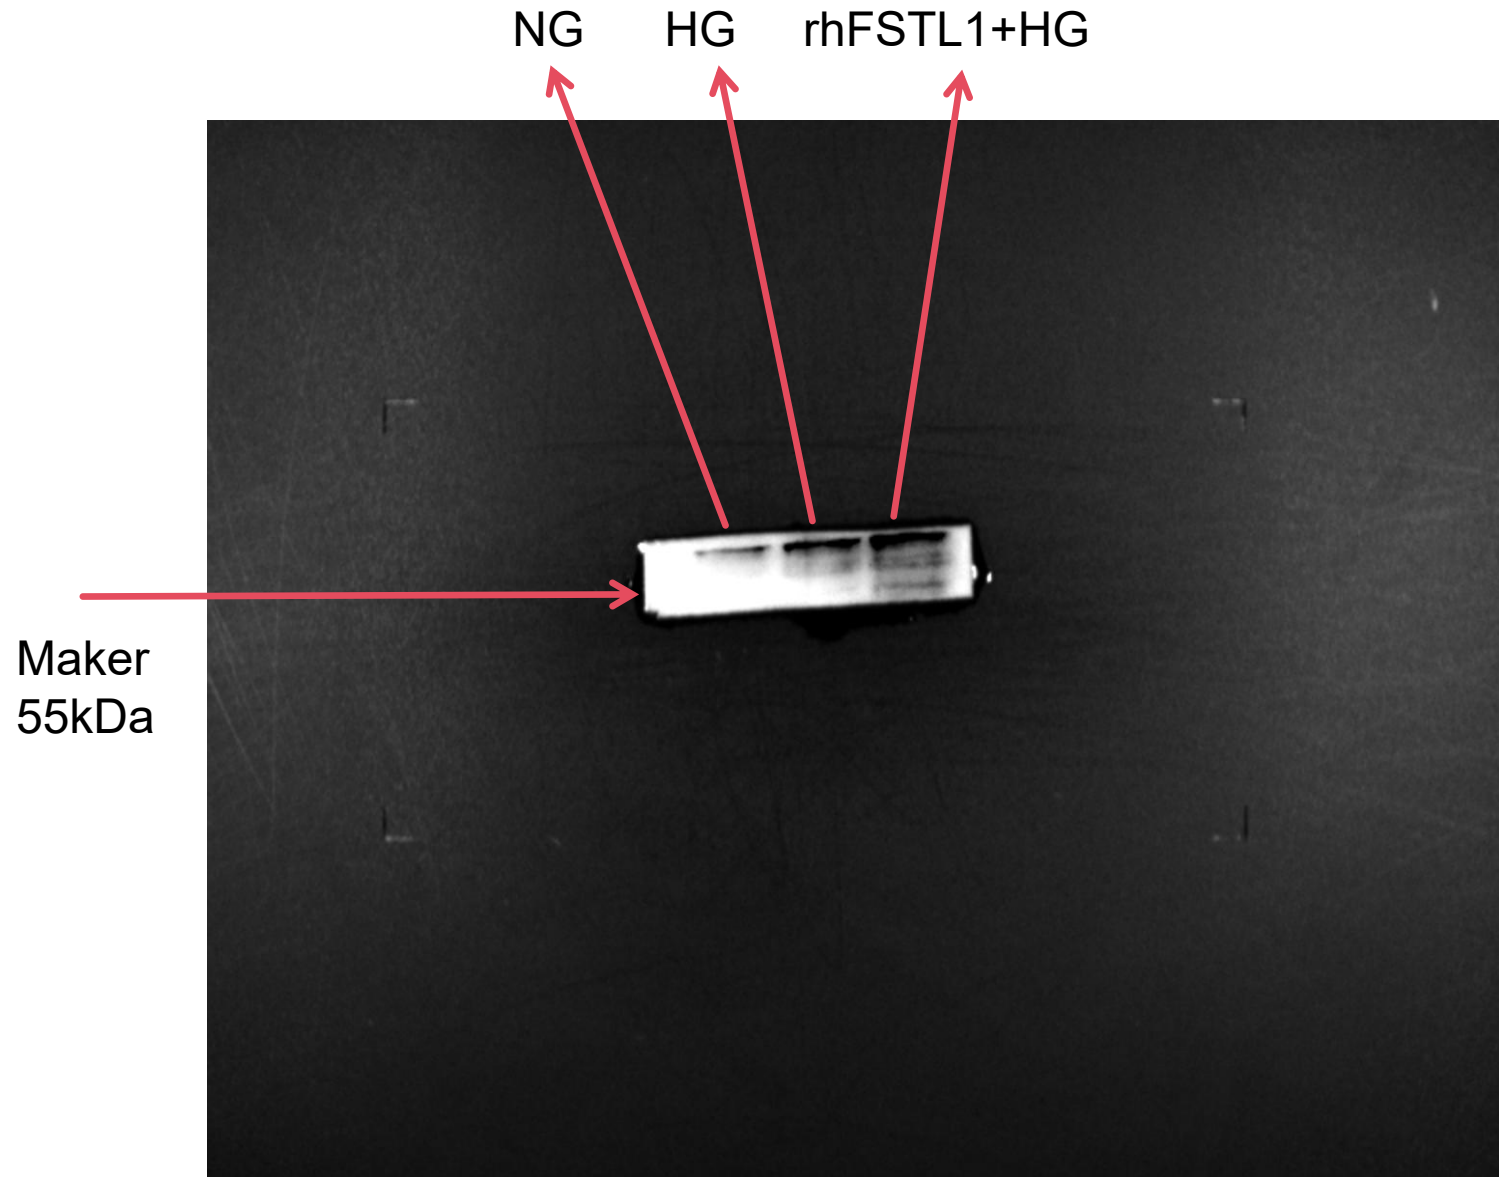

p-p65-65kDa

2023-09-17

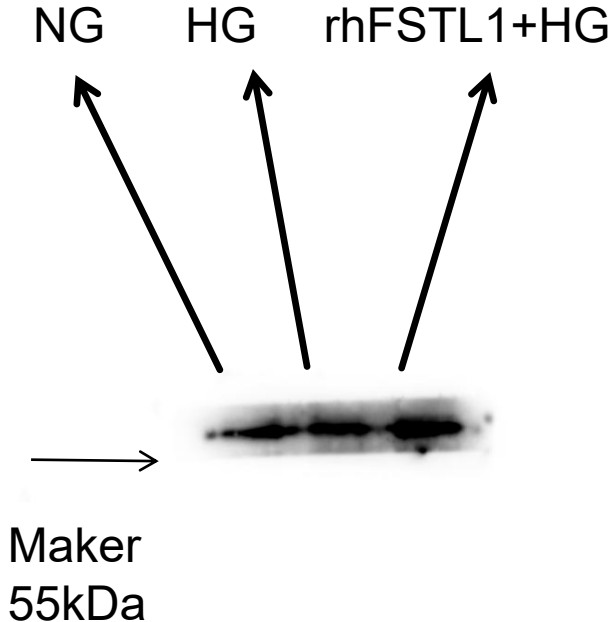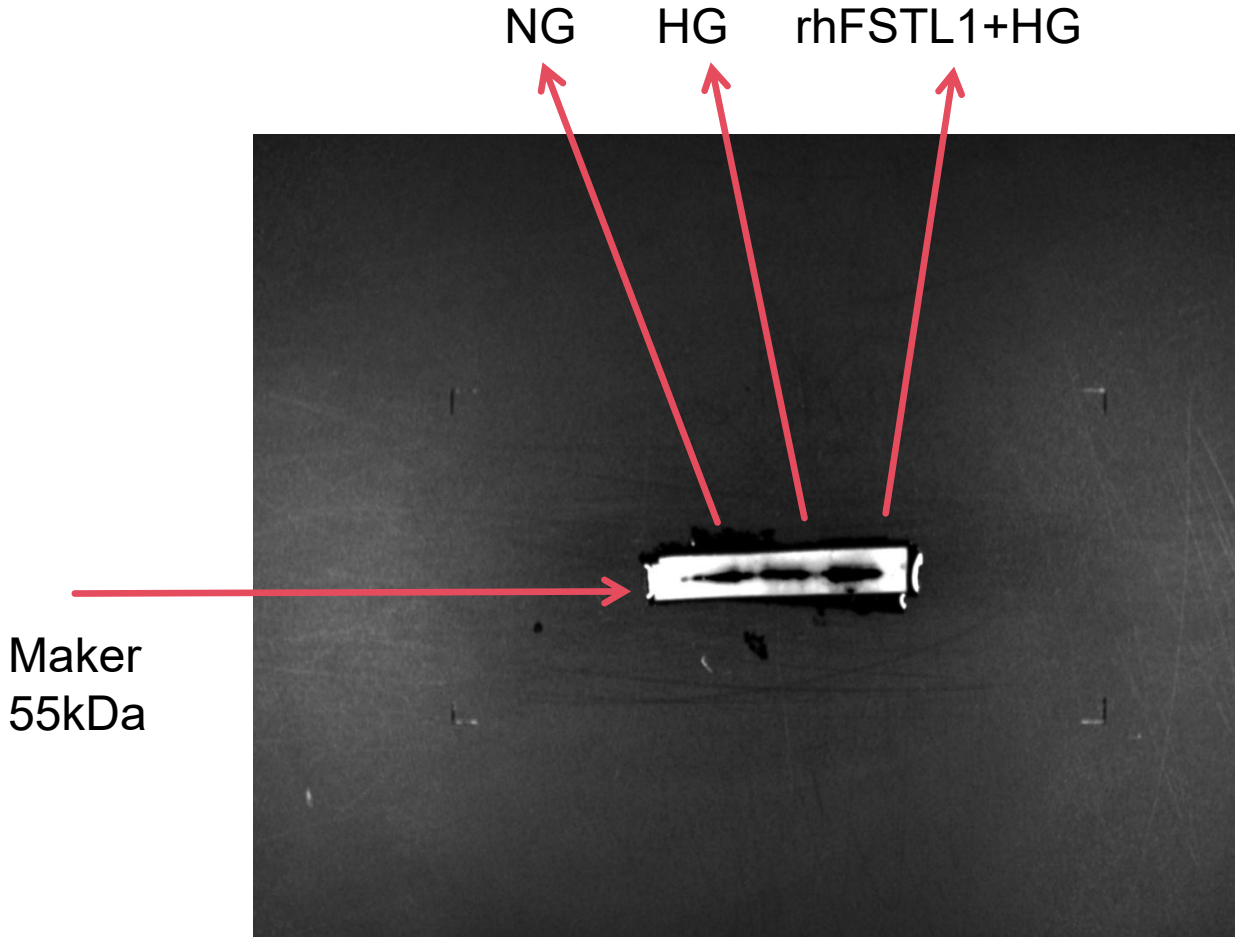

p-p65-65kDa

2023-09-21

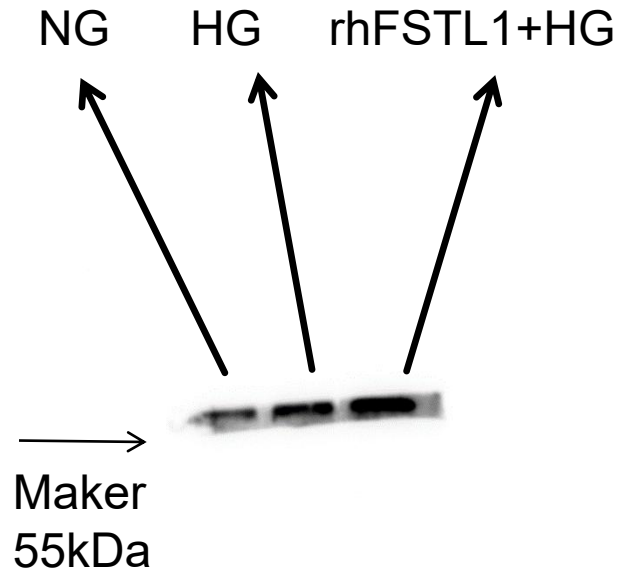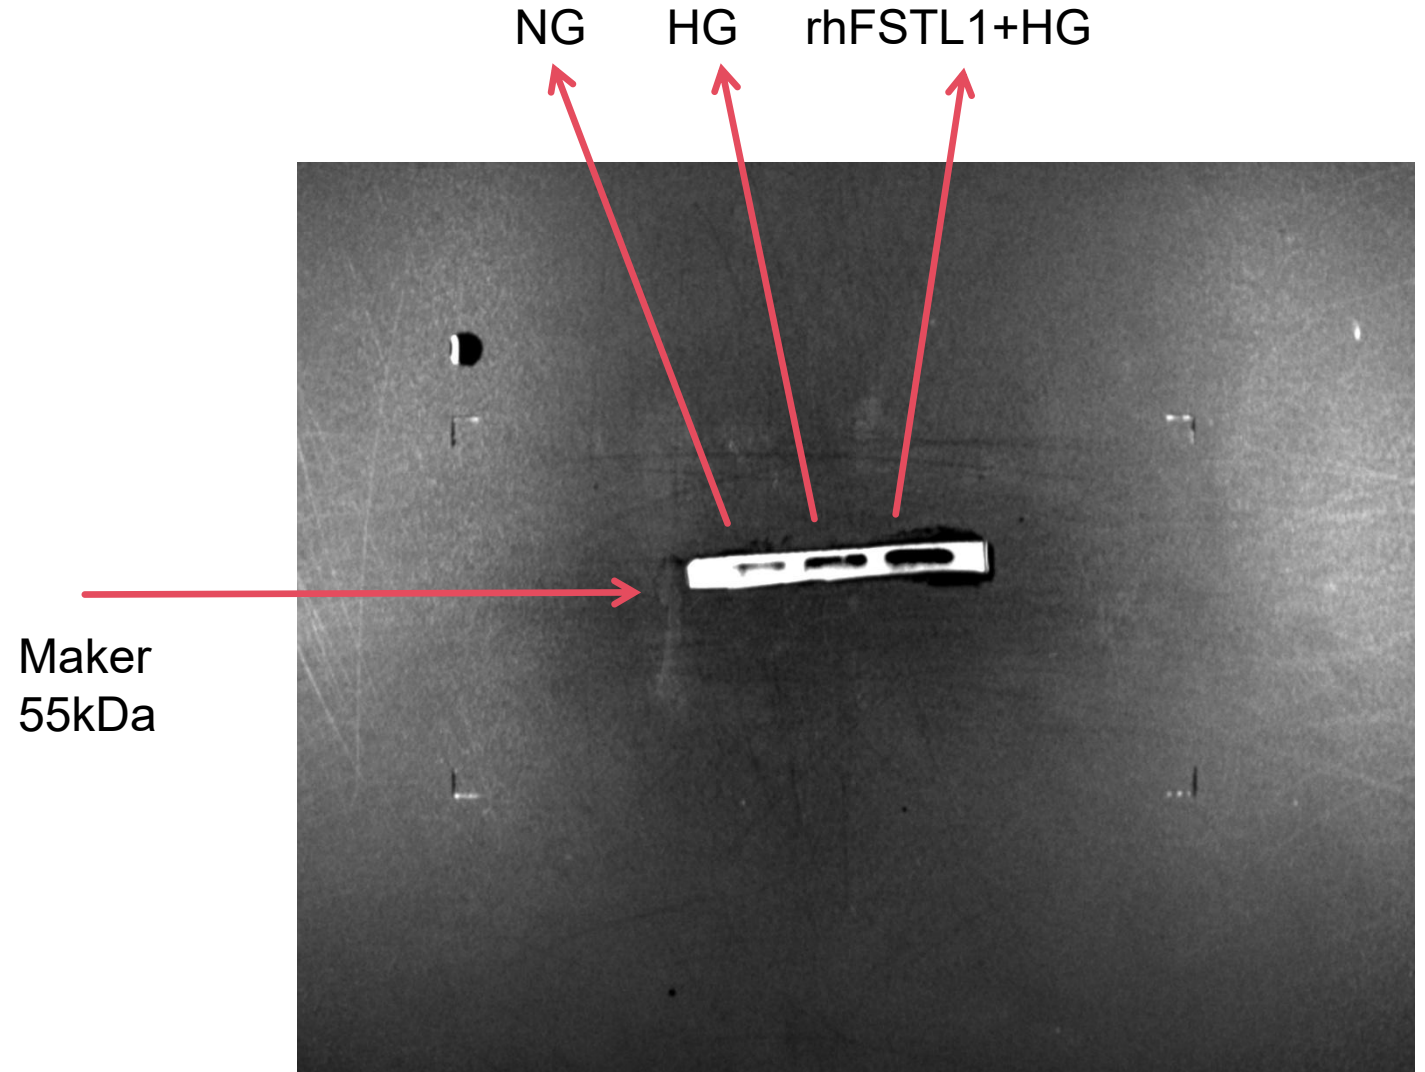

p65-65kDa

2023-09-10

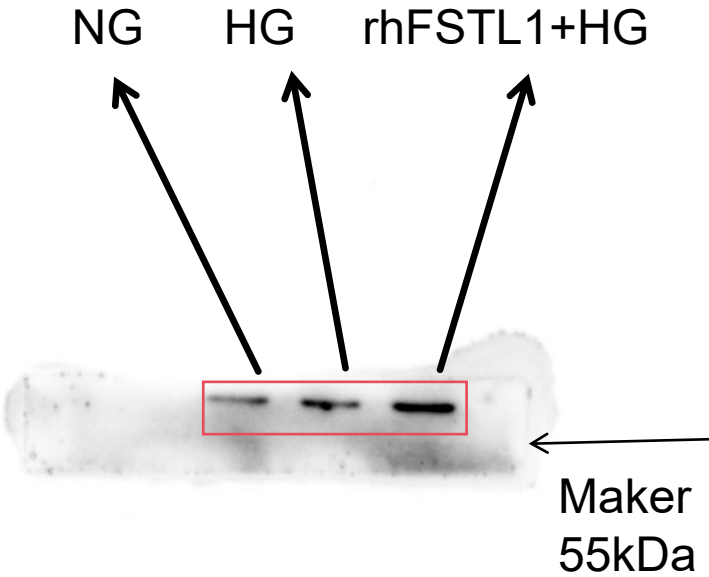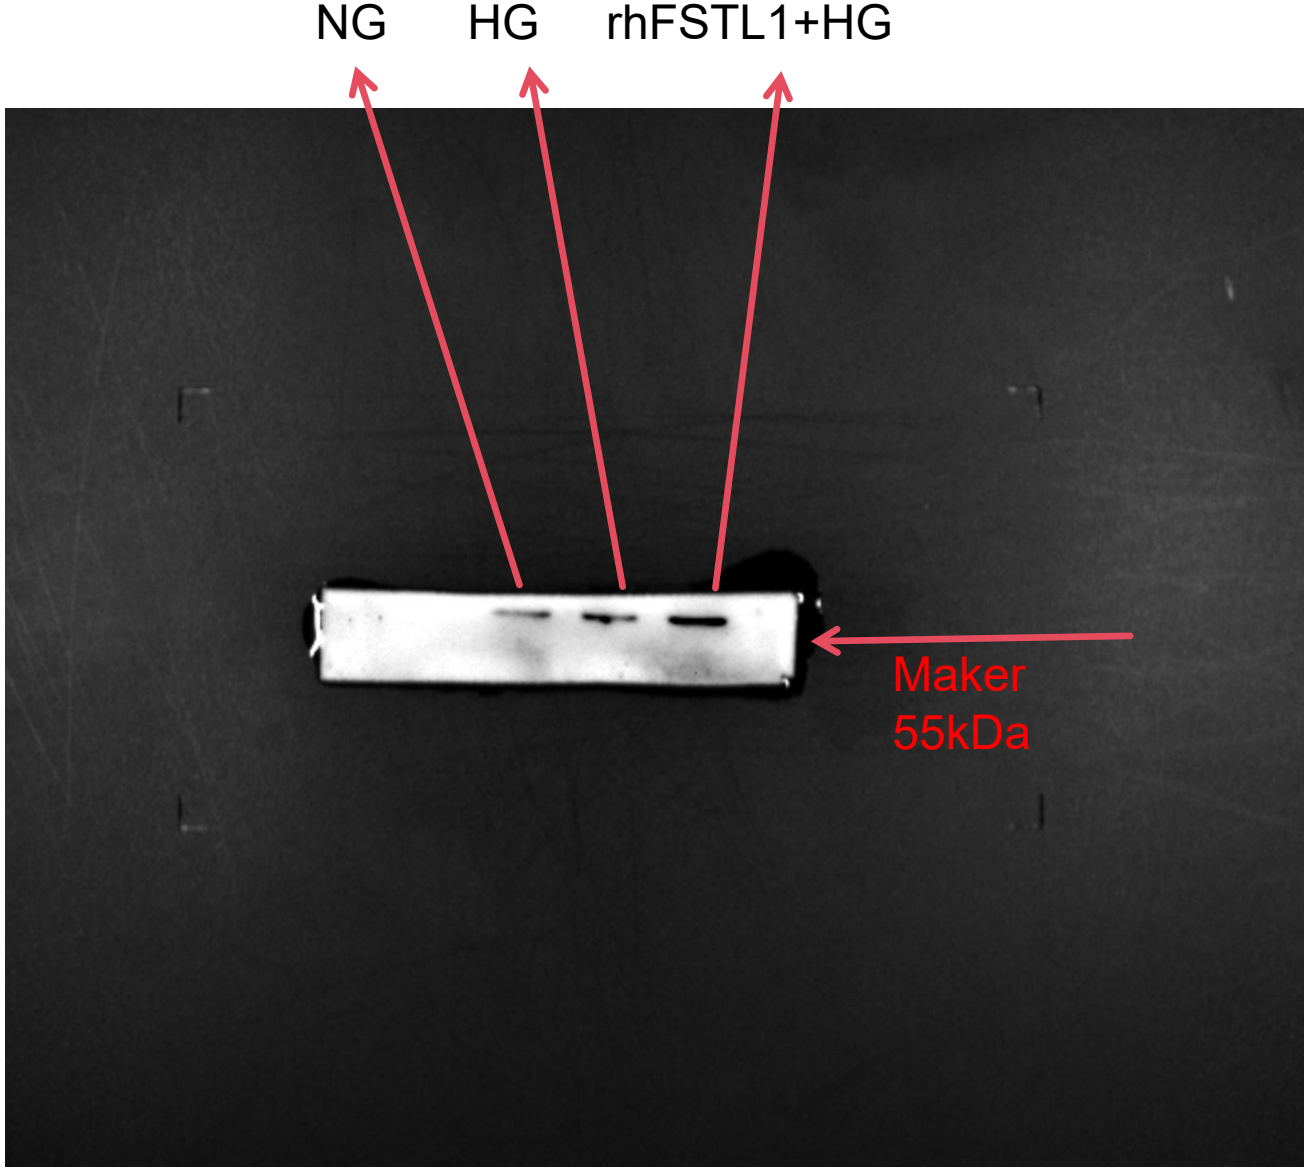

p65-65kDa

2023-09-18

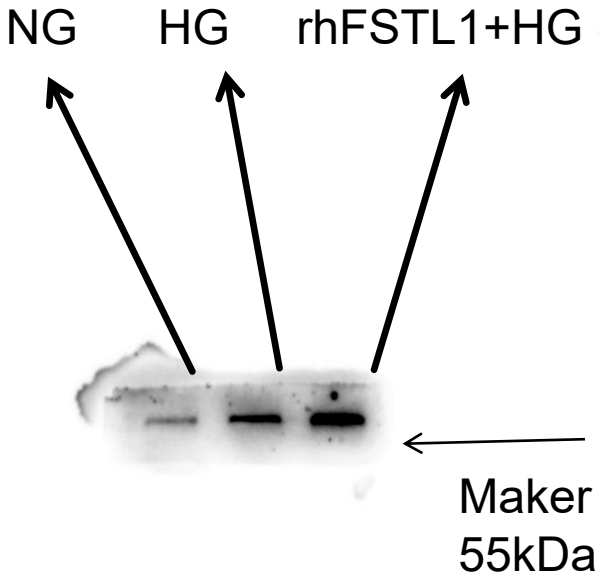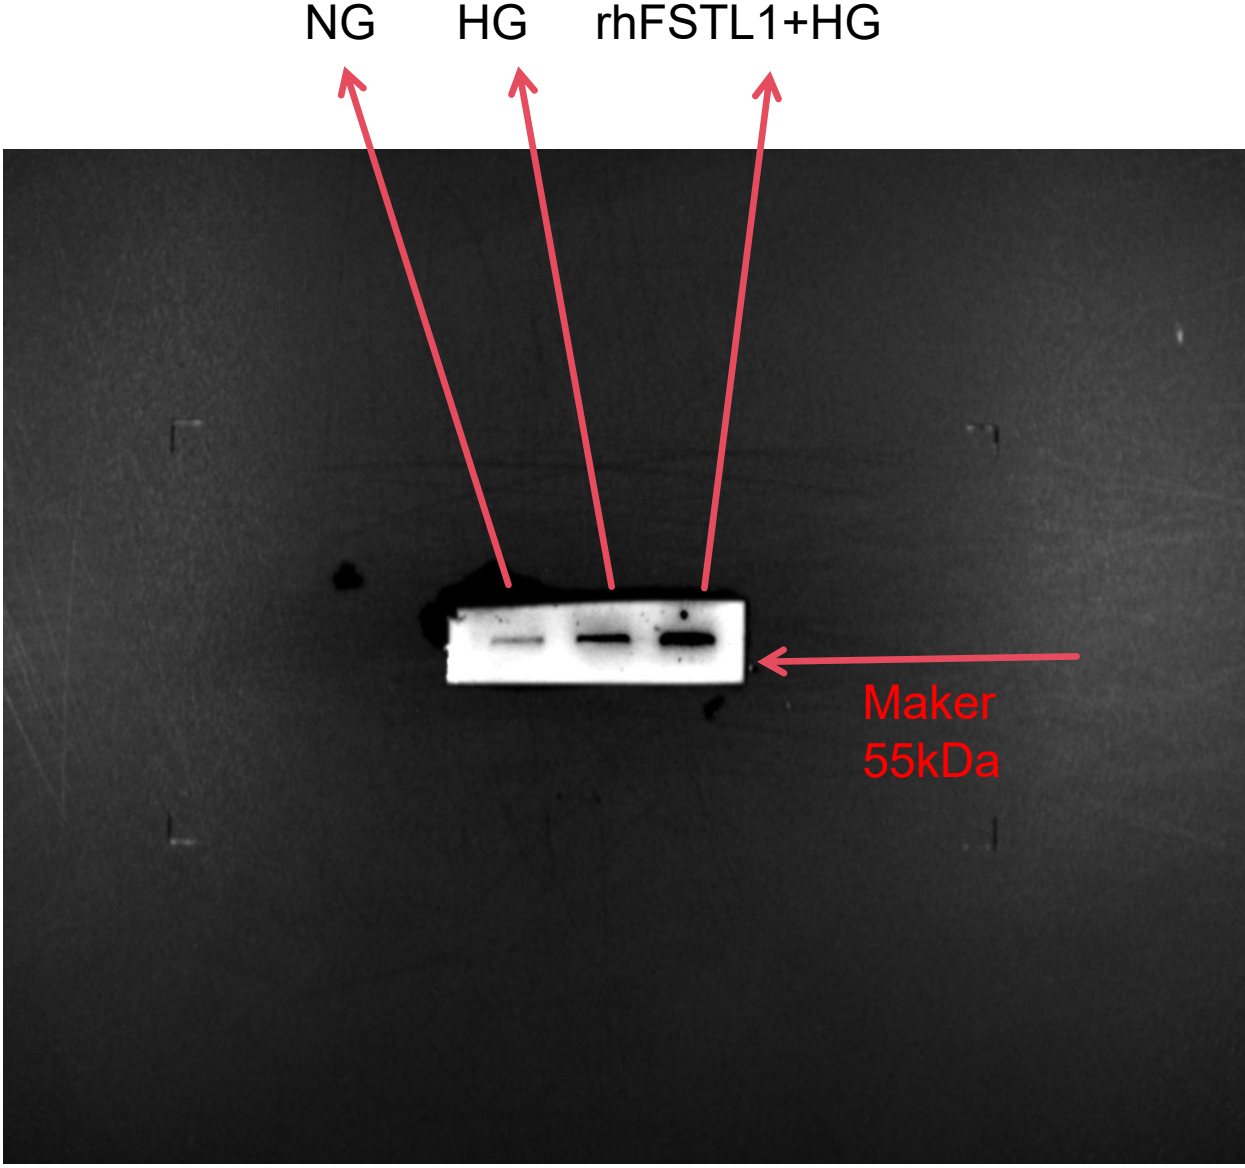

p65-65kDa

2023-09-27

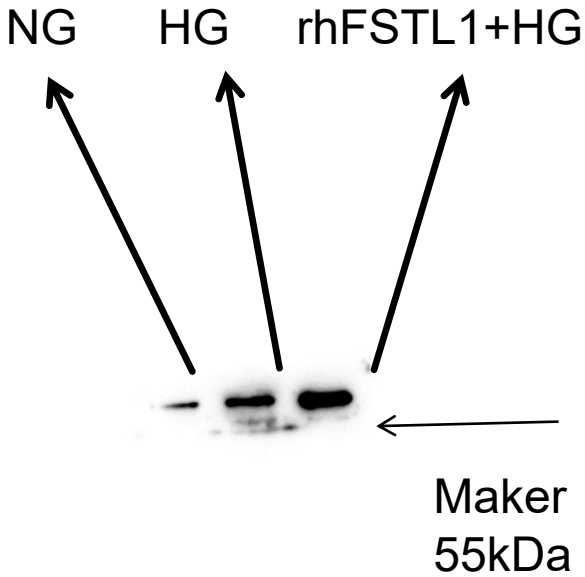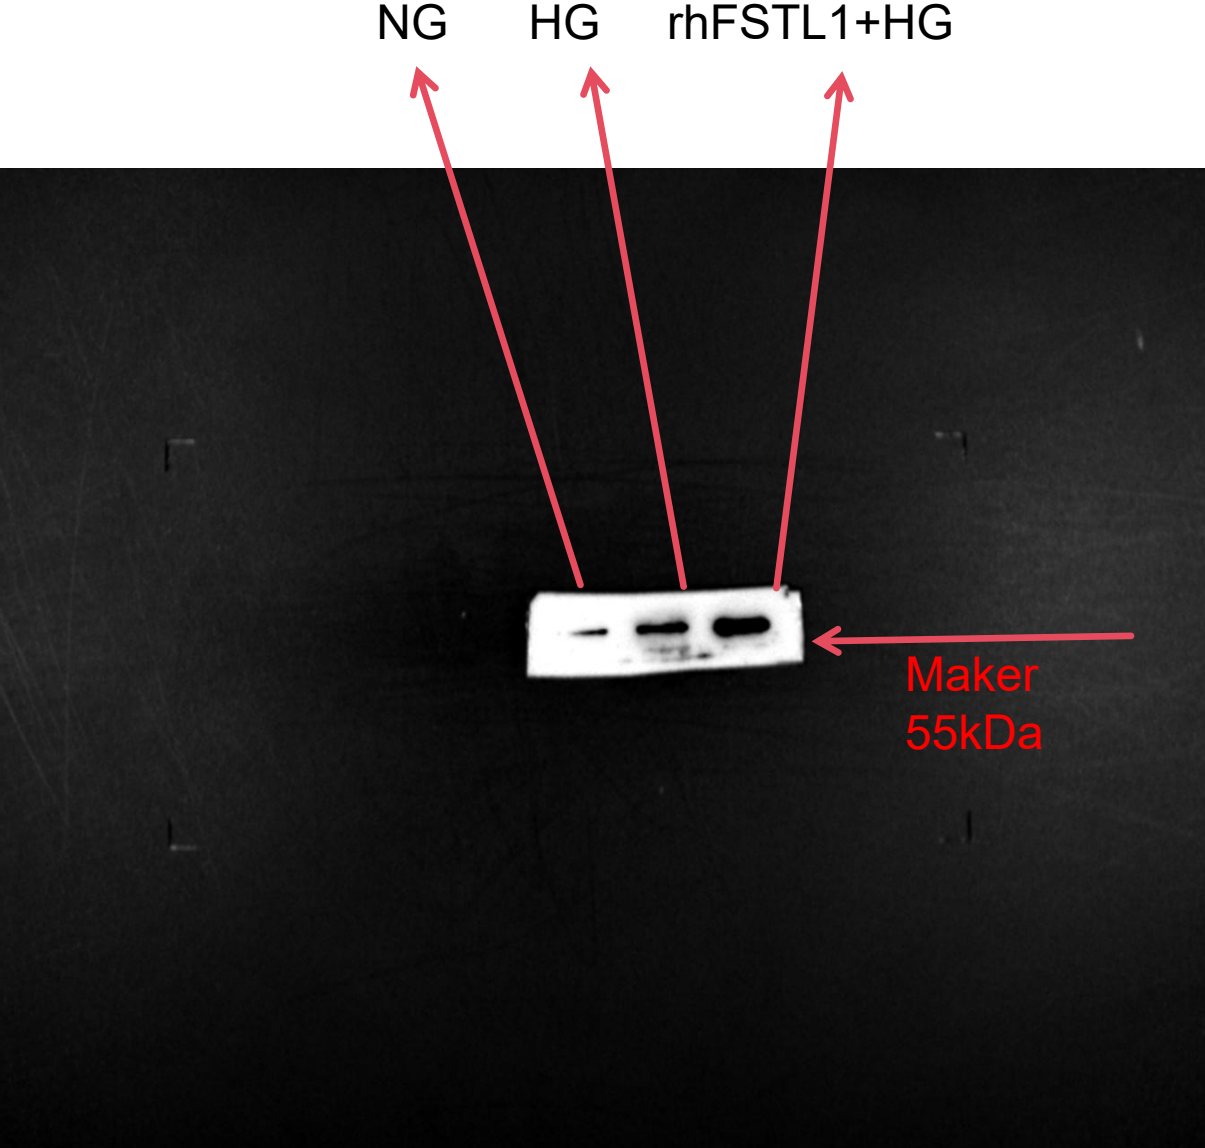

$\beta$ -actin

2023-11-02

LV-shFSTL1+HG    LV-shFSTL1+HG+PDTC

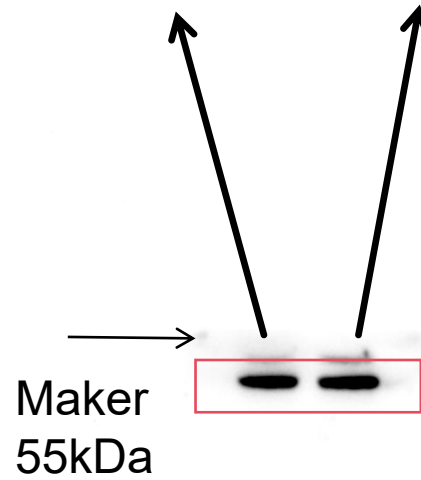

LV-shFSTL1+HG    LV-shFSTL1+HG+PDTC

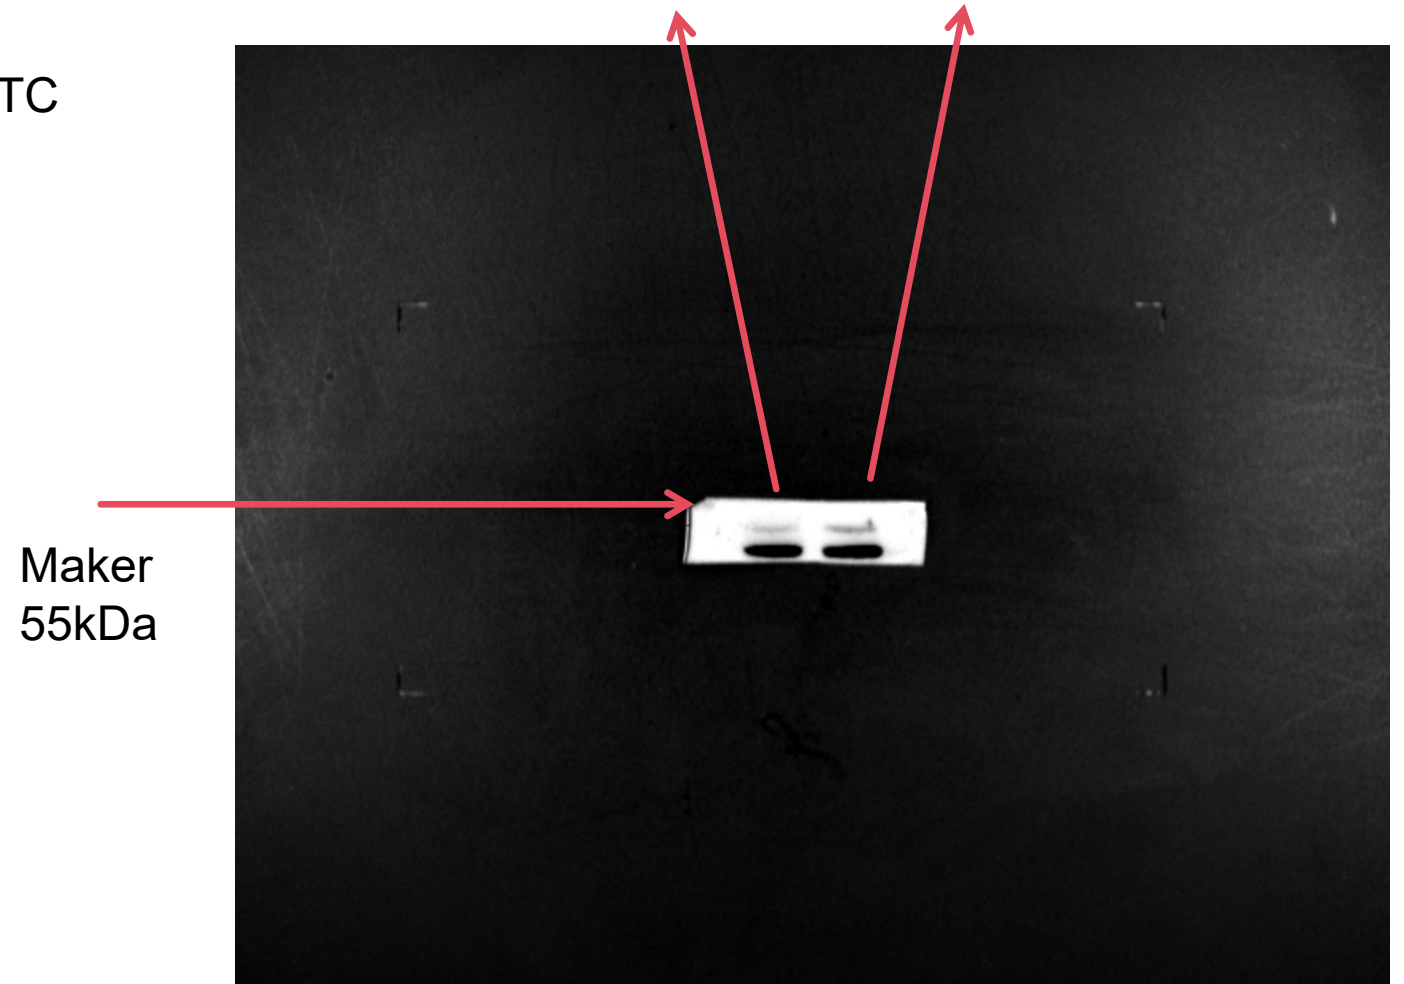



$\beta$ -actin

2023-11-09

LV-shFSTL1+HG      LV-shFSTL1+HG+PDTC

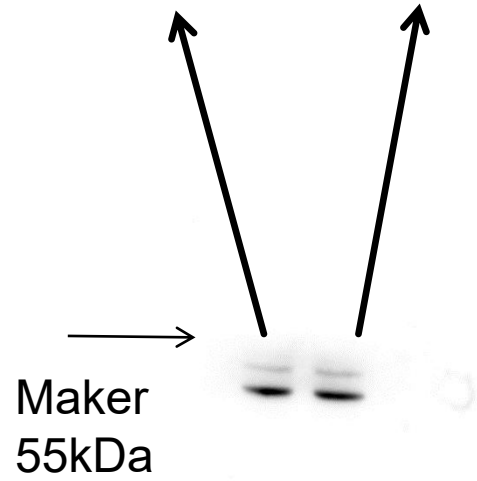

LV-shFSTL1+HG      LV-shFSTL1+HG+PDTC

Maker  
55kDa

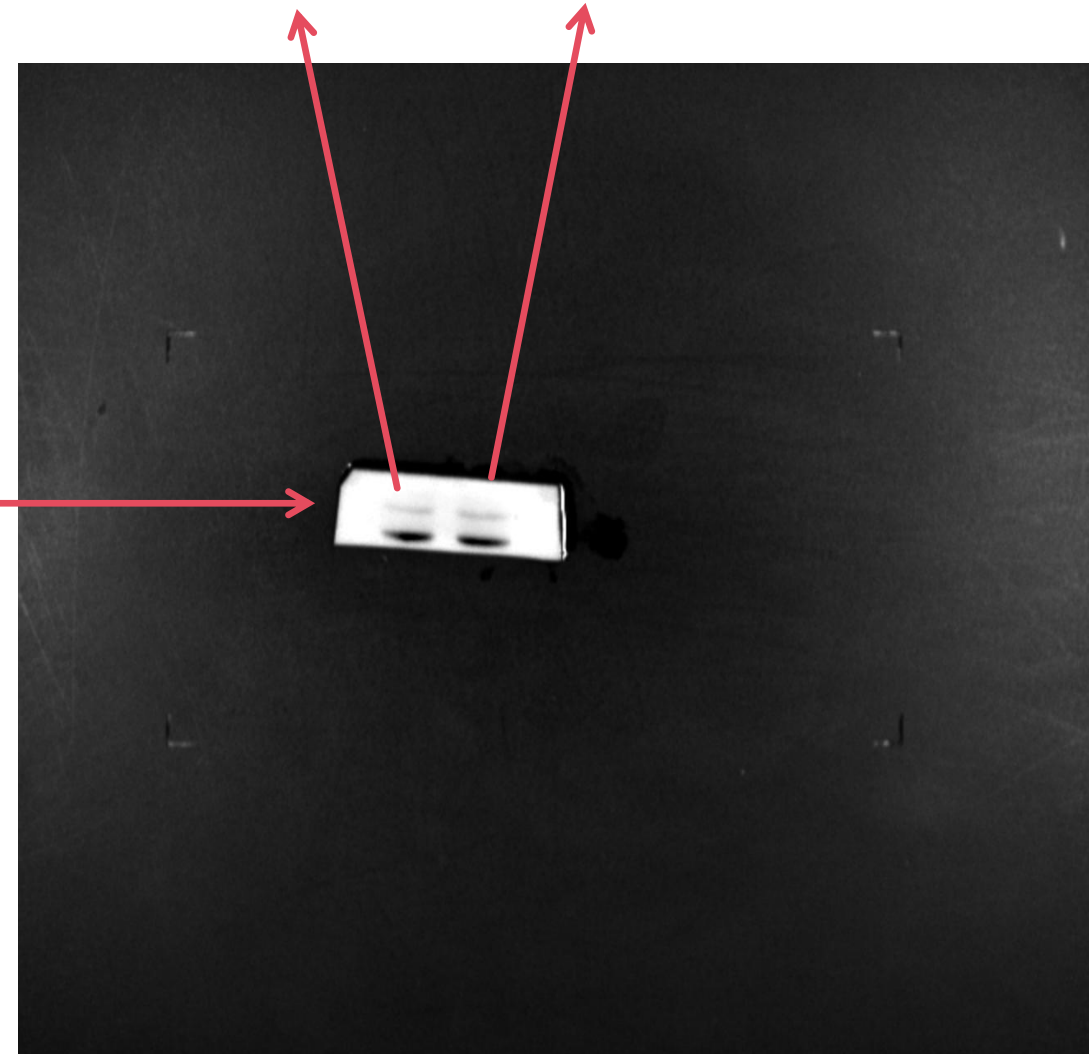

$\beta$ -actin

2023-11-18

LV-shFSTL1+HG      LV-shFSTL1+HG+PDTC

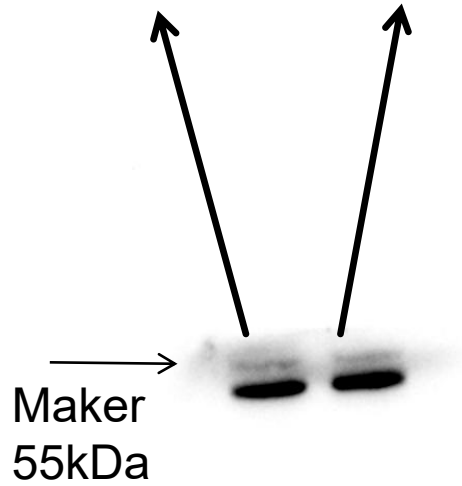

LV-shFSTL1+HG      LV-shFSTL1+HG+PDTC

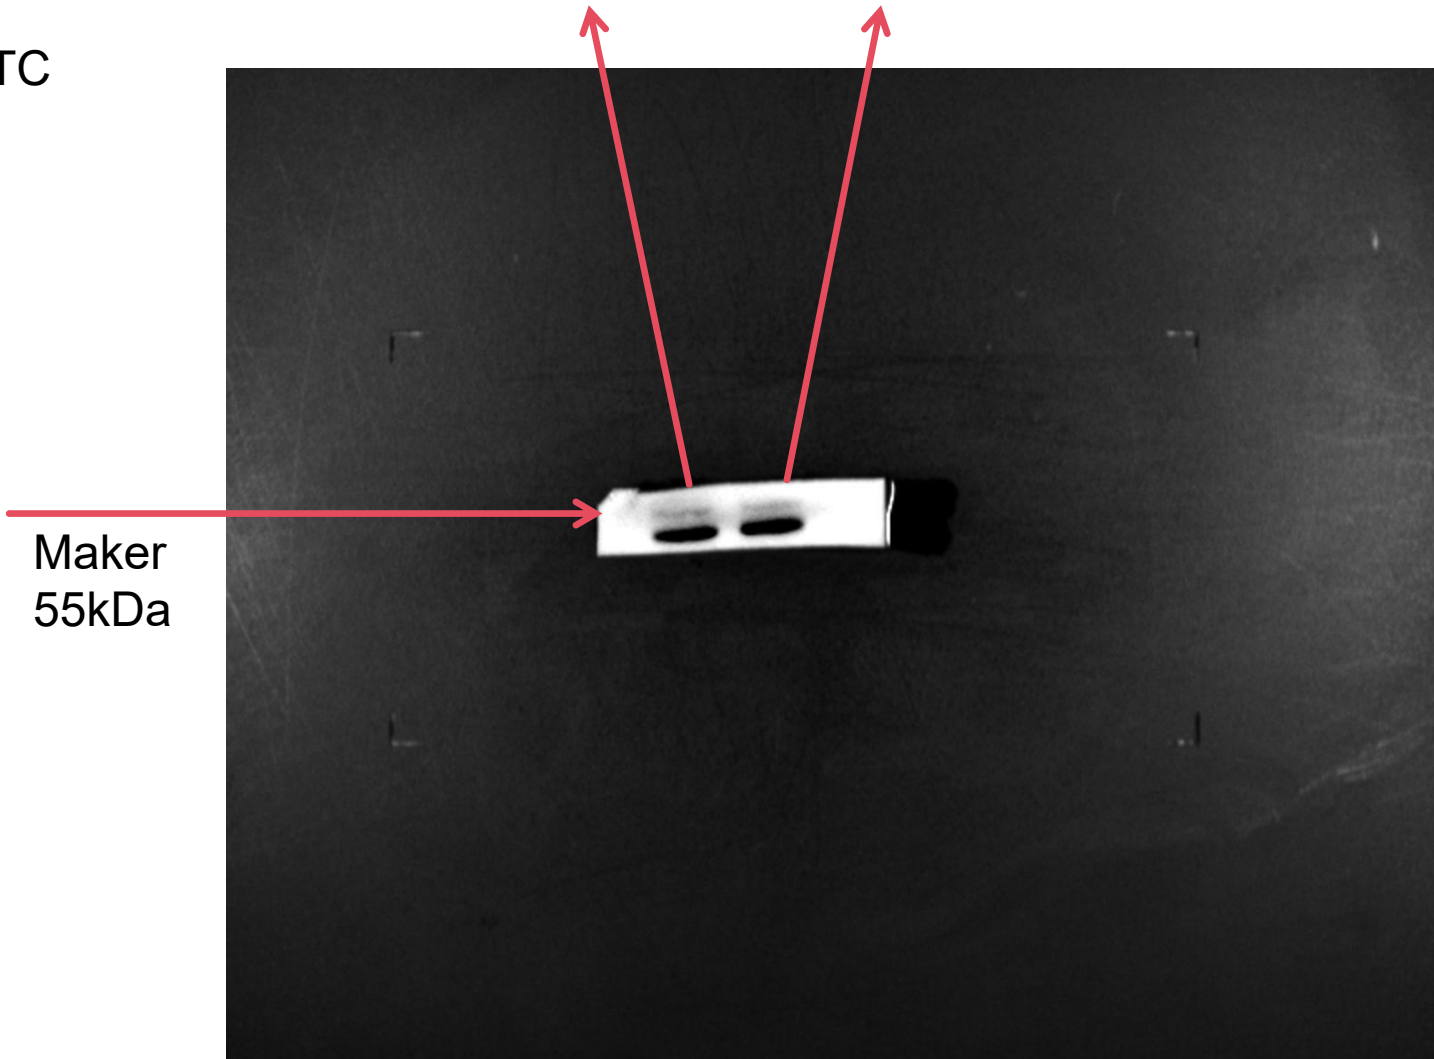

E-cadherin-120kDa

2023-11-04

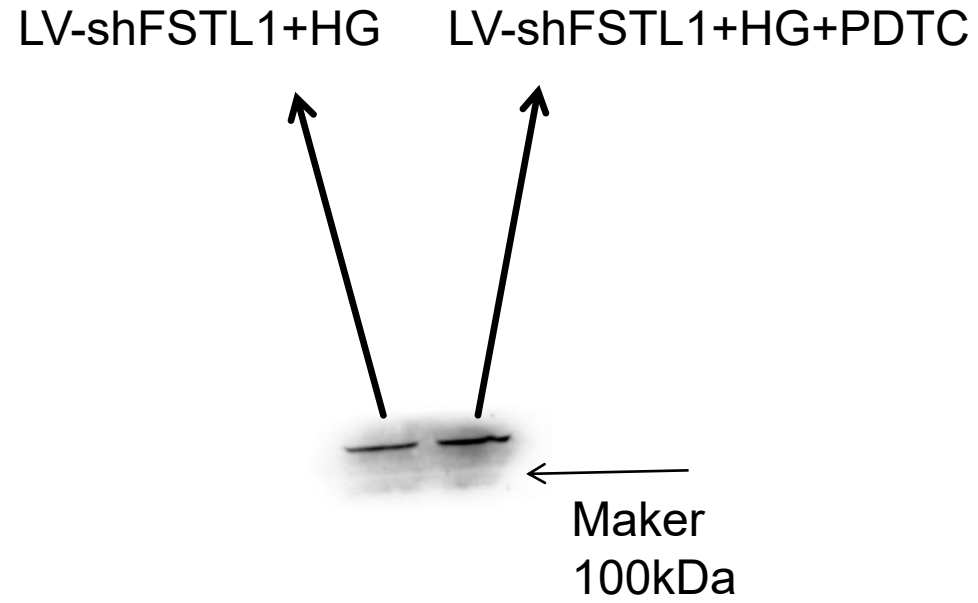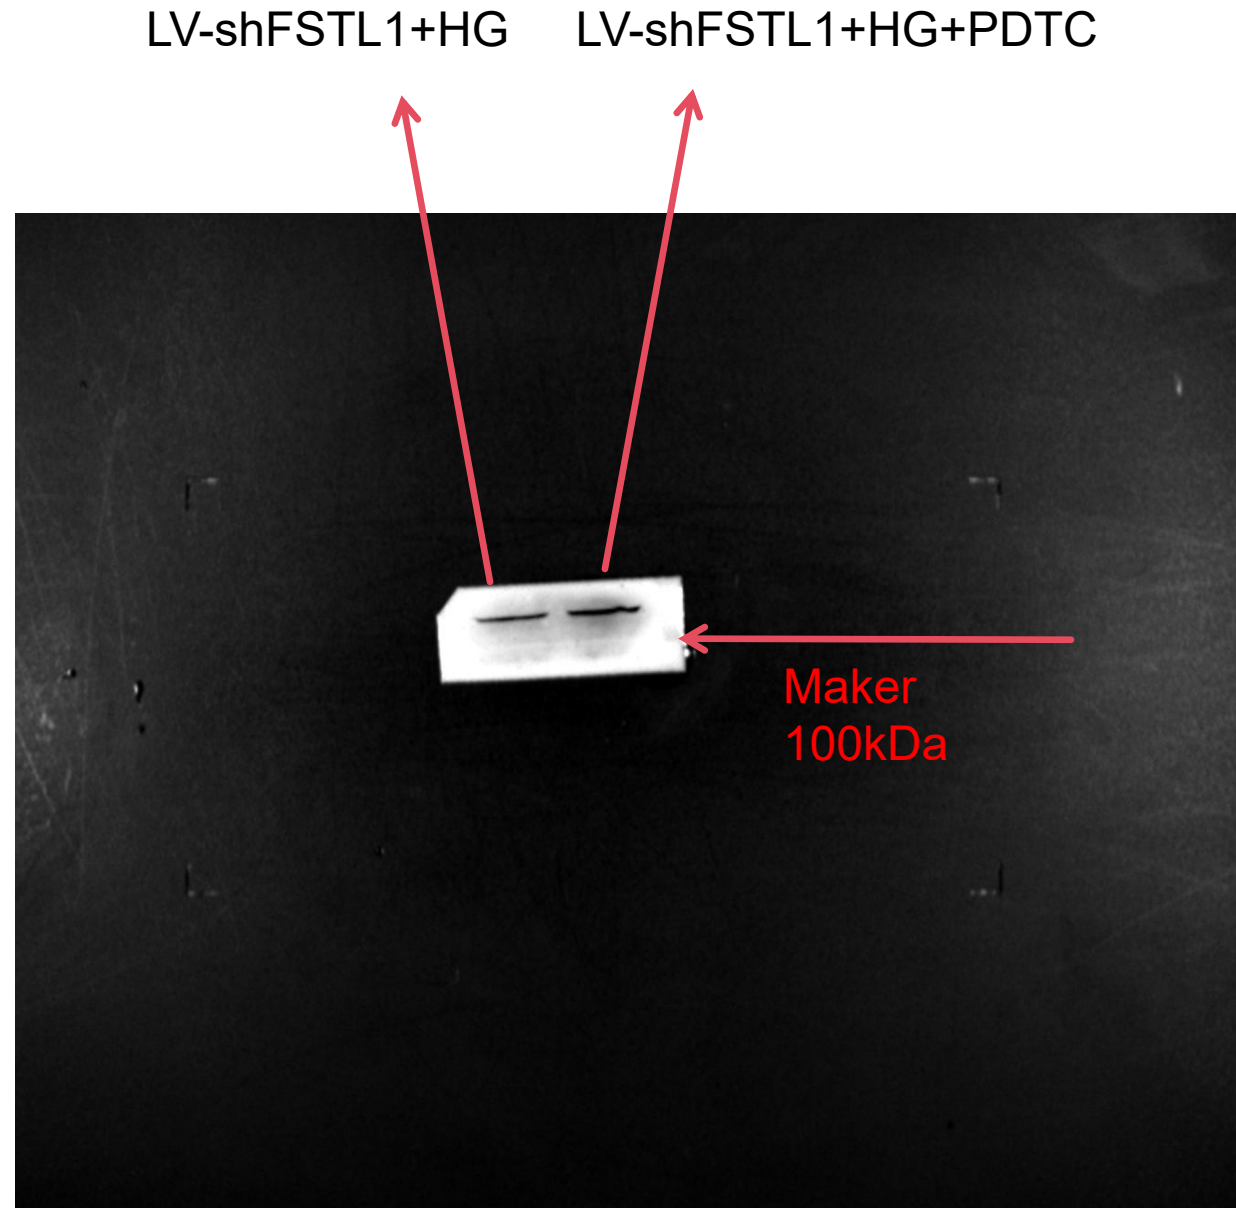

E-cadherin-120kDa

2023-11-13

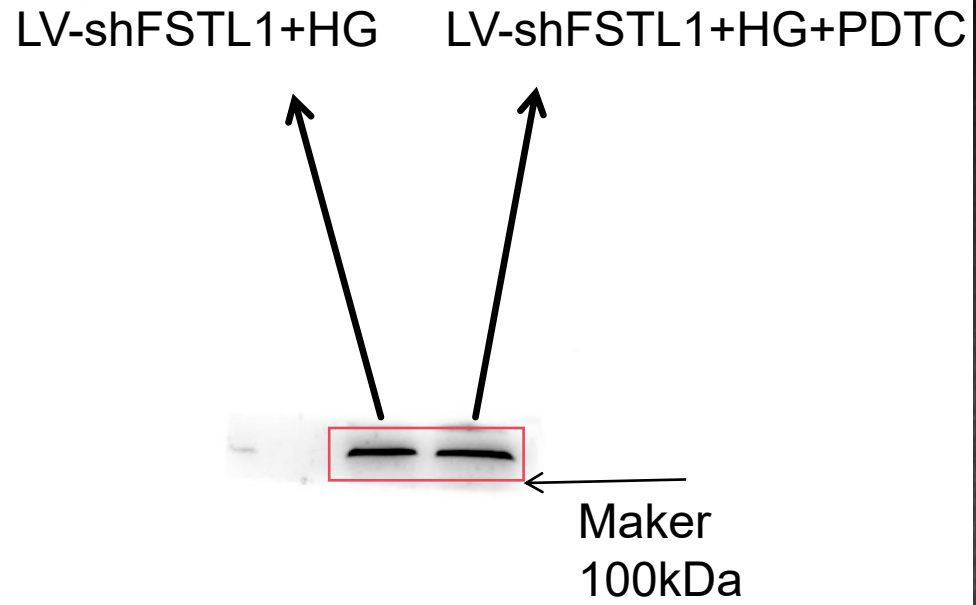

LV-shFSTL1+HG    LV-shFSTL1+HG+PDTC

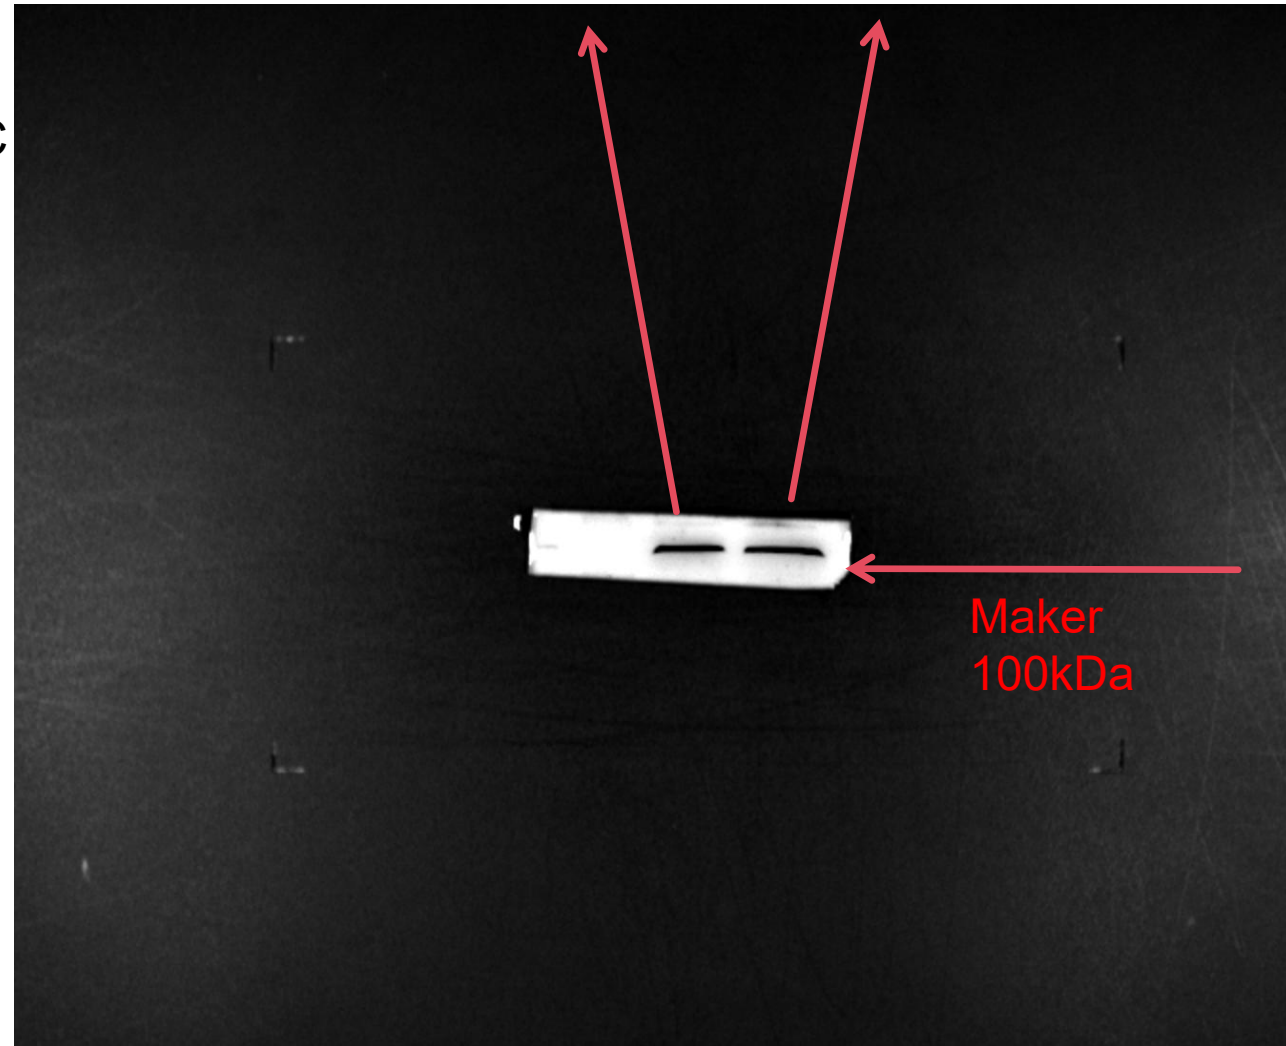

E-cadherin-120kDa

2023-11-22

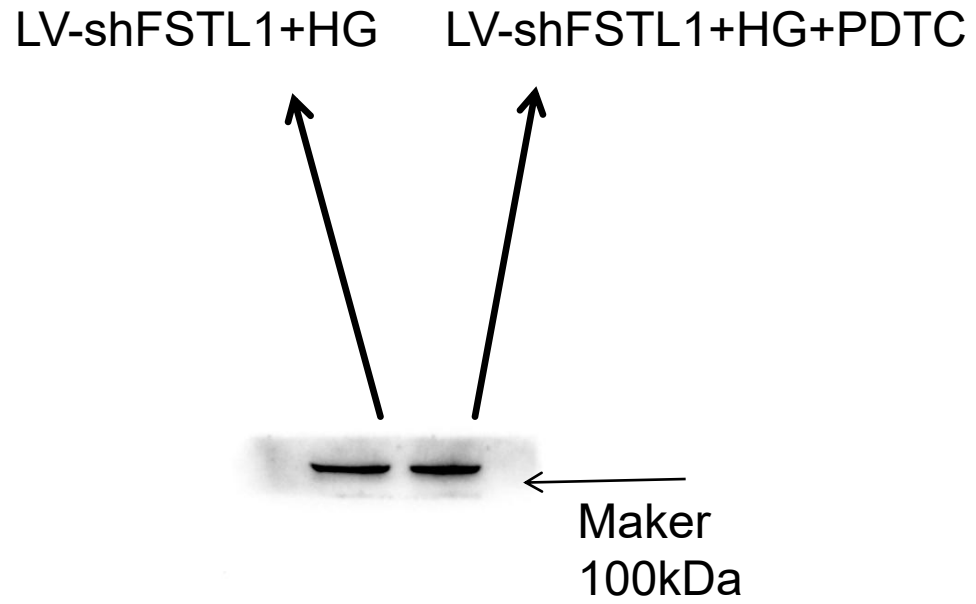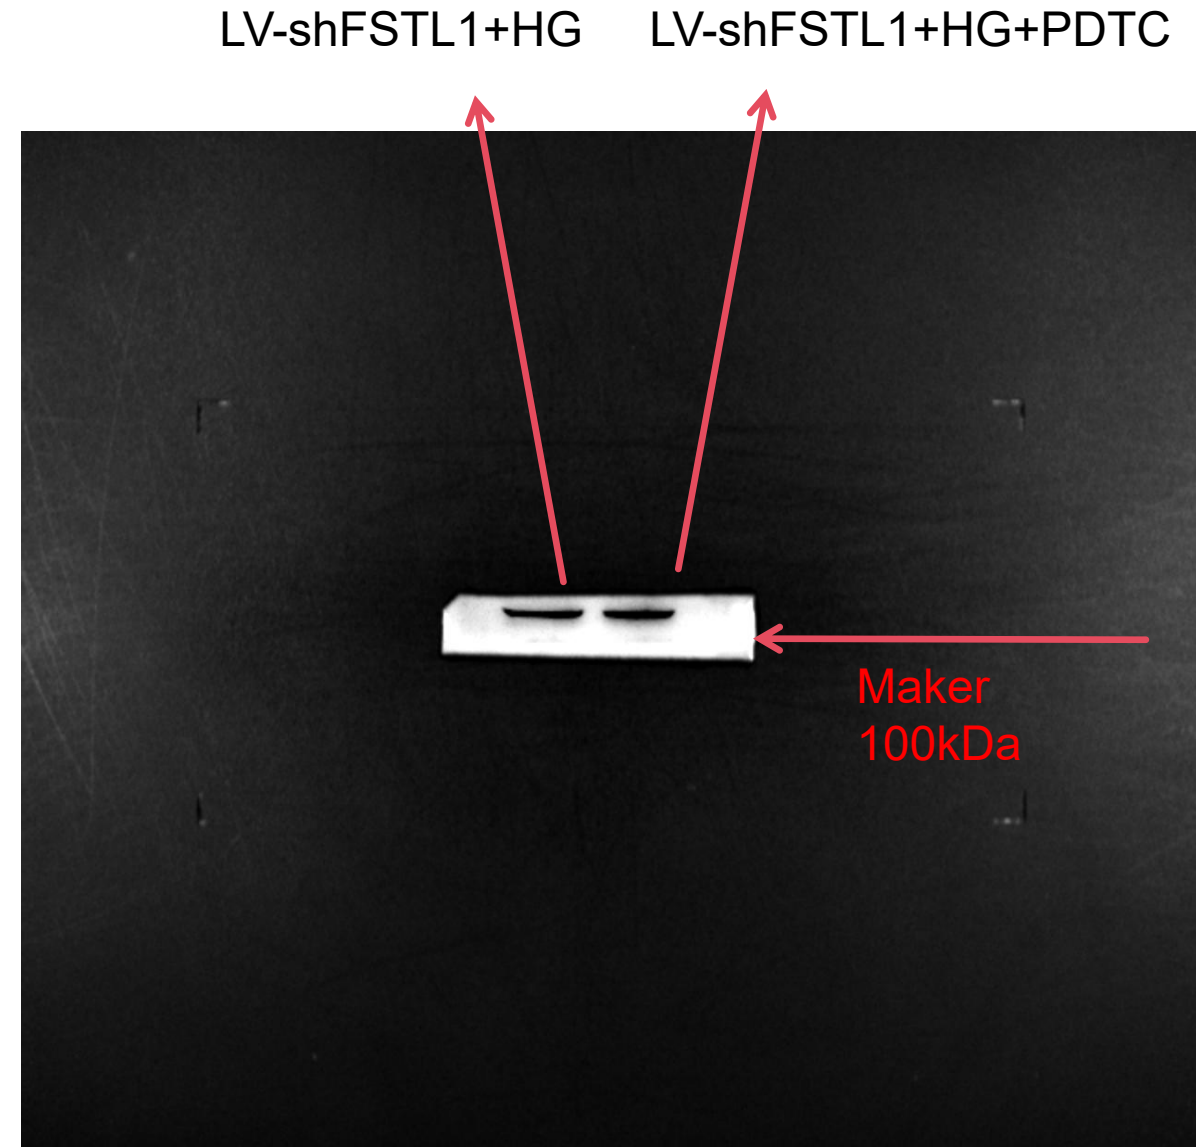

FN-263kDa

2023-11-06

LV-shFSTL1+HG    LV-shFSTL1+HG+PDTC

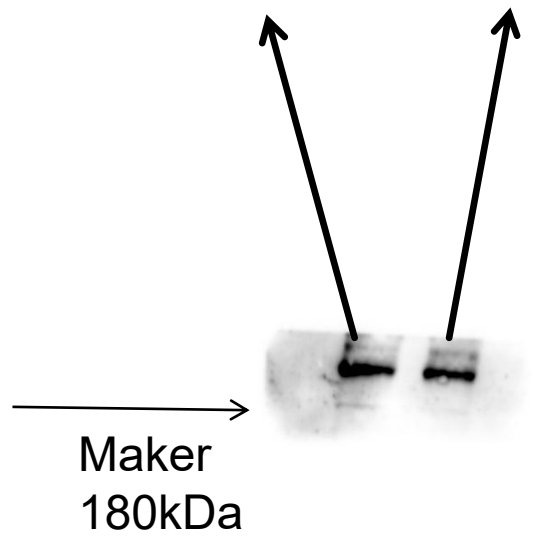

LV-shFSTL1+HG    LV-shFSTL1+HG+PDTC

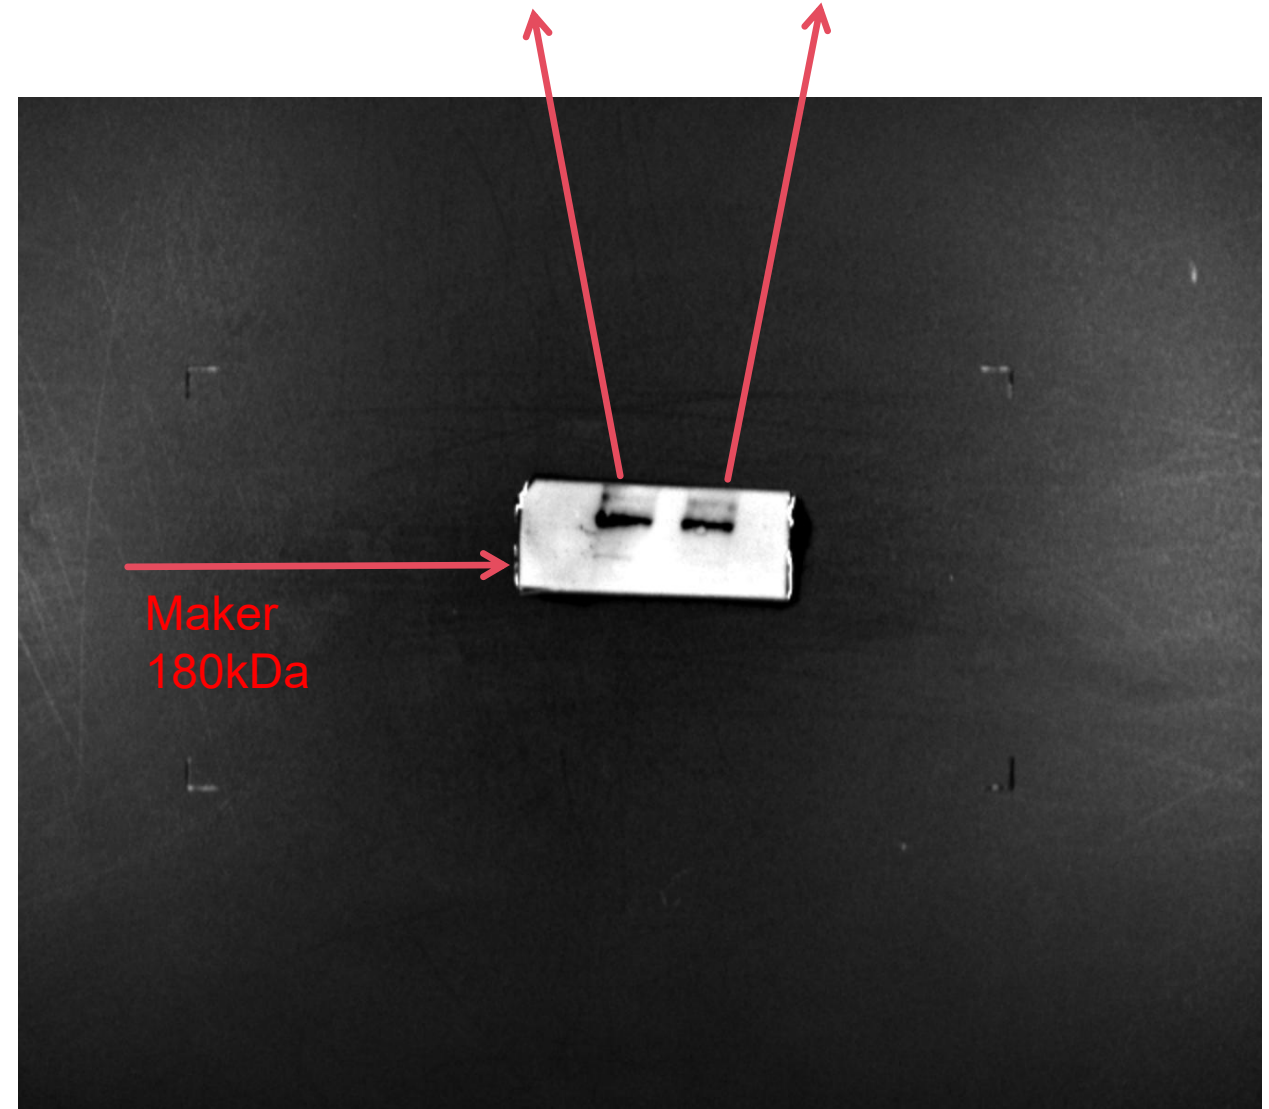

FN-263kDa

2023-11-19

LV-shFSTL1+HG    LV-shFSTL1+HG+PDTC

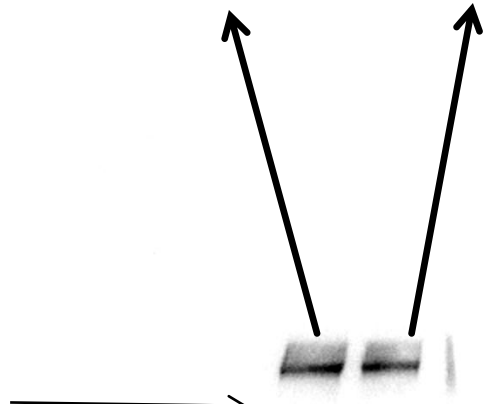

Maker  
180kDa

LV-shFSTL1+HG    LV-shFSTL1+HG+PDTC

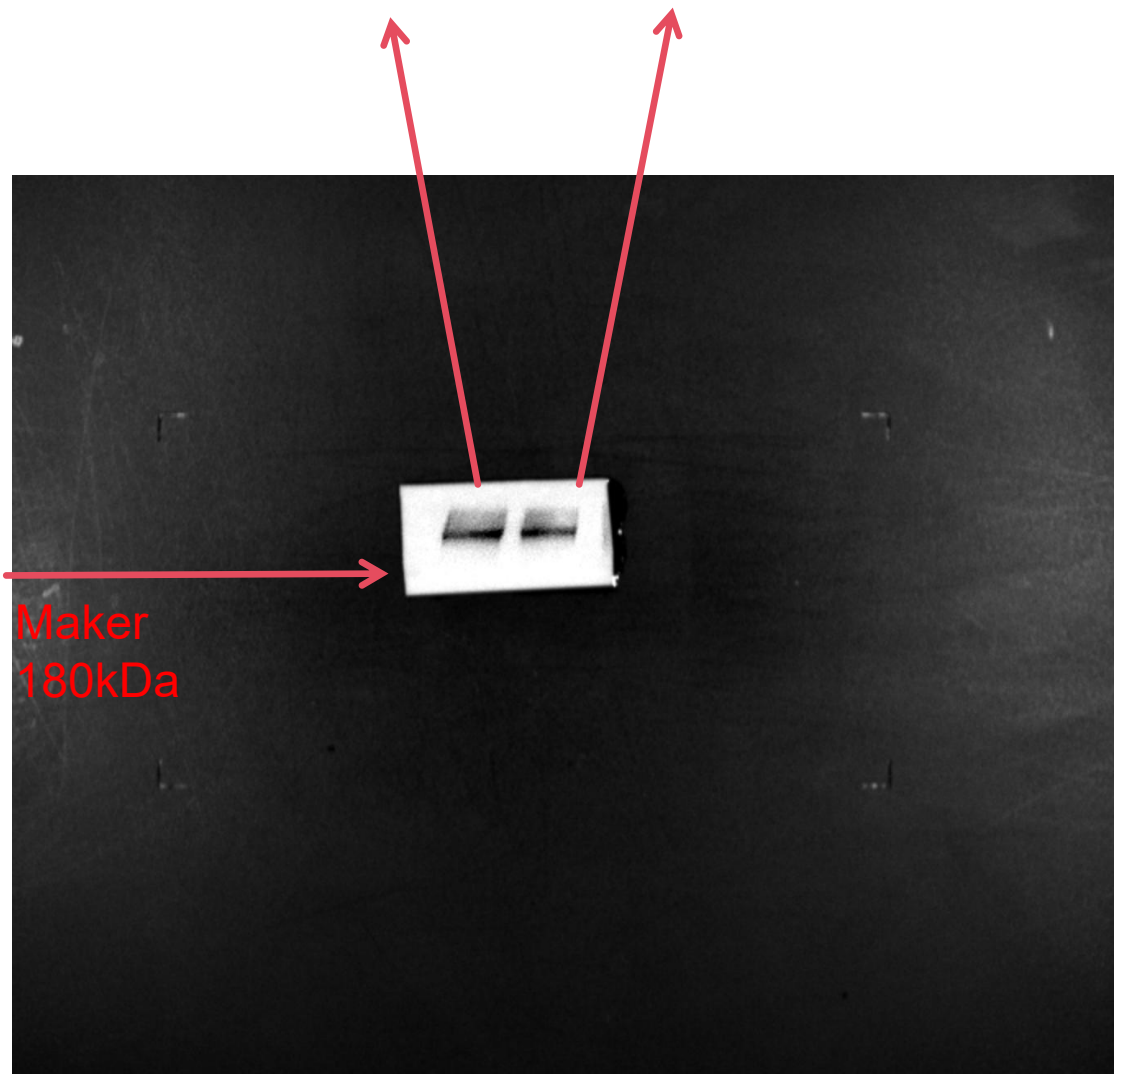

Maker  
180kDa

FN-263kDa

2023-11-28

LV-shFSTL1+HG    LV-shFSTL1+HG+PDTC

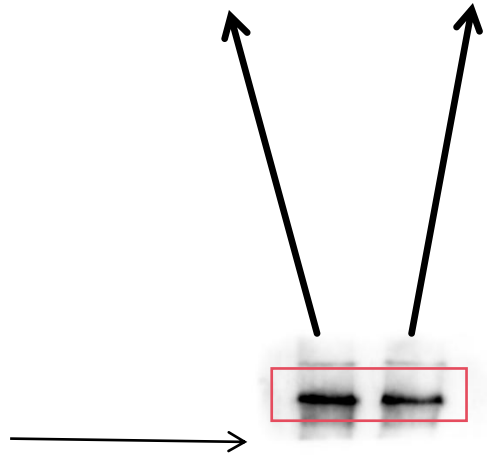

Maker  
180kDa

LV-shFSTL1+HG

LV-shFSTL1+HG+PDTC

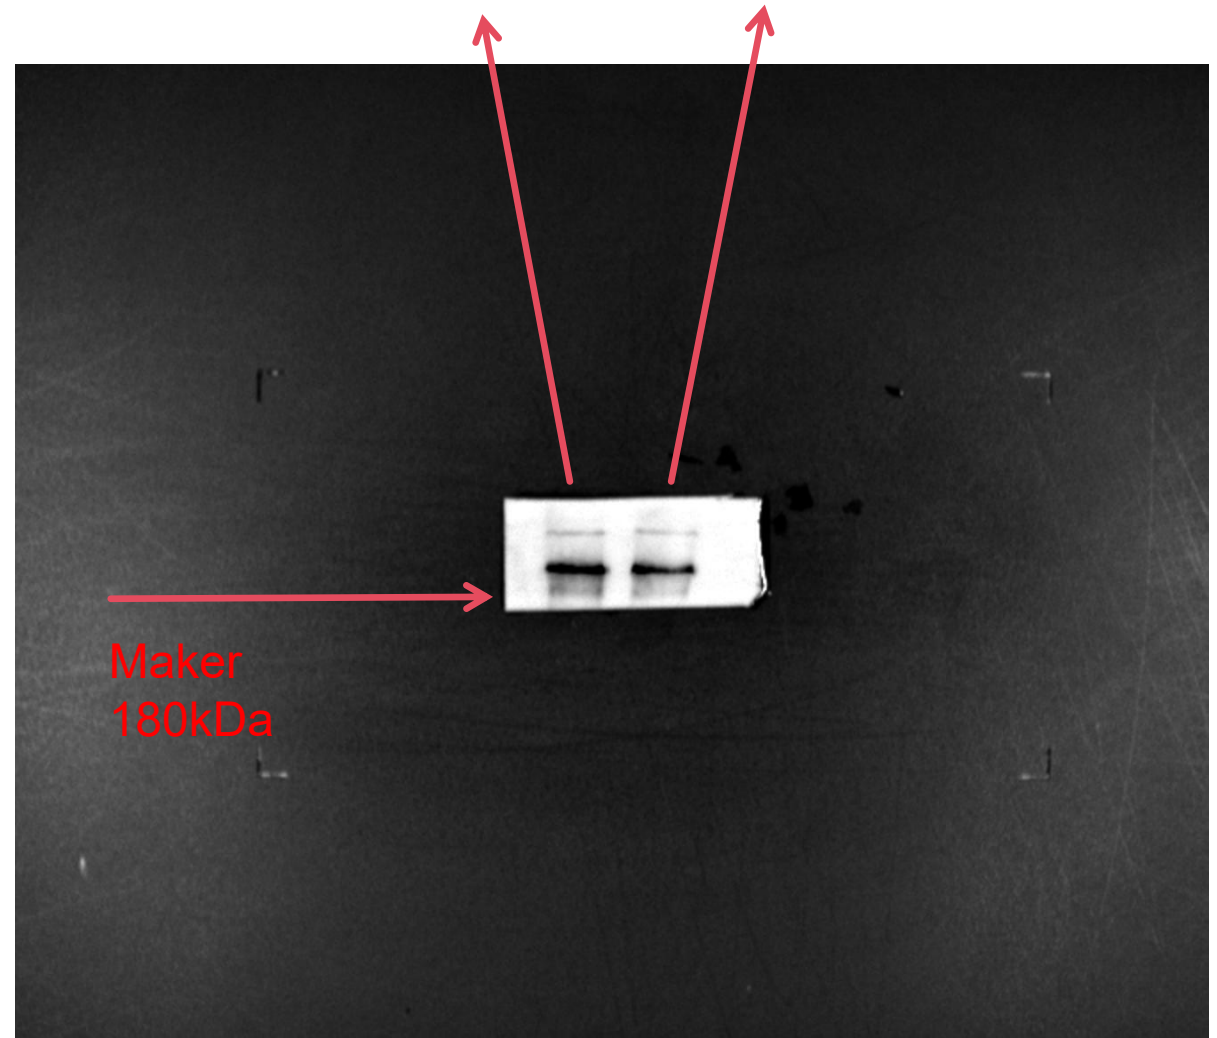

Maker  
180kDa



$\alpha$ -SMA-45kDa

2023-11-06

LV-shFSTL1+HG    LV-shFSTL1+HG+PDTC

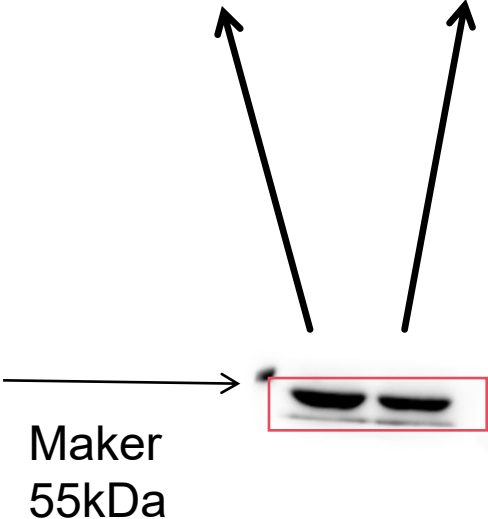

LV-shFSTL1+HG    LV-shFSTL1+HG+PDTC

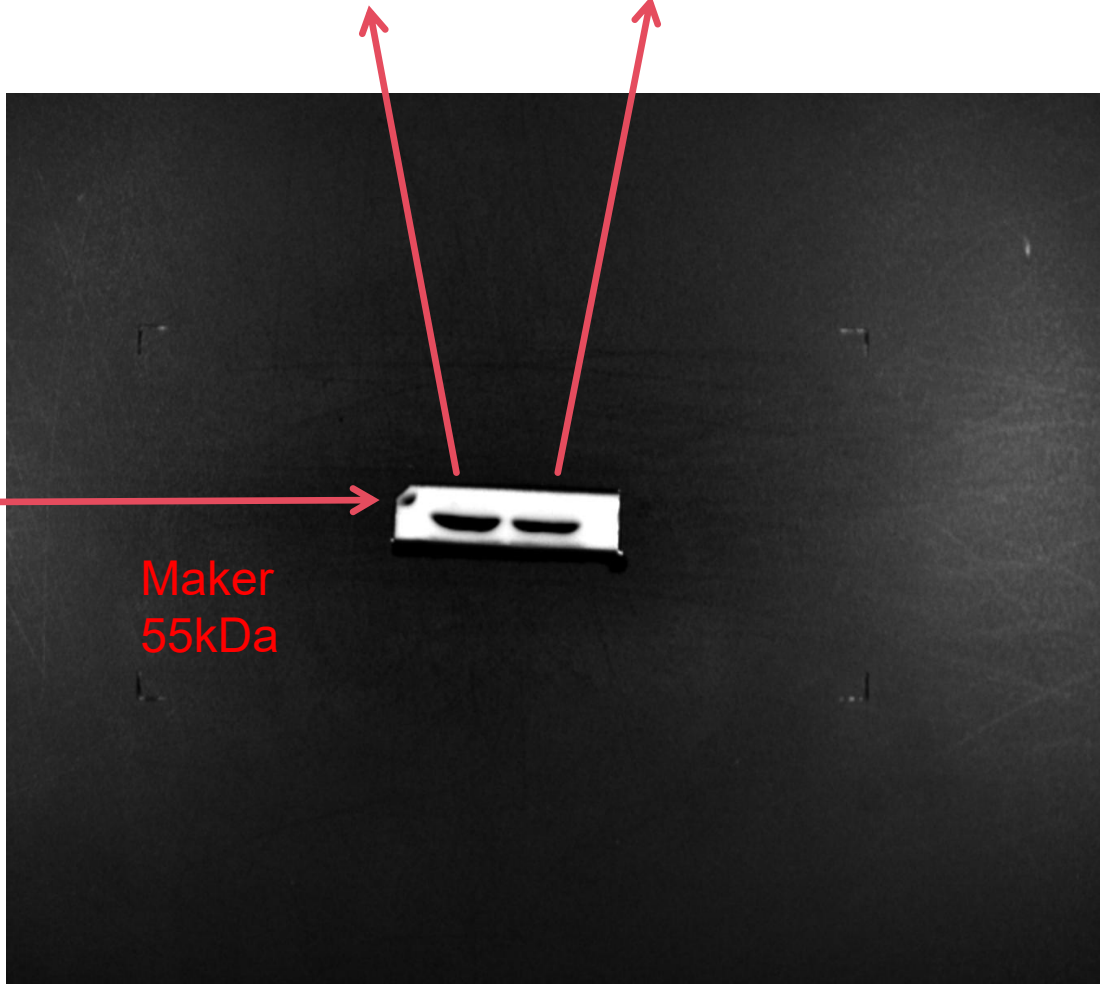

$\alpha$ -SMA-45kDa

2023-11-11

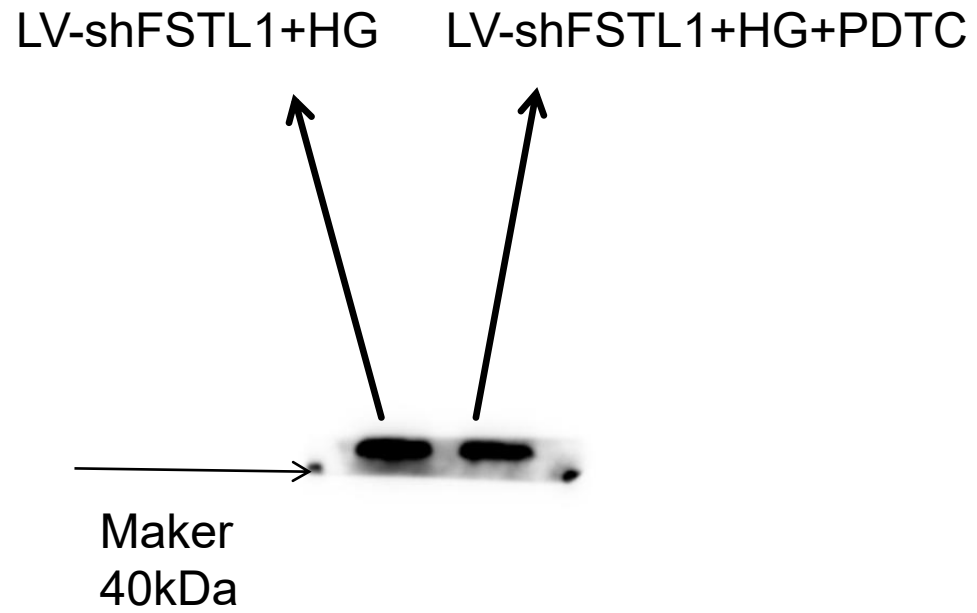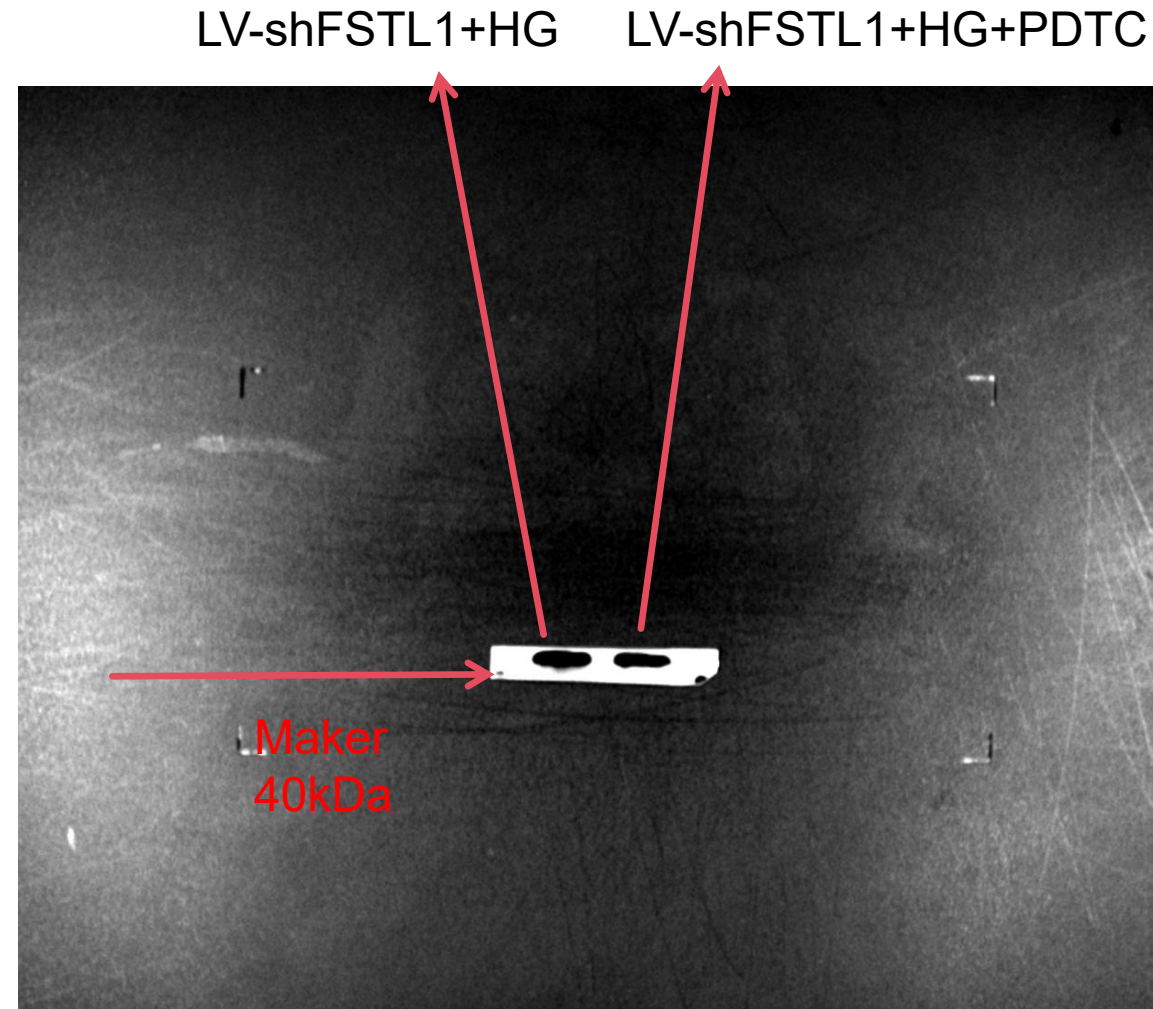

$\alpha$ -SMA-45kDa

2023-11-25

LV-shFSTL1+HG    LV-shFSTL1+HG+PDTC

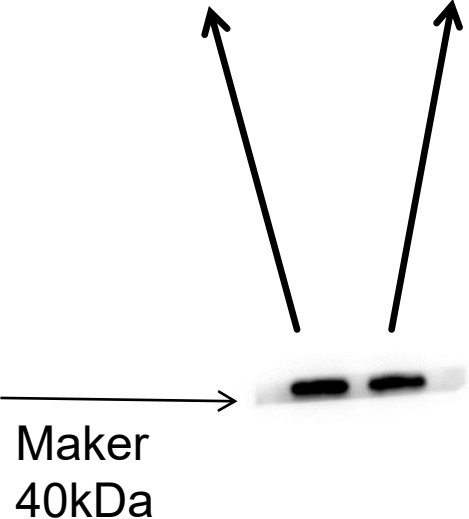

LV-shFSTL1+HG    LV-shFSTL1+HG+PDTC

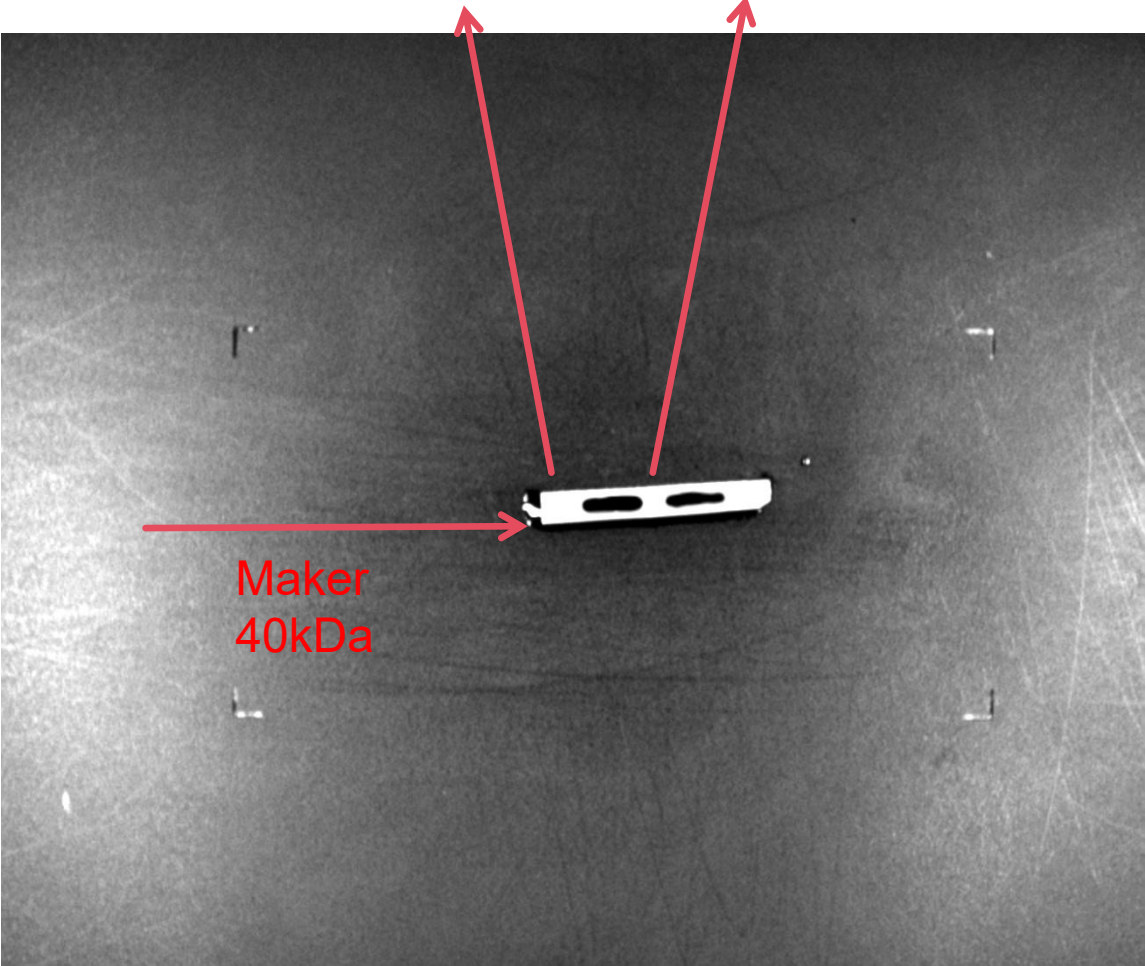

$\beta$ -actin

2023-11-03

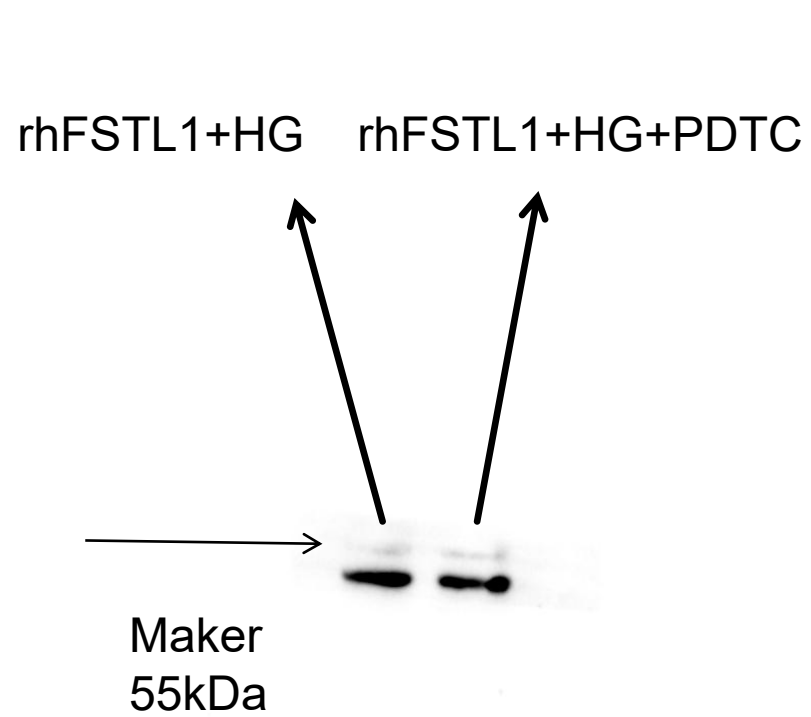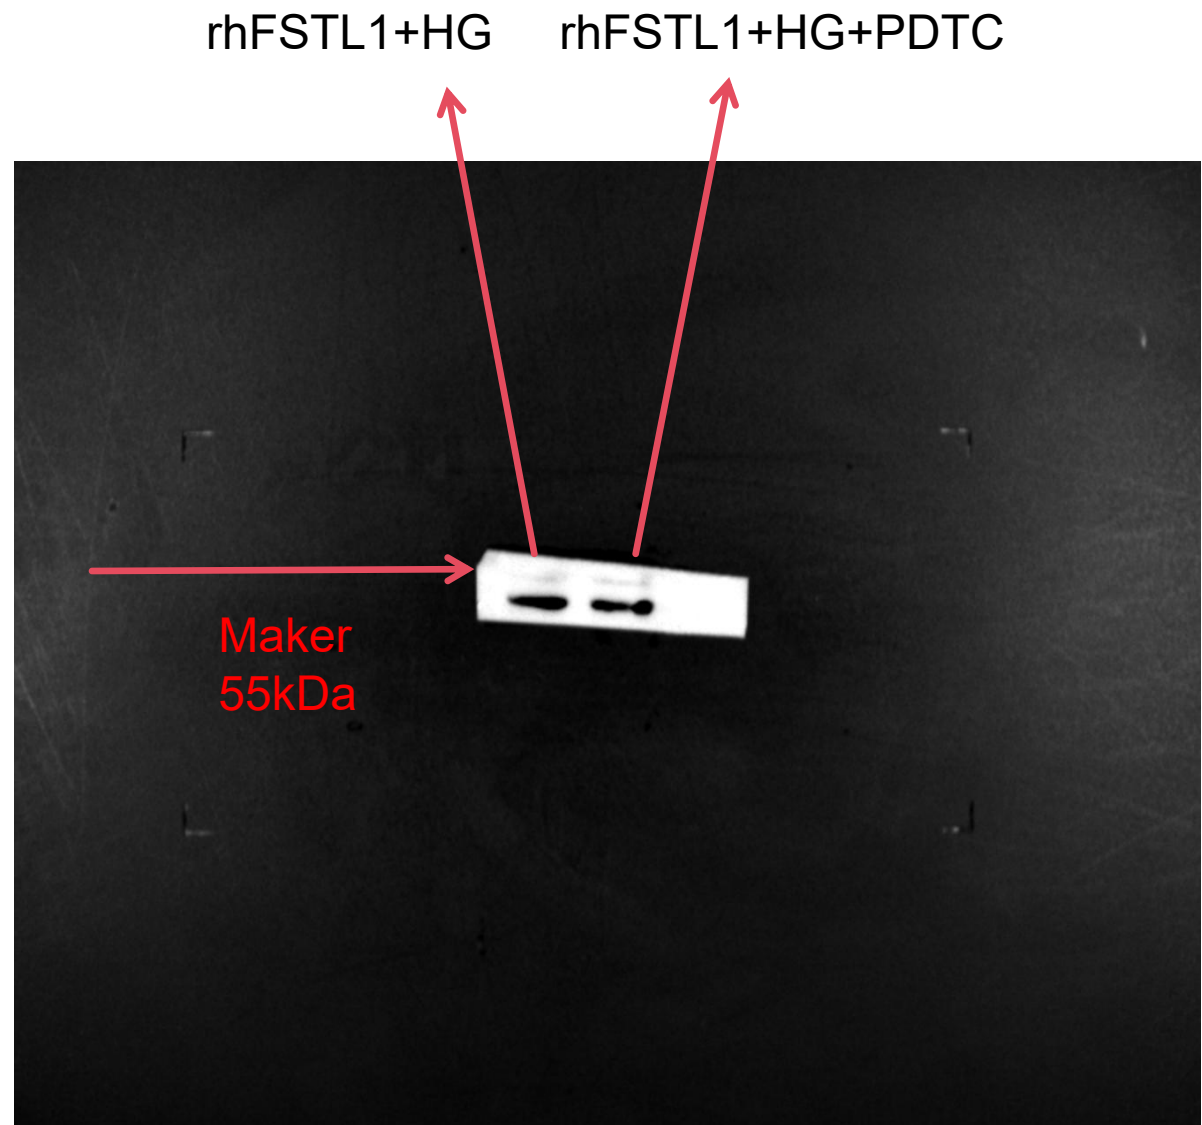

$\beta$ -actin

2023-11-10

rhFSTL1+HG    rhFSTL1+HG+PDTC

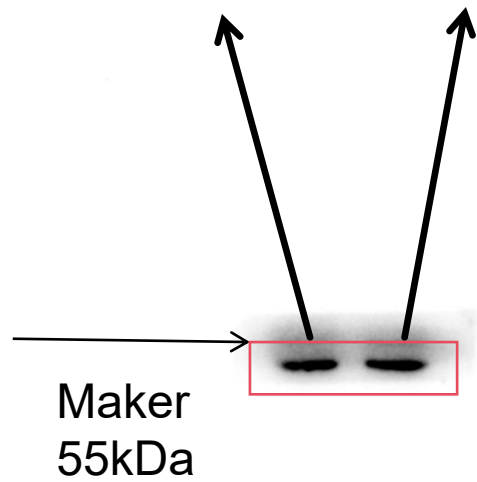

rhFSTL1+HG    rhFSTL1+HG+PDTC

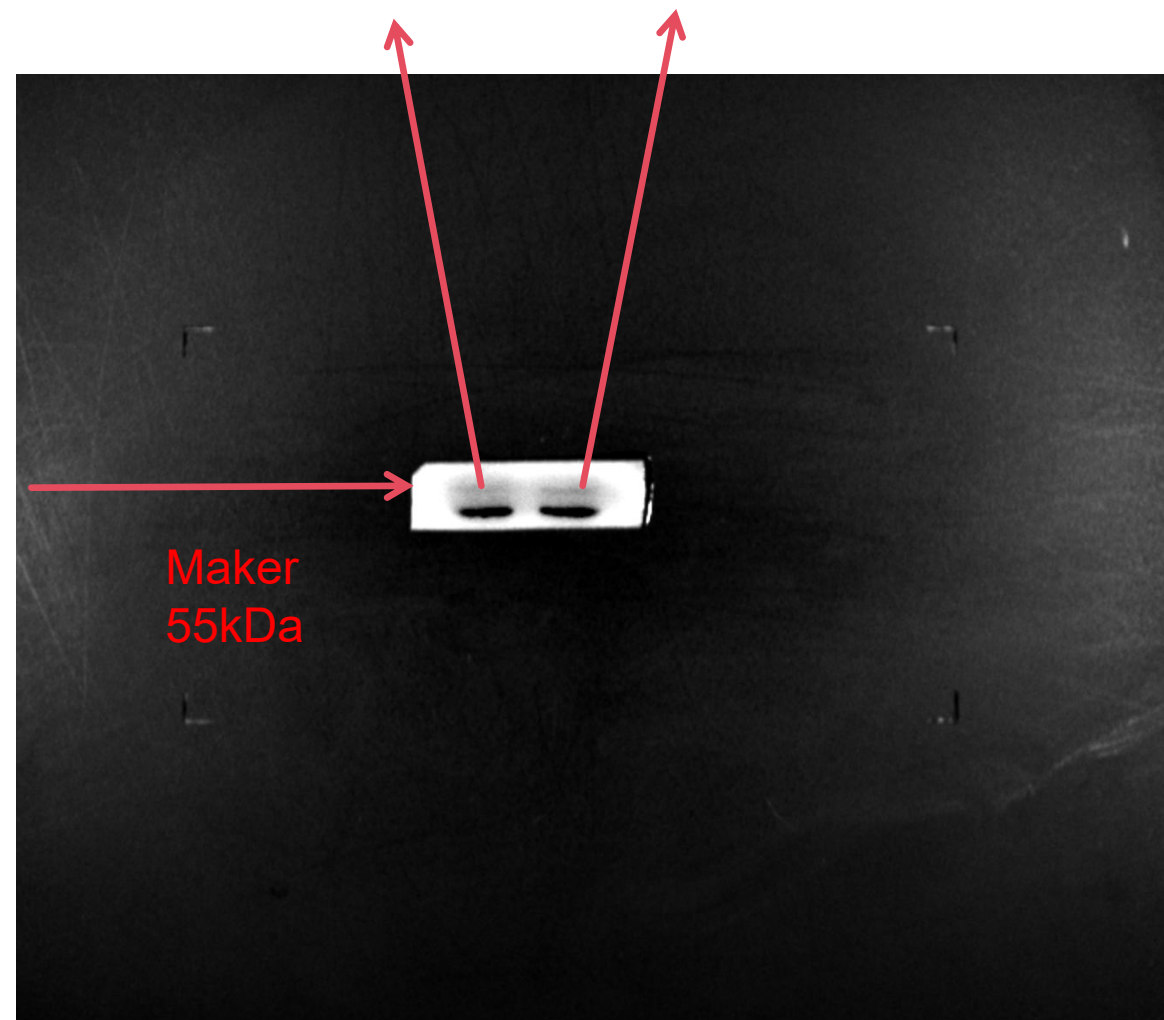

$\beta$ -actin

2023-11-19

rhFSTL1+HG    rhFSTL1+HG+PDTC

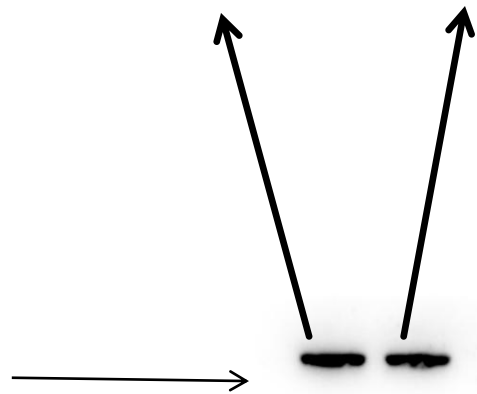

Maker  
40kDa

rhFSTL1+HG    rhFSTL1+HG+PDTC

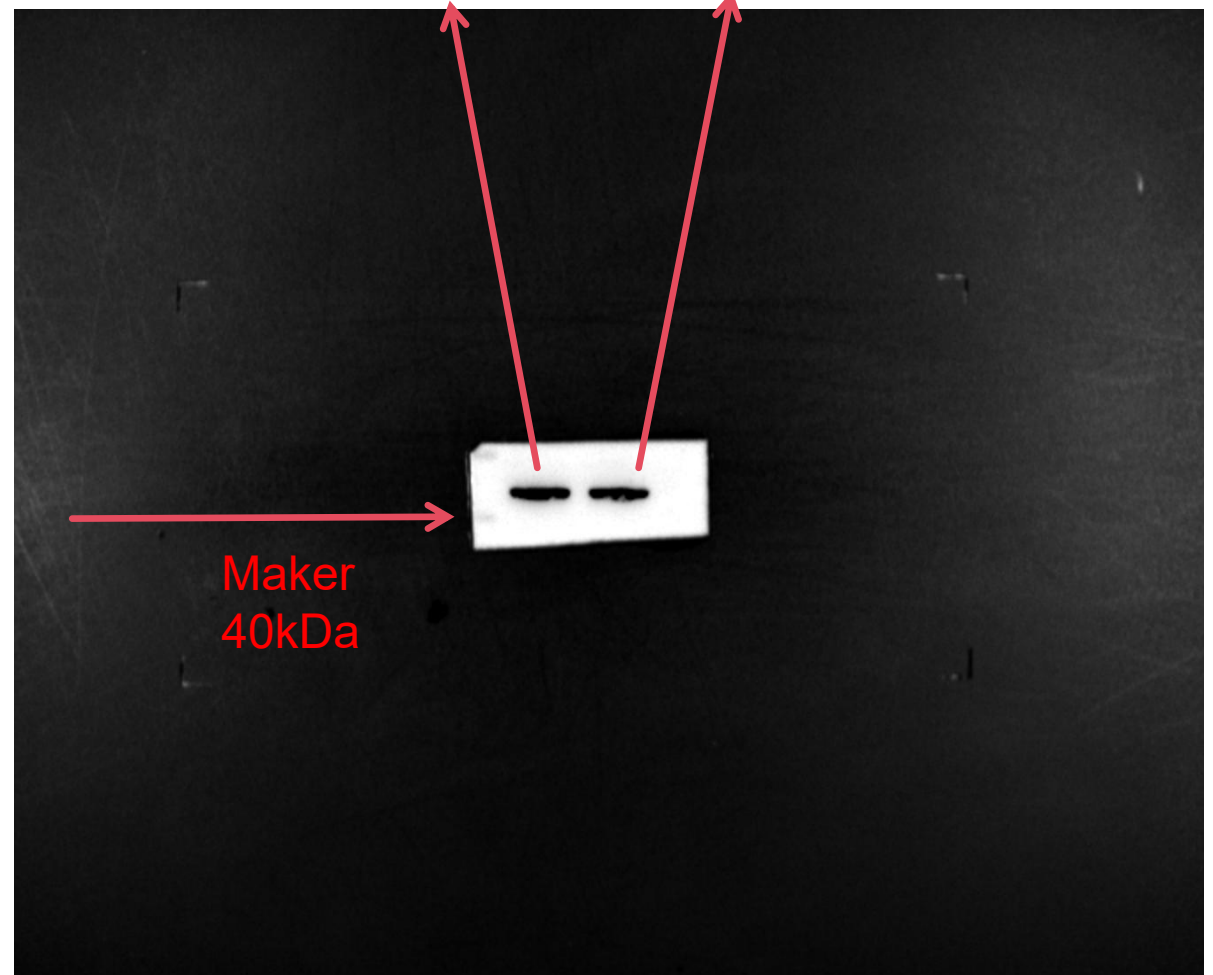

Maker  
40kDa

E-cadherin-120kDa

2023-11-05

rhFSTL1+HG    rhFSTL1+HG+PDTC

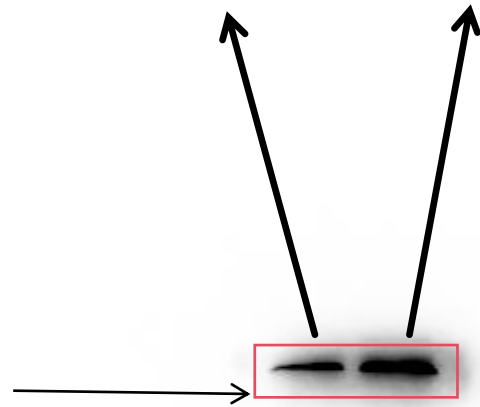

Maker  
100kDa

rhFSTL1+HG    rhFSTL1+HG+PDTC

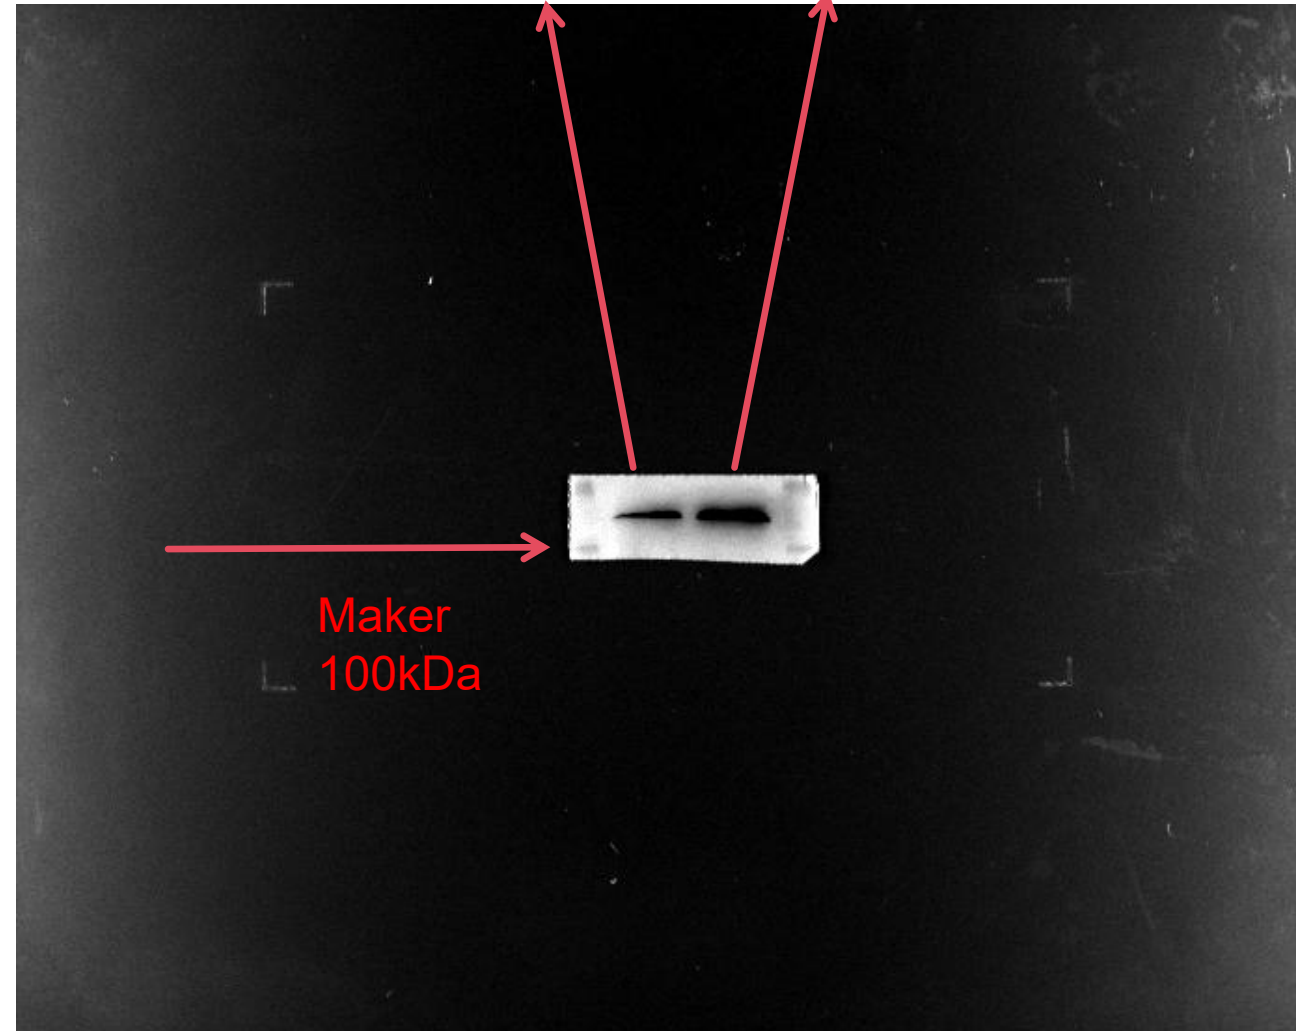

Maker  
100kDa

E-cadherin-120kDa

2023-11-14

rhFSTL1+HG    rhFSTL1+HG+PDTC

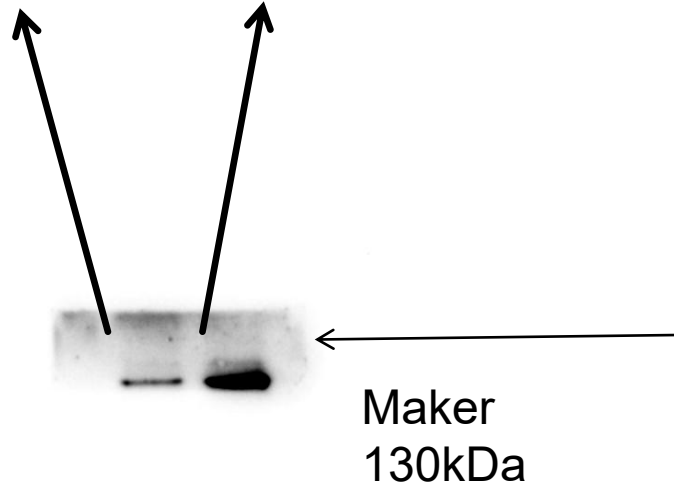

rhFSTL1+HG    rhFSTL1+HG+PDTC

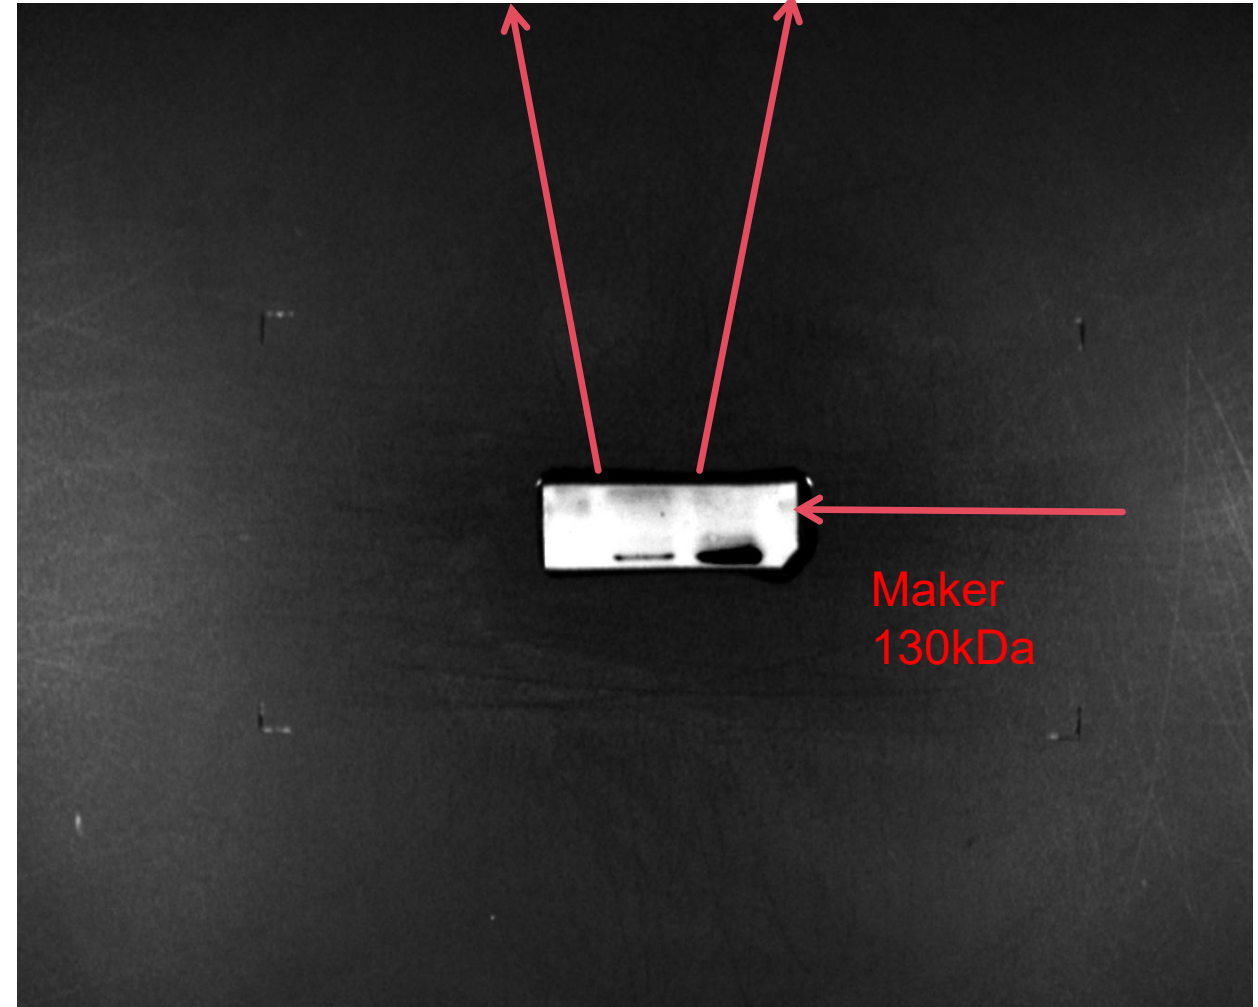



E-cadherin-120kDa

2023-11-23

rhFSTL1+HG rhFSTL1+HG+PDTC

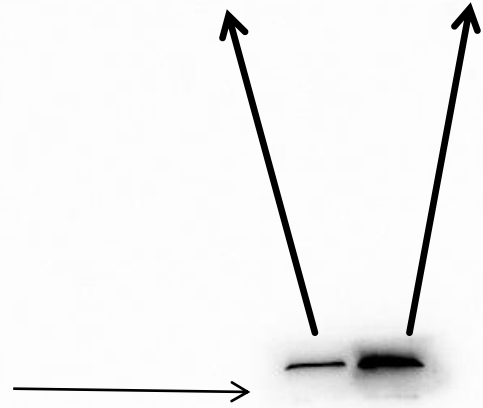

Maker  
100kDa

rhFSTL1+HG rhFSTL1+HG+PDTC

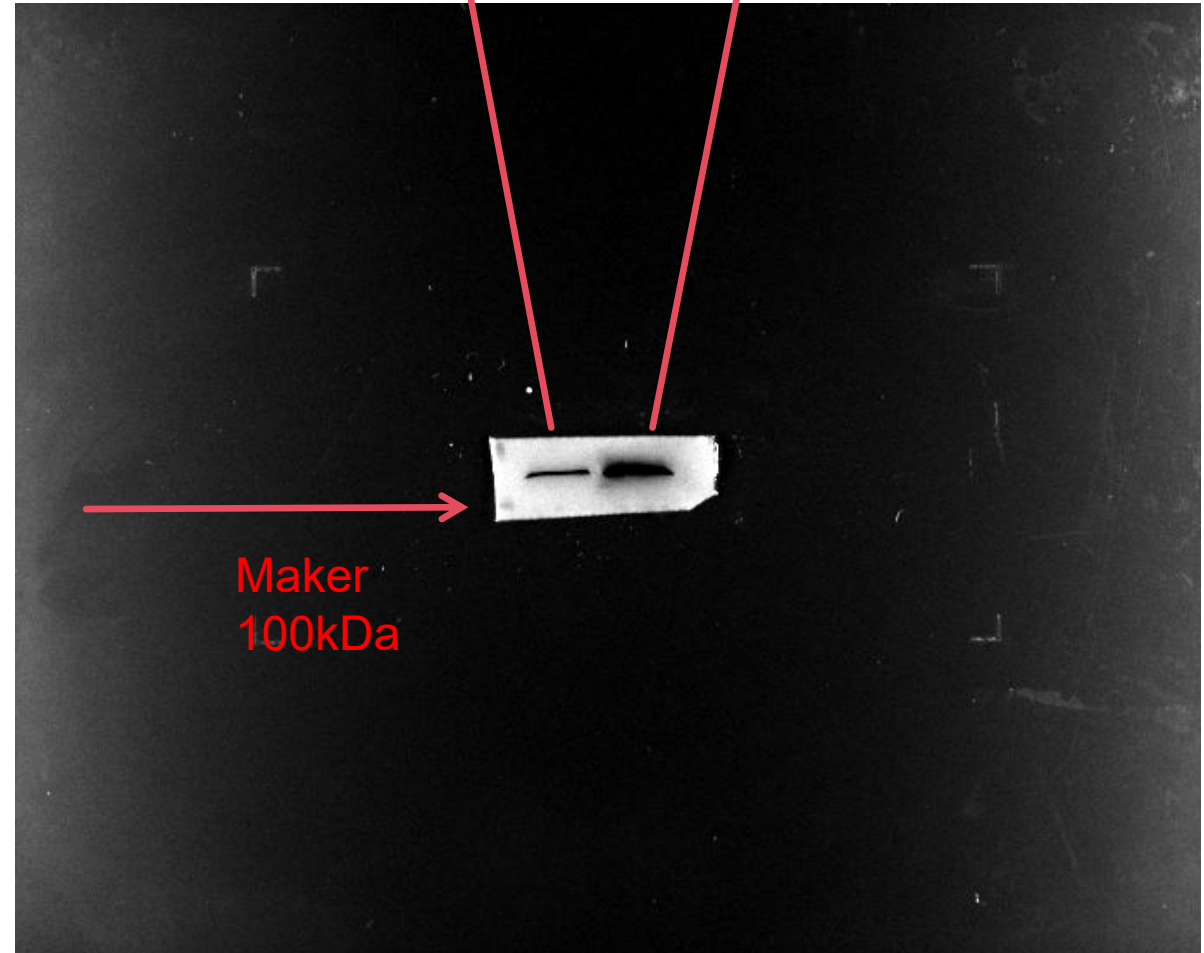

Maker  
100kDa

FN-263kDa

2023-11-07

rhFSTL1+HG    rhFSTL1+HG+PDTC

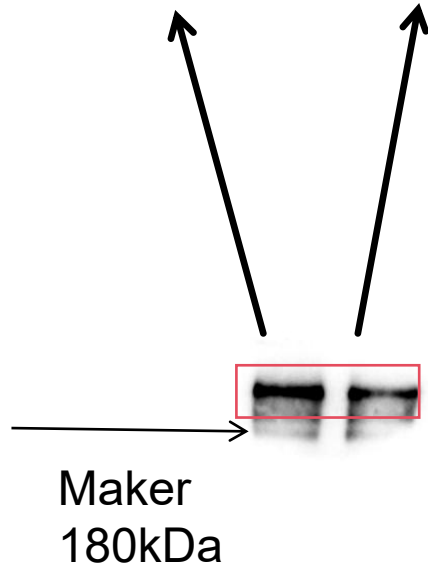

rhFSTL1+HG

rhFSTL1+HG+PDTC

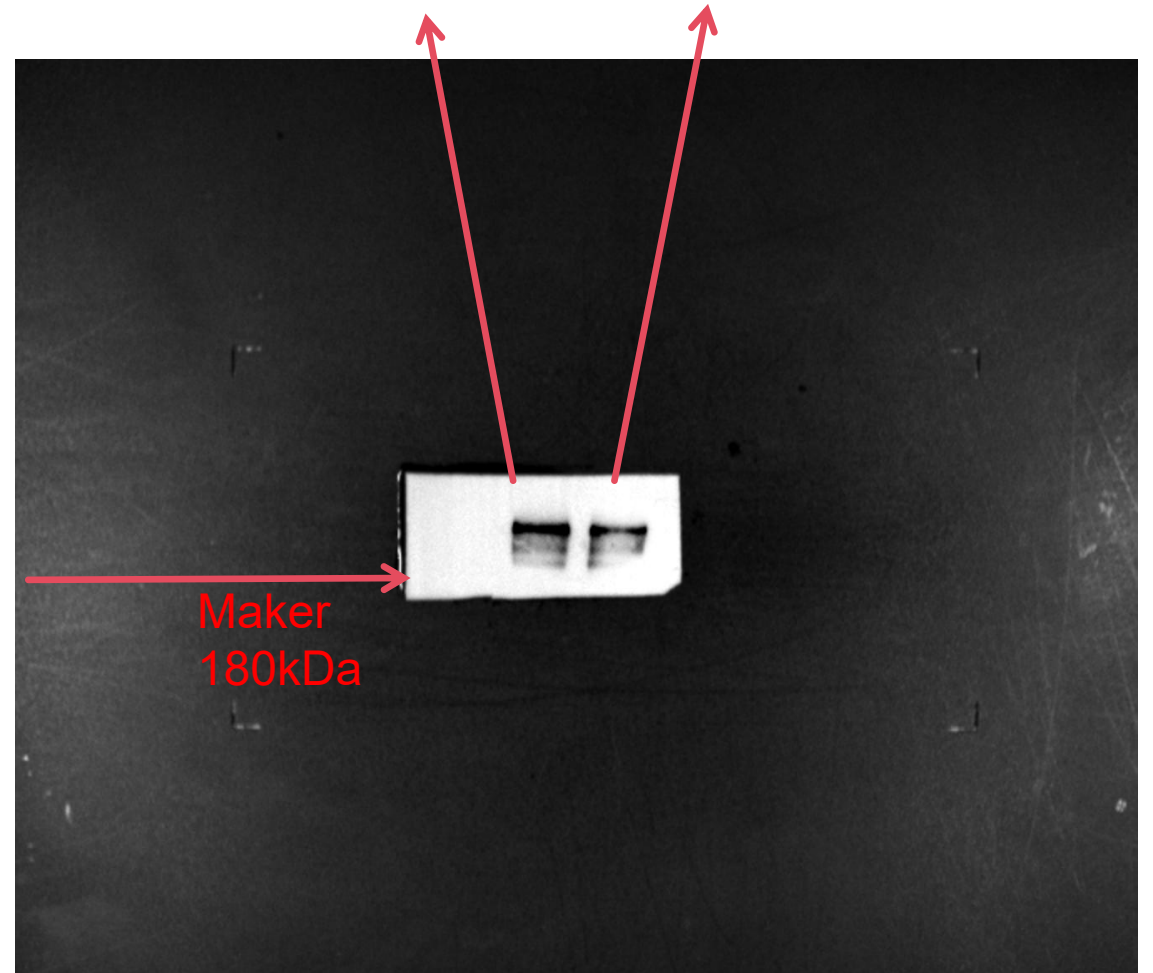

FN-263kDa

2023-11-20

rhFSTL1+HG    rhFSTL1+HG+PDTC

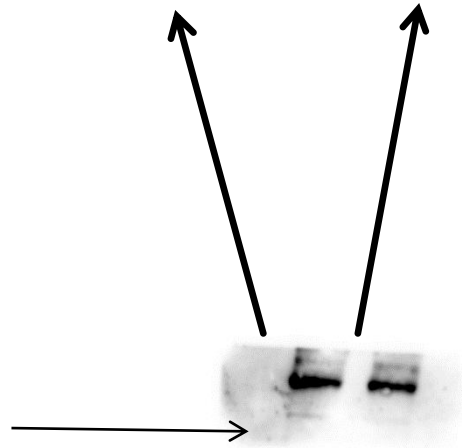

Maker  
180kDa

rhFSTL1+HG

rhFSTL1+HG+PDTC

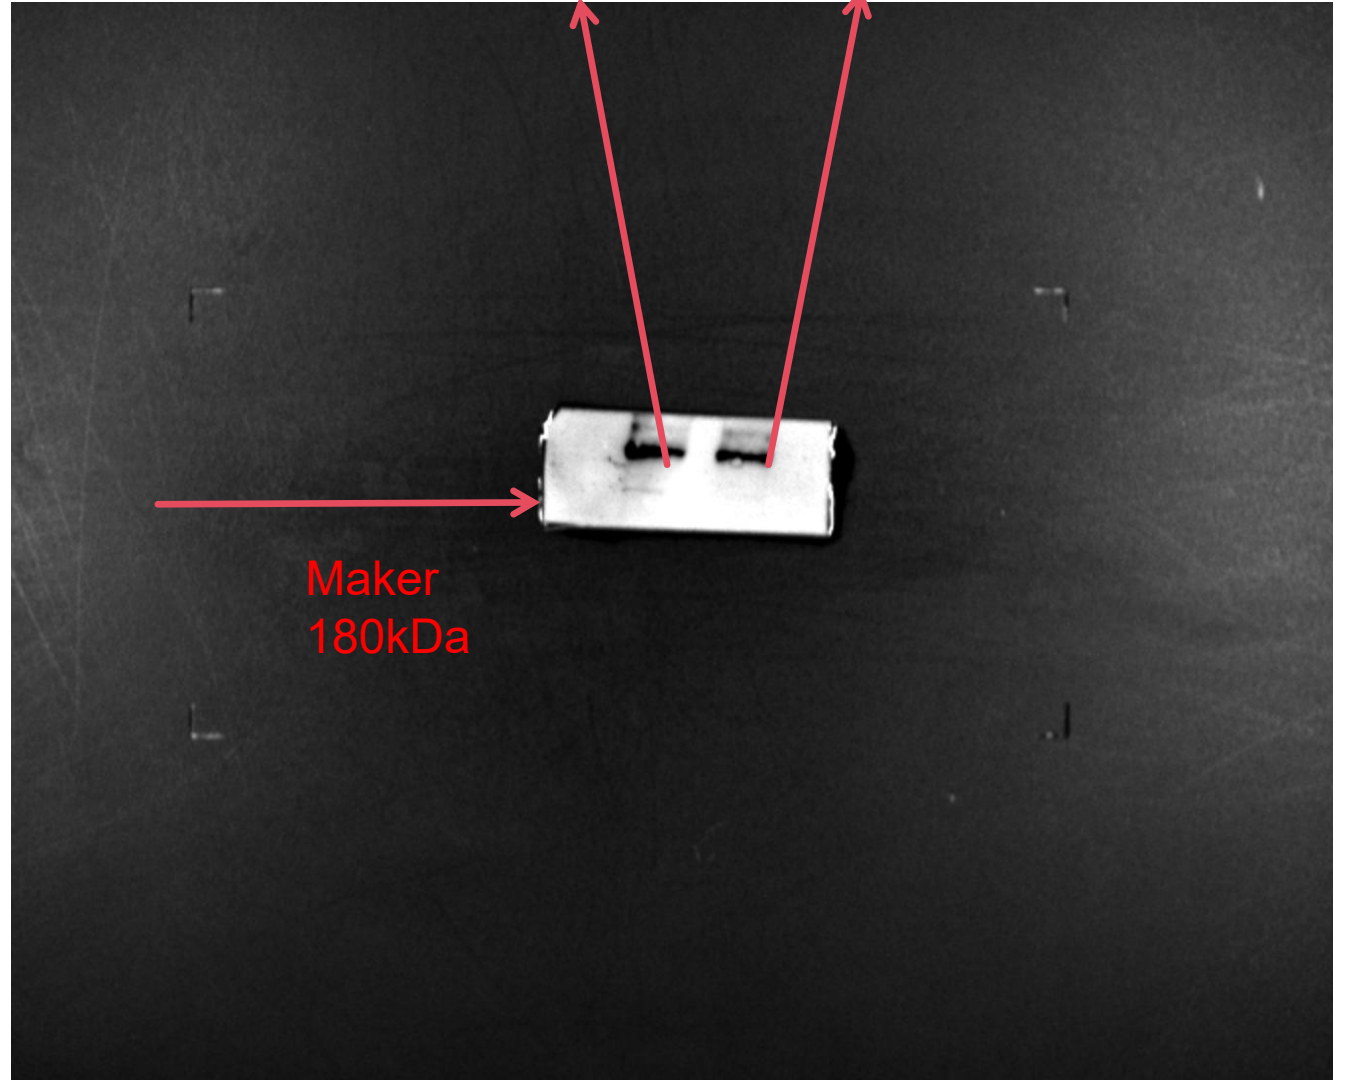

Maker  
180kDa

FN-263kDa

2023-11-29

rhFSTL1+HG    rhFSTL1+HG+PDTC

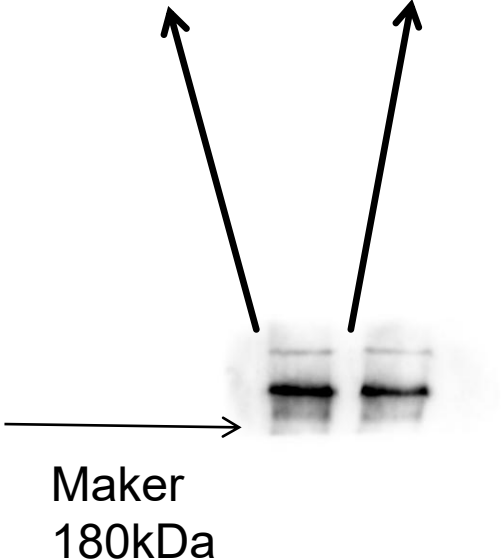

rhFSTL1+HG    rhFSTL1+HG+PDTC

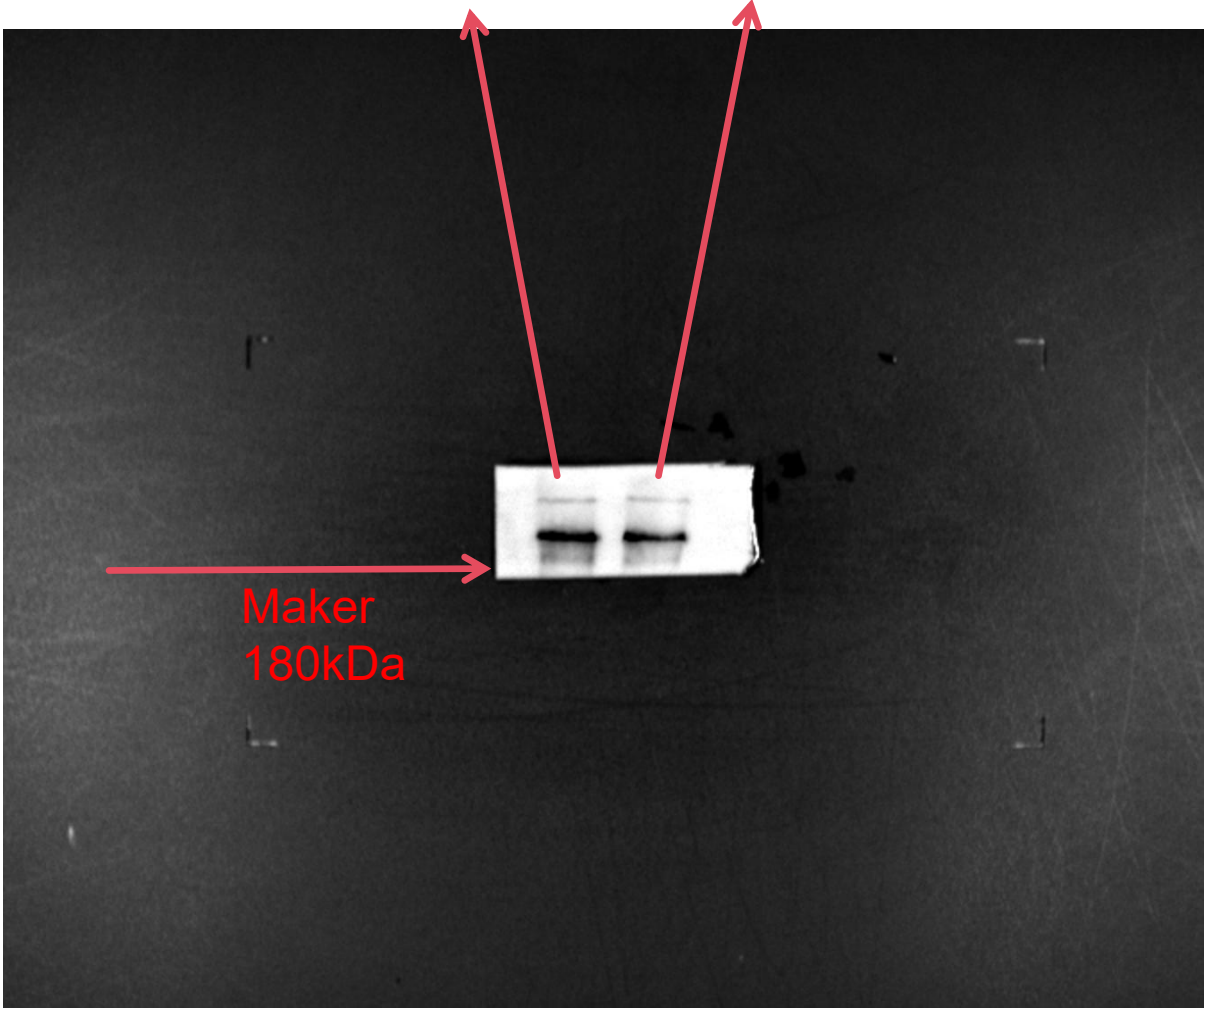

$\alpha$ -SMA-45kDa

2023-11-07

rhFSTL1+HG    rhFSTL1+HG+PDTC

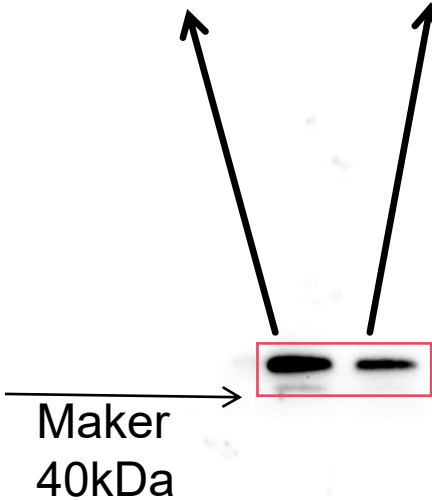

rhFSTL1+HG    rhFSTL1+HG+PDTC

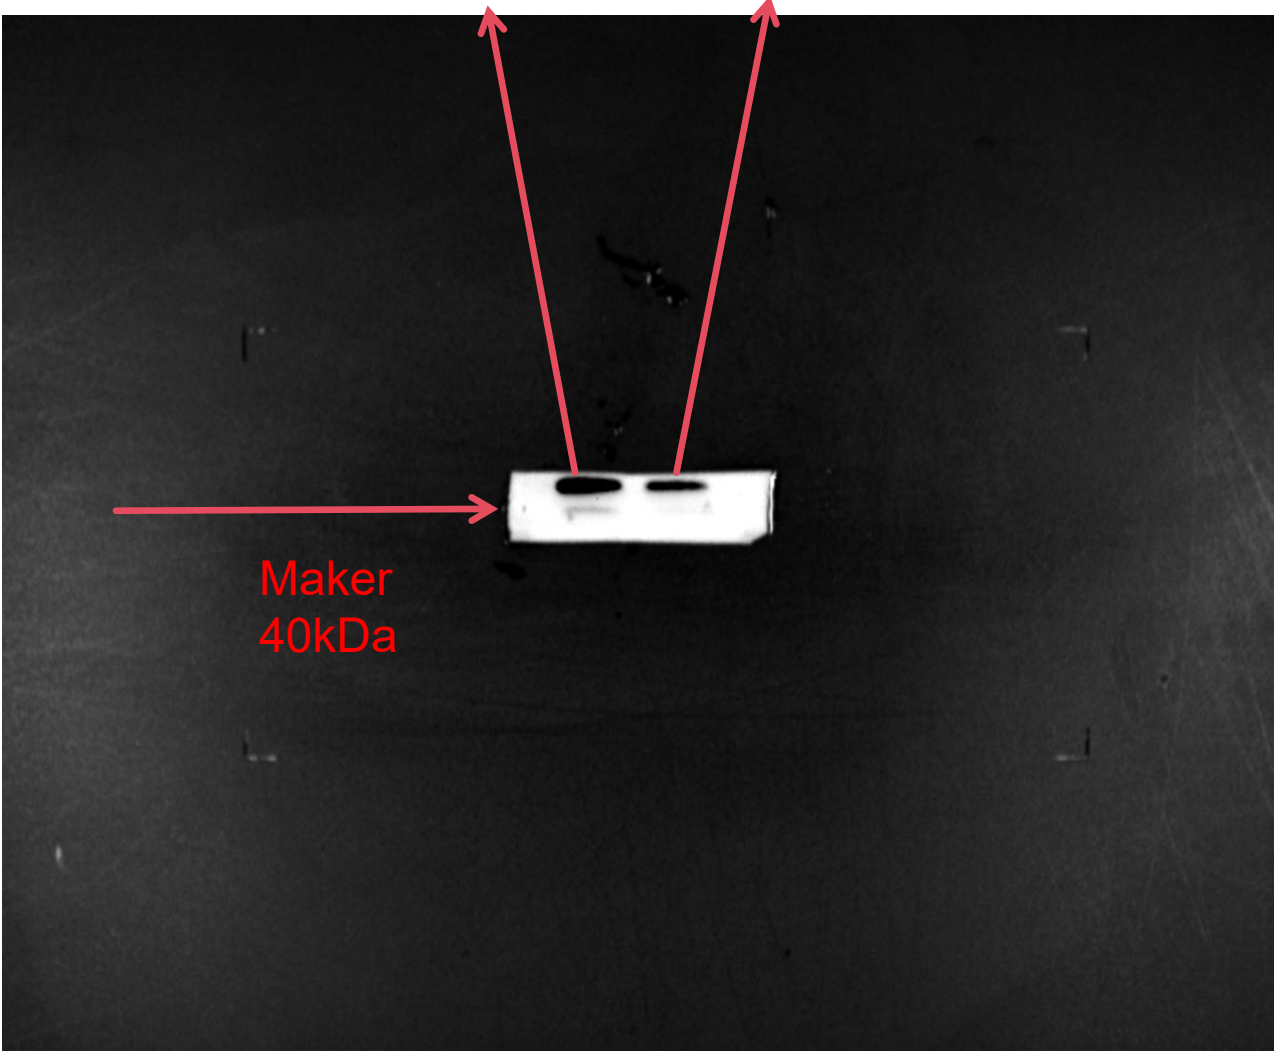

$\alpha$ -SMA-45kDa

2023-11-12

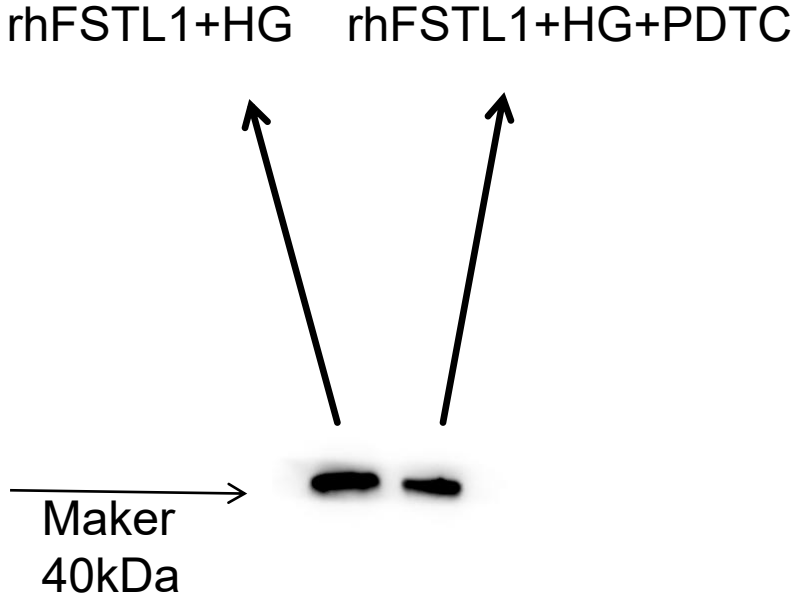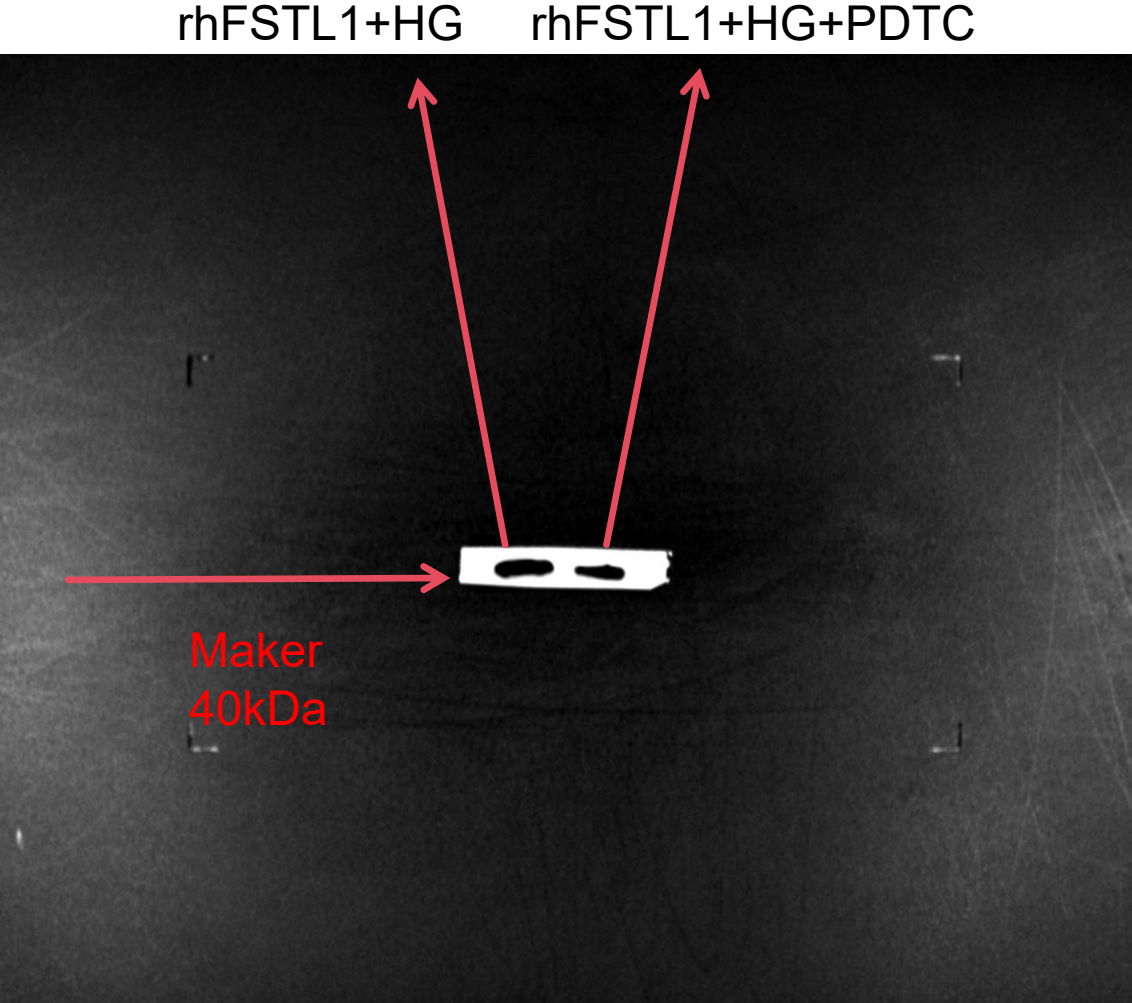

$\alpha$ -SMA-45kDa

2023-11-26

rhFSTL1+HG    rhFSTL1+HG+PDTC

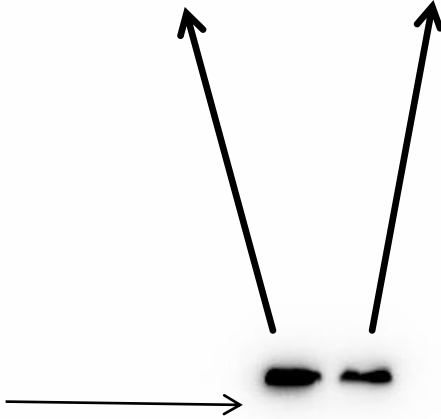

Maker  
40kDa

rhFSTL1+HG    rhFSTL1+HG+PDTC

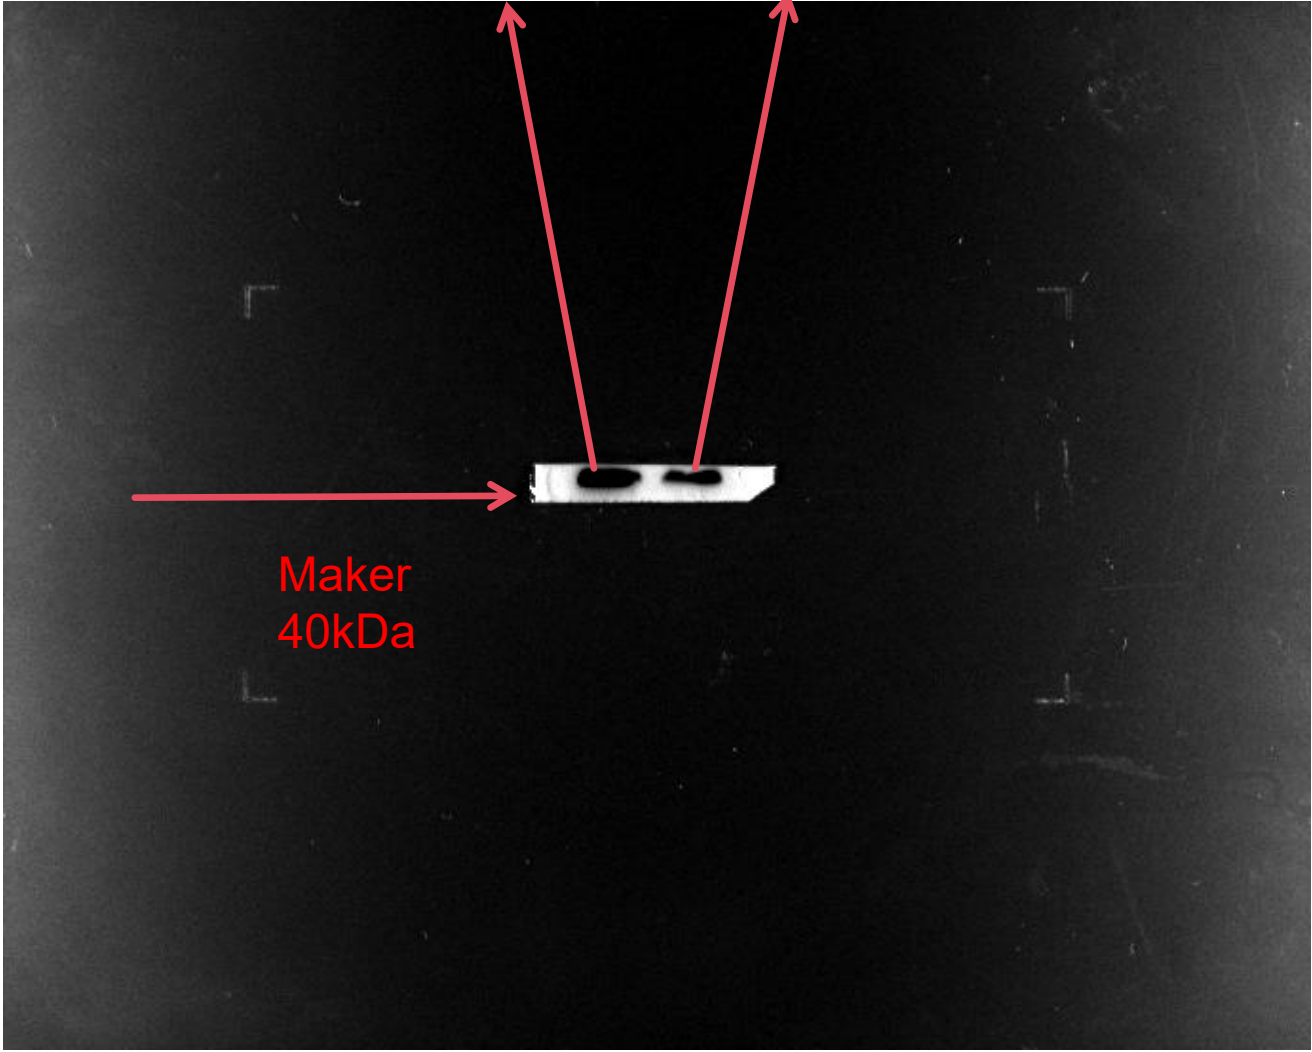

Maker  
40kDa
